# Supplementary material for: Identification of chlorinated products from tyrosine and tyrosyl dipeptides during chlorination: a computational study
Source: Royal Society of Chemistry journal article supplement (doi:10.1039/d2em00321j), 2022-01-01
Supplement: d2em00321j1.pdf [file d2em00321j1.pdf]

## Supporting Information

# Identification of chlorinated products from tyrosine and tyrosyl dipeptides during chlorination: a computational study

*Zizhang Ren, Yue Qiu, Mengxue Huan, Yong Dong Liu,\* Rugang Zhong*

Beijing Key Laboratory of Environmental and Viral Oncology,  
Faculty of Environment and Life, Beijing University of Technology,  
Beijing 100124, China

\*Corresponding author. Fax: +86-10-6739-2001.

E-mail: [ydliu@bjut.edu.cn](mailto:ydliu@bjut.edu.cn).

109 Pages

16 Tables

9 Figures

1 Scheme

44 Cartesian orientations of transition states

---

\*Corresponding author. Fax: +86-10-6739-2001. E-mail: [ydliu@bjut.edu.cn](mailto:ydliu@bjut.edu.cn).

## Contents

| <b>Item</b> | <b>Page</b> |
|-------------|-------------|
| Text S1     | 6           |
| Figure S1   | 7           |
| Table S1    | 7           |
| Table S2    | 8           |
| Figure S2   | 9           |
| Table S3    | 9           |
| Table S4    | 10          |
| Figure S3   | 11          |
| Table S5    | 11          |
| Table S6    | 12          |
| Table S7    | 13          |
| Table S8    | 13          |
| Table S9    | 13          |
| Figure S4   | 13          |
| Scheme S1   | 14          |
| Table S10   | 14          |
| Table S11   | 14          |
| Table S12   | 15          |
| Figure S5   | 15          |

|                                                           |       |
|-----------------------------------------------------------|-------|
| Figure S6                                                 | 15    |
| Table S13                                                 | 16    |
| Figure S7                                                 | 17    |
| Table S14                                                 | 18    |
| Figure S8                                                 | 19    |
| Figure S9                                                 | 20    |
| Table S15                                                 | 20 21 |
| Table S16                                                 | 21    |
| Standard orientation of TS-Tyr-p-C3                       | 22 23 |
| Standard orientation of TS- <i>N</i> -Cl-Tyr-p-C3         | 24 25 |
| Standard orientation of TS-5-Cl-Tyr-p-C3                  | 26 27 |
| Standard orientation of TS- <i>N,N</i> -di-Cl-Tyr-p-C3    | 28 29 |
| Standard orientation of TS-5, <i>N</i> -di-Cl-Tyr-p-C3    | 30 31 |
| Standard orientation of TS-5, <i>N,N</i> -tri-Cl-Tyr-p-C3 | 32 33 |
| Standard orientation of TS-Tyr-p-C5                       | 34 35 |
| Standard orientation of TS- <i>N</i> -Cl-Tyr-p-C5         | 36 37 |
| Standard orientation of TS-3-Cl-Tyr-p-C5                  | 38 39 |
| Standard orientation of TS- <i>N,N</i> -di-Cl-Tyr-p-C5    | 40 41 |
| Standard orientation of TS-3, <i>N</i> -di-Cl-Tyr-p-C5    | 42 43 |
| Standard orientation of TS-3, <i>N,N</i> -tri-Cl-Tyr-p-C5 | 44 45 |
| Standard orientation of TS-Tyr-N                          | 46 47 |

|                                                     |       |
|-----------------------------------------------------|-------|
| Standard orientation of TS-5-Cl-Tyr-N               | 48 49 |
| Standard orientation of TS-3-Cl-Tyr-N               | 50 51 |
| Standard orientation of TS-3,5-di-Cl-Tyr-N          | 52 53 |
| Standard orientation of TS-N-Cl-Tyr-N               | 54 55 |
| Standard orientation of TS-3,N-di-Cl-Tyr-N          | 56 57 |
| Standard orientation of TS-5,N-di-Cl-Tyr-N          | 58 59 |
| Standard orientation of TS-3,5,N-tri-Cl-Tyr-N       | 60 61 |
| Standard orientation of TS-Tyr-Am-p-C3              | 62 63 |
| Standard orientation of TS-N-Cl-Tyr-Am-p-C3         | 64 65 |
| Standard orientation of TS-5-Cl-Tyr-Am-p-C3         | 66 67 |
| Standard orientation of TS-N,N-di-Cl-Tyr-Am-p-C3    | 68 69 |
| Standard orientation of TS-5,N-di-Cl-Tyr-Am-p-C3    | 70 71 |
| Standard orientation of TS-5,N,N-tri-Cl-Tyr-Am-p-C3 | 72 73 |
| Standard orientation of TS-Tyr-Am-p-C5              | 74 75 |
| Standard orientation of TS-N-Cl-Tyr-Am-p-C5         | 76 77 |
| Standard orientation of TS-3-Cl-Tyr-Am-p-C5         | 78 79 |
| Standard orientation of TS-N,N-di-Cl-Tyr-Am-p-C5    | 80 81 |
| Standard orientation of TS-3,N-di-Cl-Tyr-Am-p-C5    | 82 83 |
| Standard orientation of TS-3,N,N-tri-Cl-Tyr-Am-p-C5 | 84 85 |
| Standard orientation of TS-Tyr-Am-N                 | 86 87 |
| Standard orientation of TS-5-Cl-Tyr-Am-N            | 88 89 |

|                                                           |         |
|-----------------------------------------------------------|---------|
| Standard orientation of TS-3-Cl-Tyr-Am-N                  | 90 91   |
| Standard orientation of TS-3,5-di-Cl-Tyr-Am-N             | 92 93   |
| Standard orientation of TS- <i>N</i> -Cl-Tyr-Am-N         | 94 95   |
| Standard orientation of TS-3, <i>N</i> -di-Cl-Tyr-Am-N    | 96 97   |
| Standard orientation of TS-5, <i>N</i> -di-Cl-Tyr-Am-N    | 98 99   |
| Standard orientation of TS-3,5, <i>N</i> -tri-Cl-Tyr-Am-N | 100 101 |
| Standard orientation of TS-NacTyr-p-C3                    | 102 103 |
| Standard orientation of TS-NacTyr-p-C5                    | 104 105 |
| Standard orientation of TS-3-Cl-NacTyr-p-C5               | 106 107 |
| Standard orientation of TS-5-Cl-NacTyr-p-C3               | 108 109 |

## **Text S1**

### **Quantum Chemical Linear Free Energy Relationship (LFER) for Estimation of $pK_a$ Values**

Based on the proton theory of acids and bases, acid is a donor of protons. The stronger the ability to provide protons, the stronger the acidity. Quantum chemical calculations were performed with the Gaussian 09 software package. The bond dissociation energies (BDEs) of X-H(X=N/O/C) in organic compounds were calculated at the M06-2X/cc-pVTZ level in conjunction with the SMD implicit solvation model. All structures were confirmed as minima by frequency calculations.

BDEs values were computed by evaluating the enthalpies difference.

$$\text{BDE} = H(\text{H}_3\text{O}^+) + H(\text{R-X}^-) - H(\text{H}_2\text{O}) - H(\text{R-X-H})$$

The correlation between the BDEs and experimental  $pK_a$  values of amines was established and illustrated in Figure S1 and Table S1. The squared correlation coefficient for the above system is  $R^2 = 0.982$ . Based on the obtained quantum chemical LFER, the calculated  $pK_a$  and BDEs chlorinated tyrosine, Tyr-amide and *N*-Acetyl-*L*-Tyrosine were listed in Table S2.

**Figure S1**

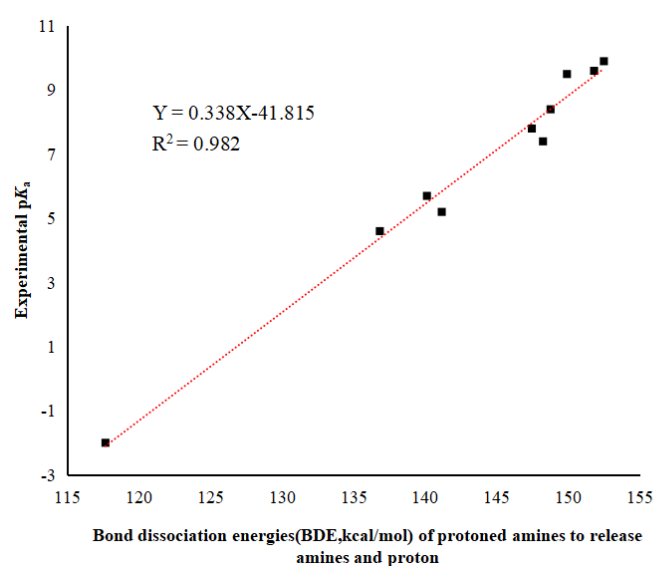

**Figure S1.** The correlation between the experimental  $pK_a$  values and BDEs for 10 amines.

**Table S1**

**Table S1.** The  $pK_a$  values and BDEs of 10 amines.

| Amines                                                           | $pK_a$ (exp.) | BDE (kcal/mol) | $pK_a$ (calc.) |
|------------------------------------------------------------------|---------------|----------------|----------------|
| CN-N(CH <sub>2</sub> CH <sub>3</sub> ) <sub>2</sub>              | -2.0          | 117.6          | -2.1           |
| C <sub>6</sub> H <sub>5</sub> -NH <sub>2</sub>                   | 4.6           | 136.8          | 4.4            |
| C <sub>6</sub> H <sub>5</sub> -N-(CH <sub>3</sub> ) <sub>2</sub> | 5.2           | 141.2          | 5.9            |
| CF <sub>3</sub> -CH <sub>2</sub> -NH <sub>2</sub>                | 5.7           | 140.1          | 5.5            |
| 4-Methylmorpholine                                               | 7.4           | 148.3          | 8.3            |
| (C <sub>2</sub> H <sub>5</sub> OH) <sub>3</sub> N                | 7.8           | 147.5          | 8.0            |
| Morpholine                                                       | 8.4           | 148.8          | 8.5            |
| CH <sub>2</sub> OH-CH <sub>2</sub> -NH <sub>2</sub>              | 9.5           | 149.9          | 8.9            |
| Glycine                                                          | 9.6           | 151.8          | 9.5            |
| Alanine                                                          | 9.9           | 152.5          | 9.7            |

## Table S2

**Table S2.** The  $pK_a$  values of N-H bonds in tyrosine, tyrosine-amide, their chlorinated products and *N*-Acetyl-*L*-Tyrosine calculated by using LFER.

| Heterolytic reaction                                                                     | Phenol            |                   |
|------------------------------------------------------------------------------------------|-------------------|-------------------|
|                                                                                          | BDE<br>(kcal/mol) | $pK_a$<br>(calc.) |
| $\text{Tyr}^+ \rightarrow \text{Tyr} + \text{H}^+$                                       | 151.4             | 9.3               |
| $\text{Tyr} \rightarrow \text{Tyr}^- + \text{H}^+$                                       | 202.2             | 26.5              |
| $3\text{-Cl-Tyr}^+ \rightarrow 3\text{-Cl-Tyr} + \text{H}^+$                             | 150.9             | 9.2               |
| $5\text{-Cl-Tyr}^+ \rightarrow 5\text{-Cl-Tyr} + \text{H}^+$                             | 150.7             | 9.1               |
| $N\text{-Cl-Tyr}^+ \rightarrow N\text{-Cl-Tyr} + \text{H}^+$                             | 136.8             | 4.4               |
| $N\text{-Cl-Tyr} \rightarrow N\text{-Cl-Tyr}^- + \text{H}^+$                             | 184.1             | 20.4              |
| $3,5\text{-di-Cl-Tyr}^+ \rightarrow 3,5\text{-di-Cl-Tyr} + \text{H}^+$                   | 150.4             | 9.0               |
| $3,N\text{-di-Cl-Tyr}^+ \rightarrow 3,N\text{-di-Cl-Tyr} + \text{H}^+$                   | 136.0             | 4.2               |
| $3,N\text{-di-Cl-Tyr} \rightarrow 3,N\text{-di-Cl-Tyr}^- + \text{H}^+$                   | 183.7             | 20.2              |
| $5,N\text{-di-Cl-Tyr}^+ \rightarrow 5,N\text{-di-Cl-Tyr} + \text{H}^+$                   | 136.0             | 4.2               |
| $5,N\text{-di-Cl-Tyr} \rightarrow 5,N\text{-di-Cl-Tyr}^- + \text{H}^+$                   | 183.6             | 20.2              |
| $3,5,N\text{-tri-Cl-Tyr} \rightarrow 3,5,N\text{-tri-Cl-Tyr}^- + \text{H}^+$             | 183.0             | 20.0              |
| $\text{Tyr-Amide}^+ \rightarrow \text{Tyr} + \text{H}^+$                                 | 145.6             | 7.4               |
| $3\text{-Cl-Tyr-Amide}^+ \rightarrow 3\text{-Cl-Tyr-Amide} + \text{H}^+$                 | 145.1             | 7.2               |
| $5\text{-Cl-Tyr-Amide}^+ \rightarrow 5\text{-Cl-Tyr-Amide} + \text{H}^+$                 | 144.9             | 7.2               |
| $N\text{-Cl-Tyr-Amide}^+ \rightarrow N\text{-Cl-Tyr-Amide} + \text{H}^+$                 | 127.2             | 1.2               |
| $3,5\text{-di-Cl-Tyr-Amide}^+ \rightarrow 3,5\text{-di-Cl-Tyr-Amide} + \text{H}^+$       | 143.8             | 6.8               |
| $3,N\text{-di-Cl-Tyr-Amide}^+ \rightarrow 3,N\text{-di-Cl-Tyr-Amide} + \text{H}^+$       | 126.8             | 1.1               |
| $5,N\text{-di-Cl-Tyr-Amide}^+ \rightarrow 5,N\text{-di-Cl-Tyr-Amide} + \text{H}^+$       | 126.7             | 1.1               |
| $3,5,N\text{-tri-Cl-Tyr-Amide}^+ \rightarrow 3,5,N\text{-tri-Cl-Tyr-Amide} + \text{H}^+$ | 126.1             | 0.8               |
| $N\text{-Acetyl-}L\text{-Tyr}^+ \rightarrow N\text{-Acetyl-}L\text{-Tyr} + \text{H}^+$   | 125.4             | 0.6               |
| $N\text{-Acetyl-}L\text{-Tyr} \rightarrow N\text{-Acetyl-}L\text{-Tyr}^- + \text{H}^+$   | 174.1             | 17.0              |



The correlation between the BDEs and experimental  $pK_a$  values of O-H bonds of substituted phenols was established and illustrated in Figure S2 and Table S3. The squared correlation coefficient for the above system is  $R^2 = 0.992$ . The calculated  $pK_a$  and BDEs of tyrosine, Tyr-amide, *N*-Acetyl-*L*-Tyrosine and their chlorinated products were listed in Table S4.

**Figure S2**

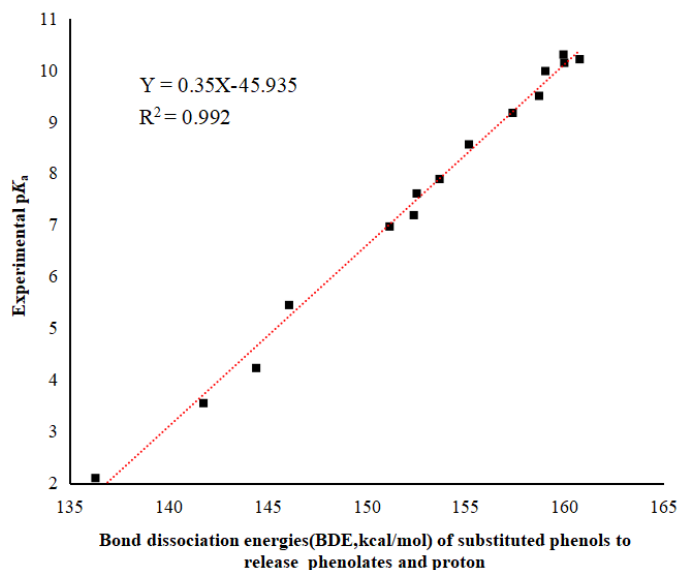

**Figure S2.** The correlation between the experimental  $pK_a$  values and BDE for 15 substituted phenols.

**Table S3**

**Table S3.** The  $pK_a$  values and BDEs of O-H bonds in 15 substituted phenols.

| Substituted phenols         | $pK_a$ (exp.) | BDE (kcal/mol) | $pK_a$ (calc.) |
|-----------------------------|---------------|----------------|----------------|
| 2-Cl-4,6-di-nitrophenol     | 2.1           | 136.3          | 1.9            |
| 2,6-di-Cl-4-nitrophenol     | 3.6           | 141.7          | 3.8            |
| 4-methyl-2,6-di-nitrophenol | 4.2           | 144.4          | 4.7            |
| 2-Cl-4-nitrophenol          | 5.5           | 146.1          | 5.3            |
| 2,6-di-Cl-phenol            | 7.0           | 151.2          | 7.1            |
| 2,6-di-Cl-4-methylphenol    | 7.2           | 152.4          | 7.6            |
| 4-Formylphenol              | 7.6           | 152.5          | 7.6            |
| 2,4-di-Cl-phenol            | 7.9           | 153.7          | 8.0            |
| 2-Chlorophenol              | 8.6           | 155.2          | 8.5            |
| 4-Bromophenol               | 9.2           | 157.4          | 9.3            |
| 4-Acetaminophenol           | 9.5           | 158.7          | 9.8            |
| Phenol                      | 10.0          | 159.0          | 9.9            |
| 4-tBuphenol                 | 10.1          | 160.0          | 10.3           |
| 4-Methoxyphenol             | 10.2          | 160.8          | 10.5           |
| 4-Ipropphenol               | 10.3          | 160.0          | 10.2           |

## Table S4

**Table S4.** The  $pK_a$  values of O-H bond in tyrosine, tyrosine-amide, *N*-Acetyl-*L*-Tyrosine and their chlorinated products calculated by using LFER.

| Organic Compounds                                      | BDE(kcal/mol) | $pK_a$ (calc.) |
|--------------------------------------------------------|---------------|----------------|
| Tyr                                                    | 160.7         | 10.2           |
| 2-Cl-Tyr                                               | 157.2         | 9.1            |
| 3-Cl-Tyr                                               | 156.7         | 8.9            |
| 5-Cl-Tyr                                               | 156.6         | 8.9            |
| 6-Cl-Tyr                                               | 157.1         | 9.0            |
| <i>N</i> -Cl-Tyr                                       | 160.4         | 10.2           |
| 3, <i>N</i> -di-Cl-Tyr                                 | 156.7         | 8.9            |
| 5, <i>N</i> -di-Cl-Tyr                                 | 156.6         | 8.9            |
| 3,5-di-Cl-Tyr                                          | 152.7         | 7.5            |
| <i>N</i> , <i>N</i> -di-Cl-Tyr                         | 160.0         | 10.1           |
| 3, <i>N</i> , <i>N</i> -tri-Cl-Tyr                     | 156.3         | 8.8            |
| 5, <i>N</i> , <i>N</i> -tri-Cl-Tyr                     | 156.2         | 8.7            |
| 3,5, <i>N</i> -tri-Cl-Tyr                              | 152.6         | 7.5            |
| Tyr-Amide                                              | 159.6         | 10.0           |
| 3-Cl-Tyr-Amide                                         | 155.8         | 8.6            |
| 5-Cl-Tyr-Amide                                         | 155.8         | 8.6            |
| <i>N</i> -Cl-Tyr-Amide                                 | 159.3         | 9.8            |
| 3, <i>N</i> -di-Cl-Tyr-Amide                           | 155.4         | 8.5            |
| 5, <i>N</i> -di-Cl-Tyr-Amide                           | 155.4         | 8.4            |
| 3,5-di-Cl-Tyr-Amide                                    | 152.4         | 7.4            |
| <i>N</i> , <i>N</i> -di-Cl-Tyr-Amide                   | 159.0         | 9.7            |
| 3, <i>N</i> , <i>N</i> -tri-Cl-Tyr-Amide               | 155.2         | 8.4            |
| 5, <i>N</i> , <i>N</i> -tri-Cl-Tyr-Amide               | 155.1         | 8.4            |
| 3,5, <i>N</i> -tri-Cl-Tyr-Amide                        | 151.6         | 7.1            |
| 3,5, <i>N,N</i> -tetra-Cl-Tyr-Amide                    | 151.1         | 7.0            |
| <i>N</i> -Acetyl- <i>L</i> -Tyr                        | 160.2         | 10.1           |
| 2-Cl- <i>N</i> -Acetyl- <i>L</i> -Tyr                  | 157.5         | 9.2            |
| 3-Cl- <i>N</i> -Acetyl- <i>L</i> -Tyr                  | 156.4         | 8.8            |
| 5-Cl- <i>N</i> -Acetyl- <i>L</i> -Tyr                  | 156.4         | 8.8            |
| 6-Cl- <i>N</i> -Acetyl- <i>L</i> -Tyr                  | 157.5         | 9.2            |
| <i>N</i> -Cl- <i>N</i> -Acetyl- <i>L</i> -Tyr          | 160.0         | 10.1           |
| 3, <i>N</i> -di-Cl- <i>N</i> -Acetyl- <i>L</i> -Tyr    | 156.2         | 8.7            |
| 5, <i>N</i> -di-Cl- <i>N</i> -Acetyl- <i>L</i> -Tyr    | 156.0         | 8.7            |
| 3,5-di-Cl- <i>N</i> -Acetyl- <i>L</i> -Tyr             | 152.5         | 7.4            |
| 3,5, <i>N</i> -tri-Cl- <i>N</i> -Acetyl- <i>L</i> -Tyr | 152.1         | 7.3            |

The correlation between the BDEs and experimental  $pK_a$  values of C-H bonds of organic compounds was established and illustrated in Figure S3 and Table S5. The squared correlation coefficient for the above system is  $R^2 = 0.972$ . The calculated  $pK_a$  and BDEs of tyrosine, *N*-Acetyl-*L*-Tyrosine and their chlorinated products were listed in Table S6.

**Figure S3**

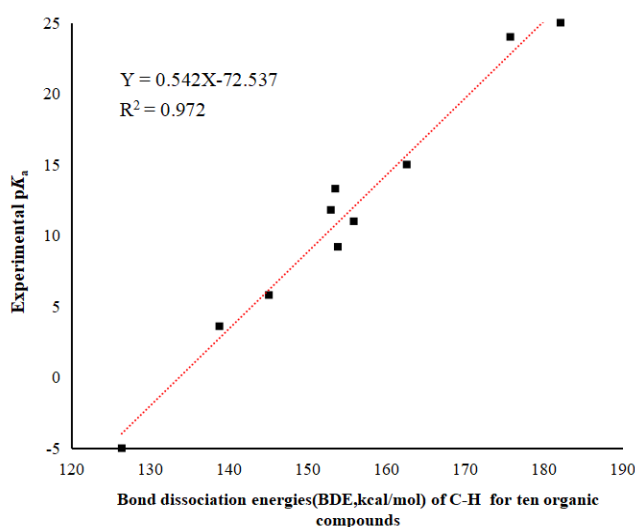

**Figure S3.** The correlation between the experimental  $pK_a$  values and BDEs of C-H for 10 organic compounds.

**Table S5**

**Table S5** The  $pK_a$  values and BDEs of C-H bonds in 10 organic compounds.

| Organic Compounds                                                   | $pK_a$ (exp.) | BDE (kcal/mol) | $pK_a$ (calc.) |
|---------------------------------------------------------------------|---------------|----------------|----------------|
| CH-(CN) <sub>3</sub>                                                | -5.0          | 126.4          | -4.0           |
| CH <sub>2</sub> -(NO <sub>2</sub> ) <sub>2</sub>                    | 3.6           | 138.8          | 2.7            |
| C <sub>2</sub> H <sub>5</sub> -O <sub>2</sub> C-CH <sub>2</sub> -NO | 5.8           | 145.1          | 6.1            |
| HCN                                                                 | 9.2           | 153.8          | 10.8           |
| CH <sub>3</sub> COCH <sub>2</sub> COOC <sub>2</sub> H <sub>5</sub>  | 11.0          | 155.9          | 11.9           |
| CH <sub>2</sub> -(CN) <sub>2</sub>                                  | 11.8          | 153.0          | 10.4           |
| CH <sub>2</sub> -(COO-C <sub>2</sub> H <sub>5</sub> ) <sub>2</sub>  | 13.3          | 153.5          | 10.7           |
| CH <sub>3</sub> -CO-CHCl <sub>2</sub>                               | 15.0          | 162.6          | 15.6           |
| CH <sub>3</sub> -COOH                                               | 24.0          | 175.7          | 22.7           |
| CH <sub>3</sub> -CN                                                 | 25.0          | 182.1          | 26.2           |

## Table S6

**Table S6.** The  $pK_a$  values of C-H bond in tyrosine, *N*-Acetyl-*L*-Tyrosine and their chlorinated products calculated by using LFER.

| Heterolytic reaction                                                                                                                                                      | Phenol            |                   | Phenolate         |                   |
|---------------------------------------------------------------------------------------------------------------------------------------------------------------------------|-------------------|-------------------|-------------------|-------------------|
|                                                                                                                                                                           | BDE<br>(kcal/mol) | $pK_a$<br>(calc.) | BDE<br>(kcal/mol) | $pK_a$<br>(calc.) |
| Tyr $\rightarrow$ C <sub>2</sub> -Tyr <sup>•</sup> + H <sup>+</sup>                                                                                                       | 206.0             | 39.1              | 212.6             | 42.7              |
| Tyr $\rightarrow$ C <sub>3</sub> -Tyr <sup>•</sup> + H <sup>+</sup>                                                                                                       | 200.3             | 36.0              | 215.3             | 44.1              |
| Tyr $\rightarrow$ C <sub>5</sub> -Tyr <sup>•</sup> + H <sup>+</sup>                                                                                                       | 202.8             | 37.4              | 214.8             | 43.9              |
| Tyr $\rightarrow$ C <sub>6</sub> -Tyr <sup>•</sup> + H <sup>+</sup>                                                                                                       | 206.4             | 39.3              | 213.3             | 43.1              |
| 2-Cl-Tyr <sup>+</sup> $\rightarrow$ 2-Cl-Tyr + H <sup>+</sup>                                                                                                             | 89.95             | -23.8             | 99.0              | -18.9             |
| 3-Cl-Tyr <sup>+</sup> $\rightarrow$ 3-Cl-Tyr + H <sup>+</sup>                                                                                                             | 100.9             | -17.9             | 133.2             | 0.4               |
| 5-Cl-Tyr <sup>+</sup> $\rightarrow$ 5-Cl-Tyr + H <sup>+</sup>                                                                                                             | 99.5              | -18.6             | 133.6             | 0.1               |
| 6-Cl-Tyr <sup>+</sup> $\rightarrow$ 6-Cl-Tyr + H <sup>+</sup>                                                                                                             | 90.1              | -23.7             | 98.3              | -19.2             |
| C <sub>3</sub> -3, <i>N</i> -di-Cl-Tyr <sup>+</sup> $\rightarrow$ 3, <i>N</i> -di-Cl-Tyr <sup>•</sup> + H <sup>+</sup>                                                    | 100.2             | -18.2             | 133.1             | -0.4              |
| C <sub>5</sub> -5, <i>N</i> -di-Cl-Tyr <sup>+</sup> $\rightarrow$ 3, <i>N</i> -di-Cl-Tyr <sup>•</sup> + H <sup>+</sup>                                                    | 99.2              | -18.8             | 133.8             | 0.0               |
| C <sub>3</sub> -3,5-di-Cl-Tyr <sup>+</sup> $\rightarrow$ 3,5-di-Cl-Tyr <sup>•</sup> + H <sup>+</sup>                                                                      | 95.3              | -20.9             | 129.4             | -2.4              |
| C <sub>5</sub> -3,5-di-Cl-Tyr <sup>+</sup> $\rightarrow$ 3,5-di-Cl-Tyr <sup>•</sup> + H <sup>+</sup>                                                                      | 94.7              | -21.2             | 129.9             | -2.1              |
| C <sub>3</sub> -3, <i>N,N</i> -tri-Cl-Tyr <sup>+</sup> $\rightarrow$ 3, <i>N,N</i> -tri-Cl-Tyr + H <sup>+</sup>                                                           | 98.8              | -19.0             | 131.8             | -1.1              |
| C <sub>5</sub> -5, <i>N,N</i> -tri-Cl-Tyr <sup>+</sup> $\rightarrow$ 5, <i>N,N</i> -tri-Cl-Tyr + H <sup>+</sup>                                                           | 98.9              | -18.9             | 133.4             | -0.2              |
| C <sub>3</sub> -3,5, <i>N</i> -tri-Cl-Tyr <sup>+</sup> $\rightarrow$ 3,5, <i>N</i> -tri-Cl-Tyr + H <sup>+</sup>                                                           | 94.4              | -21.4             | 129.2             | -2.5              |
| C <sub>5</sub> -3,5, <i>N</i> -tri-Cl-Tyr <sup>+</sup> $\rightarrow$ 3,5, <i>N</i> -tri-Cl-Tyr + H <sup>+</sup>                                                           | 93.7              | -21.8             | 129.9             | -2.2              |
| 3-Cl- <i>N</i> -Acetyl- <i>L</i> -Tyr <sup>+</sup> $\rightarrow$ Cl- <i>N</i> -Acetyl- <i>L</i> -Tyr + H <sup>+</sup>                                                     | 99.8              | -18.4             | 132.5             | -0.7              |
| 5-Cl- <i>N</i> -Acetyl- <i>L</i> -Tyr <sup>+</sup> $\rightarrow$ Cl- <i>N</i> -Acetyl- <i>L</i> -Tyr + H <sup>+</sup>                                                     | 99.6              | -18.6             | 133.4             | 0.2               |
| C <sub>3</sub> -3,5-di-Cl- <i>N</i> -Acetyl- <i>L</i> -Tyr <sup>+</sup> $\rightarrow$ 3,5-di-Cl- <i>N</i> -Acetyl- <i>L</i> -Tyr + H <sup>+</sup>                         | 94.0              | -21.6             | 128.6             | -2.8              |
| C <sub>5</sub> -3,5-di-Cl- <i>N</i> -Acetyl- <i>L</i> -Tyr <sup>+</sup> $\rightarrow$ 3,5-di-Cl- <i>N</i> -Acetyl- <i>L</i> -Tyr + H <sup>+</sup>                         | 95.5              | -20.8             | 129.9             | -2.1              |
| C <sub>3</sub> -3, <i>N</i> -di-Cl- <i>N</i> -Acetyl- <i>L</i> -Tyr <sup>+</sup> $\rightarrow$ 3, <i>N</i> -di-Cl- <i>N</i> -Acetyl- <i>L</i> -Tyr + H <sup>+</sup>       | 98.8              | -19.0             | 131.8             | -1.1              |
| C <sub>5</sub> -5, <i>N</i> -di-Cl- <i>N</i> -Acetyl- <i>L</i> -Tyr <sup>+</sup> $\rightarrow$ 5, <i>N</i> -di-Cl- <i>N</i> -Acetyl- <i>L</i> -Tyr + H <sup>+</sup>       | 98.8              | -19.0             | 132.9             | -0.5              |
| C <sub>3</sub> -3,5, <i>N</i> -tri-Cl- <i>N</i> -Acetyl- <i>L</i> -Tyr <sup>+</sup> $\rightarrow$ 3,5, <i>N</i> -tri-Cl- <i>N</i> -Acetyl- <i>L</i> -Tyr + H <sup>+</sup> | 93.6              | -21.8             | 127.9             | -3.2              |
| C <sub>5</sub> -3,5, <i>N</i> -tri-Cl- <i>N</i> -Acetyl- <i>L</i> -Tyr <sup>+</sup> $\rightarrow$ 3,5, <i>N</i> -tri-Cl- <i>N</i> -Acetyl- <i>L</i> -Tyr + H <sup>+</sup> | 94.7              | -21.2             | 129.1             | -2.5              |

## Table S7

**Table S7.** The activation free energies  $\Delta G^\ddagger$  (at 298 K and 1 atm, in kcal/mol) for the *N*-chlorination of the  $\alpha$ -amino group of valine assisted by 2 water molecules calculated at the DFT/aug-cc-pVTZ//DFT/6-31+G(d) level with the SMD solvent model.

| B3LYP(D3BJ) | M05-2X(D3) | M06-2X(D3) |
|-------------|------------|------------|
| 6.3         | 2.7        | 2.3        |

## Table S8

**Table S8.** The activation free energies  $\Delta G^\ddagger$  (at 298 K and 1 atm, in kcal/mol) for the *N*-chlorination of the  $\alpha$ -amino group of valine assisted by 2–6 water molecules calculated at the B3LYP(D3BJ)/aug-cc-pVTZ//B3LYP(D3BJ)/6-31+G(d) level with the SMD solvent model.

|     | 2w  | 3w  | 4w  | 5w  | 6w  |
|-----|-----|-----|-----|-----|-----|
| Val | 6.3 | 2.9 | 7.7 | 7.2 | 5.2 |

## Table S9

**Table S9.** The activation free energies  $\Delta G^\ddagger$  (at 298 K and 1 atm, in kcal/mol) for the *N*-chlorination of the  $\alpha$ -amino group in the eight amino acid model compounds assisted by 5 water molecules calculated at the B3LYP(D3BJ)/aug-cc-pVTZ//B3LYP(D3BJ)/6-31+G(d) level with the SMD solvent model.

|       | Gly | Ala | Val | <i>N</i> -Cl-Val | Asp | ILu | Phe | Tyr |
|-------|-----|-----|-----|------------------|-----|-----|-----|-----|
| Exp.  | 7.1 | 7.3 | 7.2 | 13.8             | 7.3 | 7.4 | 6.1 | 7.6 |
| Calc. | 6.7 | 6.6 | 7.2 | 11.4             | 7.3 | 6.8 | 6.5 | 5.8 |

## Figure S4

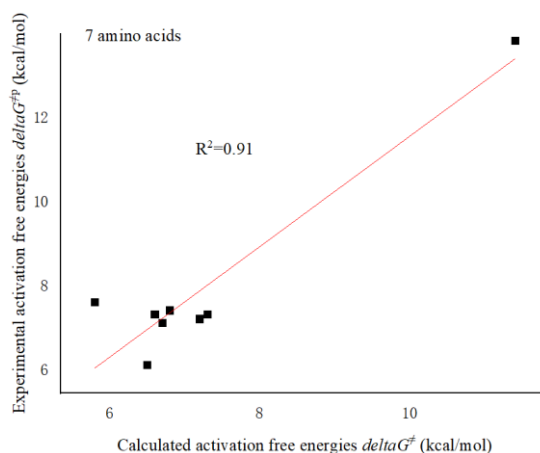

**Figure S4.** The estimated experimental  $\Delta G^\ddagger_{\text{exp-est}}$  for the above seven amino acids were established with the  $R^2$  value of 0.91

## Scheme S1

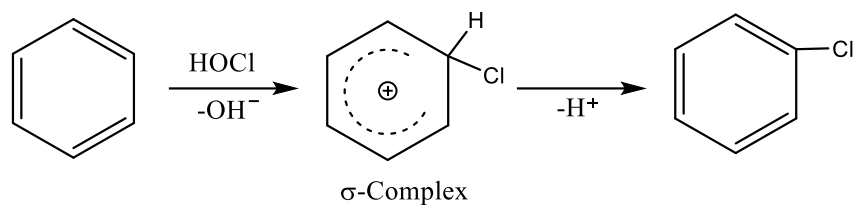

Scheme S1 Reaction mechanism for the electrophilic substitution on the aromatic group ( $S_{EAr}$ )

## Table S10

**Table S10.** The activation free energies  $\Delta G^\ddagger$  (at 298 K and 1 atm, in kcal/mol) for the C-chlorination at the C2 site of phenolate and phenol assisted by 3 water molecules calculated at the DFT/aug-cc-pVTZ//DFT/6-31+G(d) level with the SMD solvent.

|           | M06-2X(D3) | M05(D3) | M05-2X(D3) | Exp. |
|-----------|------------|---------|------------|------|
| Phenolate | 8.8        | 5.8     | 7.4        | 11.5 |
| Phenol    | 26.2       | 20.6    | 23.1       | 18.1 |

## Table S11

**Table S11.** The activation free energies  $\Delta G^\ddagger$  (at 298 K and 1 atm, in kcal/mol) calculated at the DFT/aug-cc-pVTZ//DFT/6-31+G(d) level with the SMD solvent for the C-chlorination at the C2 site of phenolate and phenol assisted by 2-6 water molecules.

| No. of water molecules | Phenolate  | Phenol  |
|------------------------|------------|---------|
|                        | M06-2X(D3) | M05(D3) |
| 2w                     | 9.4        | 17.2    |
| 3w                     | 8.8        | 20.6    |
| 4w                     | 9.5        | 20.7    |
| 5w                     | 8.4        | 17.7    |
| 6w                     | 10.1       | 19.5    |

## Table S12

**Table S12.** The activation free energies  $\Delta G^\ddagger$  (at 298 K and 1 atm, in kcal/mol) calculated at the DFT/aug-cc-pVTZ//DFT/6-31+G(d) level with the SMD solvent for the C-chlorination at the C2 site of the phenolate and phenol moieties in the six phenolic model compounds assisted by respective 6 and 5 water molecules.

| Compounds              | Phenolate |            | Phenol |         |
|------------------------|-----------|------------|--------|---------|
|                        | Exp.      | M06-2X(D3) | Exp.   | M05(D3) |
| unsubstituted          | 11.5      | 10.1       | 18.1   | 17.7    |
| 4-methyl               | 11.4      | 9.6        | 18.9   | 18.7    |
| 4-chloro               | 12.9      | 11.5       | 19.8   | 22.0    |
| 4-cyano                | 14.9      | 12.0       | 19.6   | 20.9    |
| 3-hydroxy-4,6-dichloro | 11.3      | 10.8       | 15.5   | 18.2    |
| 3-hydroxy-5-methyl     | 8.3       | 5.7        | 13.2   | 11.1    |

## Figure S5

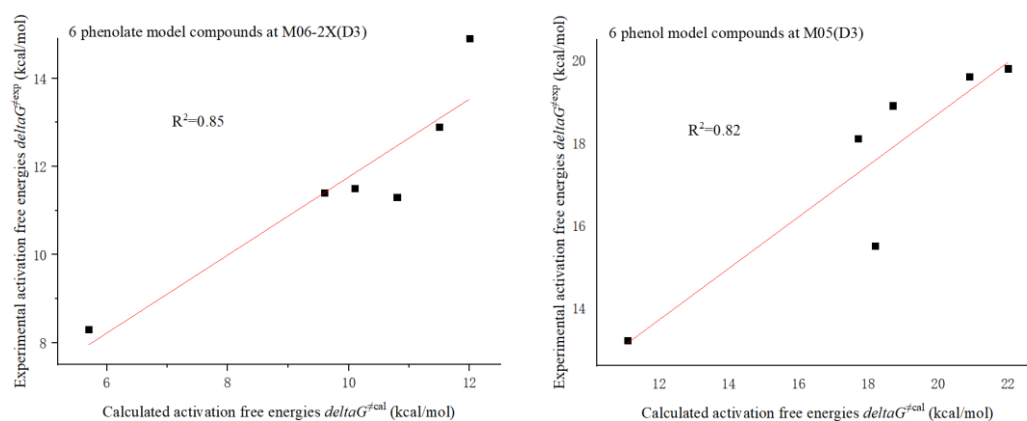

**Figure S5** Linear relationship between the calculated  $\Delta G^{\ddagger\text{cal}}$  values and the experimental  $\Delta G^{\ddagger\text{exp}}$  values for 6 phenolic compounds

## Figure S6

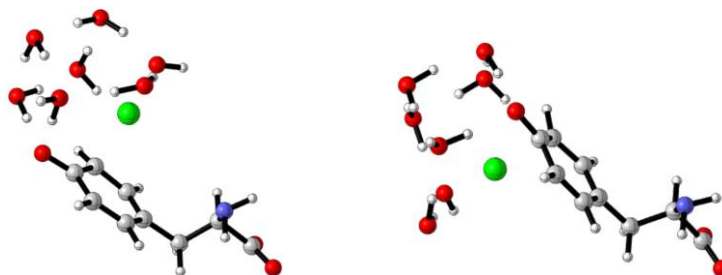

**Figure S6** Two ways for HOCl attacking the phenol ring moiety in Tyr or its dipeptides

## Table S13

**Table S13.** The  $k_{\text{obs-est}}$  ( $\text{M}^{-1} \text{s}^{-1}$ ) and reaction energies  $\Delta H$  (at 298 K and 1 atm, in kcal/mol) for the chlorination reactions of Tyr.

| Reactions                                                                  | $k_{\text{obs-est}}$ | $\Delta H$ |
|----------------------------------------------------------------------------|----------------------|------------|
| (1) Tyr $\rightarrow$ <i>N</i> -Cl-Tyr                                     | $1.7 \times 10^8$    | -17.0      |
| (2) Tyr $\rightarrow$ 2-Cl-Tyr                                             | $2.3 \times 10^{-3}$ | -45.7      |
| (3) Tyr $\rightarrow$ 3-Cl-Tyr                                             | 118.6                | -50.4      |
| (4) Tyr $\rightarrow$ 5-Cl-Tyr                                             | 116.9                | -46.6      |
| (5) Tyr $\rightarrow$ 6-Cl-Tyr                                             | $7.4 \times 10^{-3}$ | -40.0      |
| (6) <i>N</i> -Cl-Tyr $\rightarrow$ <i>N,N</i> -di-Cl-Tyr                   | $5.9 \times 10^3$    | -17.8      |
| (7) <i>N</i> -Cl-Tyr $\rightarrow$ 3, <i>N</i> -di-Cl-Tyr                  | 44.4                 | -52.3      |
| (8) <i>N</i> -Cl-Tyr $\rightarrow$ 5, <i>N</i> -di-Cl-Tyr                  | 72.4                 | -48.9      |
| (9) 3-Cl-Tyr $\rightarrow$ 3, <i>N</i> -di-Cl-Tyr                          | $8.2 \times 10^7$    | -17.1      |
| (10) 3-Cl-Tyr $\rightarrow$ 3,5-di-Cl-Tyr                                  | 185.2                | -44.8      |
| (11) 5-Cl-Tyr $\rightarrow$ 5, <i>N</i> -di-Cl-Tyr                         | $5.0 \times 10^7$    | -16.1      |
| (12) 5-Cl-Tyr $\rightarrow$ 3,5-di-Cl-Tyr                                  | 127.3                | -52.8      |
| (13) <i>N,N</i> -di-Cl-Tyr $\rightarrow$ 3, <i>N,N</i> -tri-Cl-Tyr         | 89.8                 | -52.3      |
| (14) <i>N,N</i> -di-Cl-Tyr $\rightarrow$ 5, <i>N,N</i> -tri-Cl-Tyr         | 92.9                 | -49.6      |
| (15) 3, <i>N</i> -di-Cl-Tyr $\rightarrow$ 3, <i>N,N</i> -tri-Cl-Tyr        | 192.2                | -17.8      |
| (16) 3, <i>N</i> -di-Cl-Tyr $\rightarrow$ 3,5, <i>N</i> -tri-Cl-Tyr        | 112.0                | -46.9      |
| (17) 5, <i>N</i> -di-Cl-Tyr $\rightarrow$ 5, <i>N,N</i> -tri-Cl-Tyr        | 125.4                | -20.2      |
| (18) 5, <i>N</i> -di-Cl-Tyr $\rightarrow$ 3,5, <i>N</i> -tri-Cl-Tyr        | 363.1                | -43.2      |
| (19) 3,5-di-Cl-Tyr $\rightarrow$ 3,5, <i>N</i> -tri-Cl-Tyr                 | $1.8 \times 10^6$    | -17.0      |
| (20) 3,5, <i>N</i> -tri-Cl-Tyr $\rightarrow$ 3,5, <i>N,N</i> -tetra-Cl-Tyr | 238.0                | -19.1      |
| (21) 5, <i>N,N</i> -tri-Cl-Tyr $\rightarrow$ 3,5, <i>N,N</i> -tetra-Cl-Tyr | 125.2                | -53.1      |
| (22) 3, <i>N,N</i> -tri-Cl-Tyr $\rightarrow$ 3,5, <i>N,N</i> -tetra-Cl-Tyr | $1.3 \times 10^3$    | -50.6      |



Figure S7

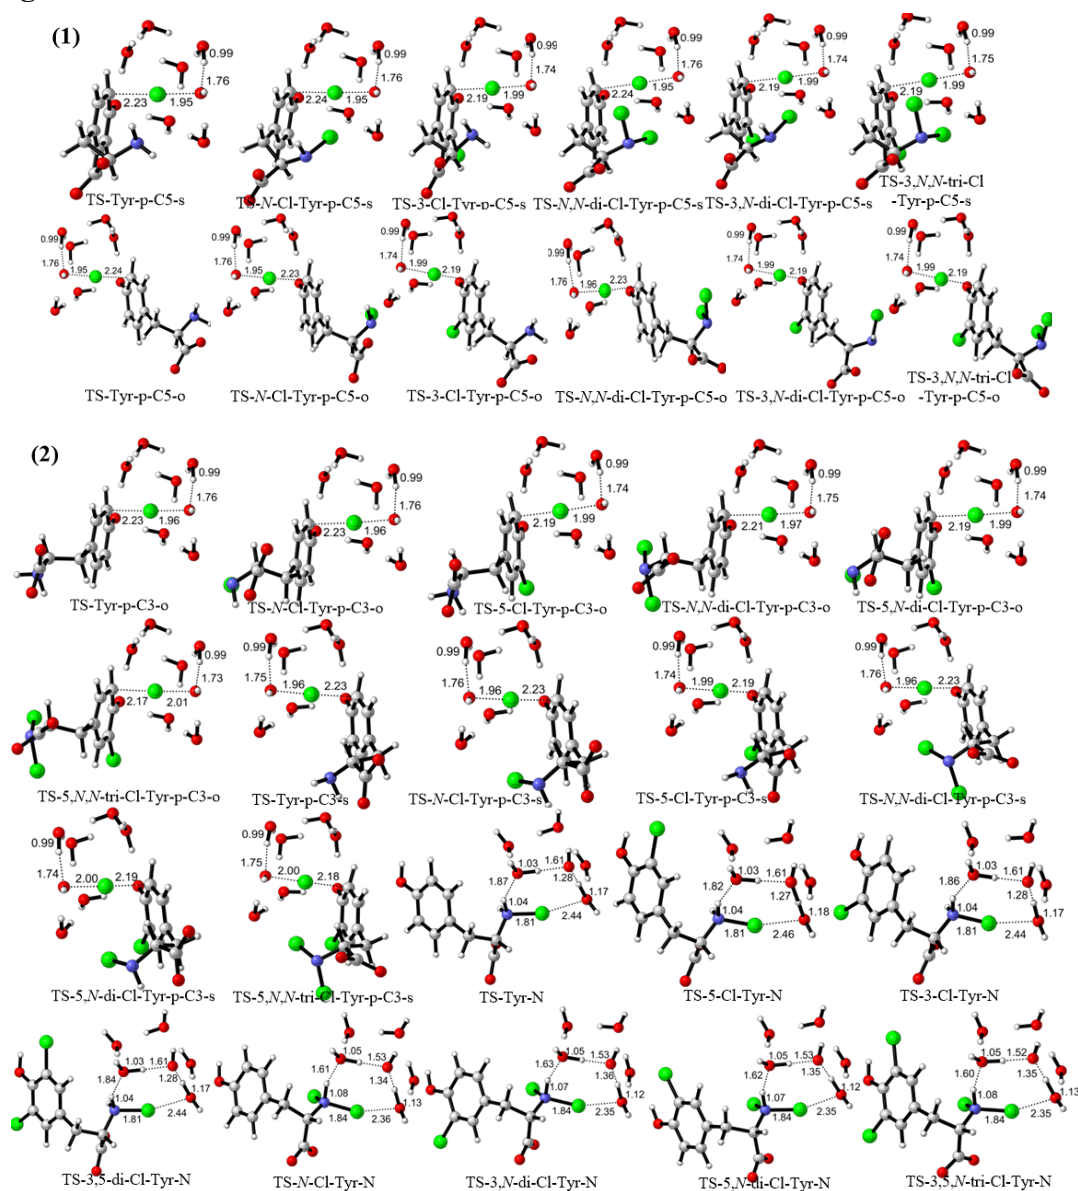

Figure S7. Structures of transition states and important geometries for the chlorination of Tyr compounds (Figure S7-(1) shows the reactions of C5 site, Figure S7-(2) shows the reactions of C3 and N sites, p represents phenolate, s represents same-side, o represents opposite-side).

## Table S14

**Table S14.** The  $k_{\text{obs-est}}$  ( $\text{M}^{-1} \text{s}^{-1}$ ) and reaction energies  $\Delta H$  (at 298 K and 1 atm, in kcal/mol) for the chlorination reactions of Tyr-Am and NacTyr.

| Reactions                                                                        | $k_{\text{obs-est}}$ | $\Delta H$ |
|----------------------------------------------------------------------------------|----------------------|------------|
| (1) Tyr-Am $\rightarrow$ <i>N</i> -Cl-Tyr-Am                                     | $5.2 \times 10^7$    | -17.7      |
| (2) Tyr-Am $\rightarrow$ 3-Cl-Tyr-Am                                             | 96.7                 | -46.1      |
| (3) Tyr-Am $\rightarrow$ 5-Cl-Tyr-Am                                             | 117.0                | -44.2      |
| (4) <i>N</i> -Cl-Tyr-Am $\rightarrow$ <i>N,N</i> -di-Cl-Tyr-Am                   | $1.1 \times 10^3$    | -19.9      |
| (5) <i>N</i> -Cl-Tyr-Am $\rightarrow$ 3, <i>N</i> -di-Cl-Tyr-Am                  | 250.0                | -44.4      |
| (6) <i>N</i> -Cl-Tyr-Am $\rightarrow$ 5, <i>N</i> -di-Cl-Tyr-Am                  | 223.3                | -38.3      |
| (7) 3-Cl-Tyr-Am $\rightarrow$ 3, <i>N</i> -di-Cl-Tyr-Am                          | $5.0 \times 10^7$    | -17.8      |
| (8) 3-Cl-Tyr-Am $\rightarrow$ 3,5-di-Cl-Tyr-Am                                   | 185.7                | -43.1      |
| (9) 5-Cl-Tyr-Am $\rightarrow$ 5, <i>N</i> -di-Cl-Tyr-Am                          | $2.1 \times 10^7$    | -17.5      |
| (10) 5-Cl-Tyr-Am $\rightarrow$ 3,5-di-Cl-Tyr-Am                                  | 34.3                 | -42.9      |
| (11) <i>N,N</i> -di-Cl-Tyr-Am $\rightarrow$ 3, <i>N,N</i> -tri-Cl-Tyr-Am         | 69.8                 | -44.0      |
| (12) <i>N,N</i> -di-Cl-Tyr-Am $\rightarrow$ 5, <i>N,N</i> -tri-Cl-Tyr-Am         | 117.1                | -37.3      |
| (13) 3, <i>N</i> -di-Cl-Tyr-Am $\rightarrow$ 3, <i>N,N</i> -tri-Cl-Tyr-Am        | 28.1                 | -18.4      |
| (14) 3, <i>N</i> -di-Cl-Tyr-Am $\rightarrow$ 3,5, <i>N</i> -tri-Cl-Tyr-Am        | 51.6                 | -37.6      |
| (15) 5, <i>N</i> -di-Cl-Tyr-Am $\rightarrow$ 5, <i>N,N</i> -tri-Cl-Tyr-Am        | 22.7                 | -16.1      |
| (16) 5, <i>N</i> -di-Cl-Tyr-Am $\rightarrow$ 3,5, <i>N</i> -tri-Cl-Tyr-Am        | 38.3                 | -43.3      |
| (17) 3,5-di-Cl-Tyr-Am $\rightarrow$ 3,5, <i>N</i> -tri-Cl-Tyr-Am                 | $8.6 \times 10^6$    | -17.6      |
| (18) 3,5, <i>N</i> -tri-Cl-Tyr-Am $\rightarrow$ 3,5, <i>N,N</i> -tetra-Cl-Tyr-Am | 53.3                 | -16.1      |
| (19) 5, <i>N,N</i> -tri-Cl-Tyr-Am $\rightarrow$ 3,5, <i>N,N</i> -tetra-Cl-Tyr-Am | 53.7                 | -44.8      |
| (20) 3, <i>N,N</i> -tri-Cl-Tyr-Am $\rightarrow$ 3,5, <i>N,N</i> -tetra-Cl-Tyr-Am | $1.1 \times 10^3$    | -36.6      |
| (21) NacTyr $\rightarrow$ 3-Cl-NacTyr                                            | 7.7                  | -55.8      |
| (22) NacTyr $\rightarrow$ 5-Cl-NacTyr                                            | 343.3                | -42.6      |
| (23) 3-Cl-NacTyr $\rightarrow$ 3,5-di-Cl-NacTyr                                  | 134.6                | -40.5      |
| (24) 5-Cl-NacTyr $\rightarrow$ 3,5-di-Cl-NacTyr                                  | 1.4                  | -53.4      |

**Figure S8**

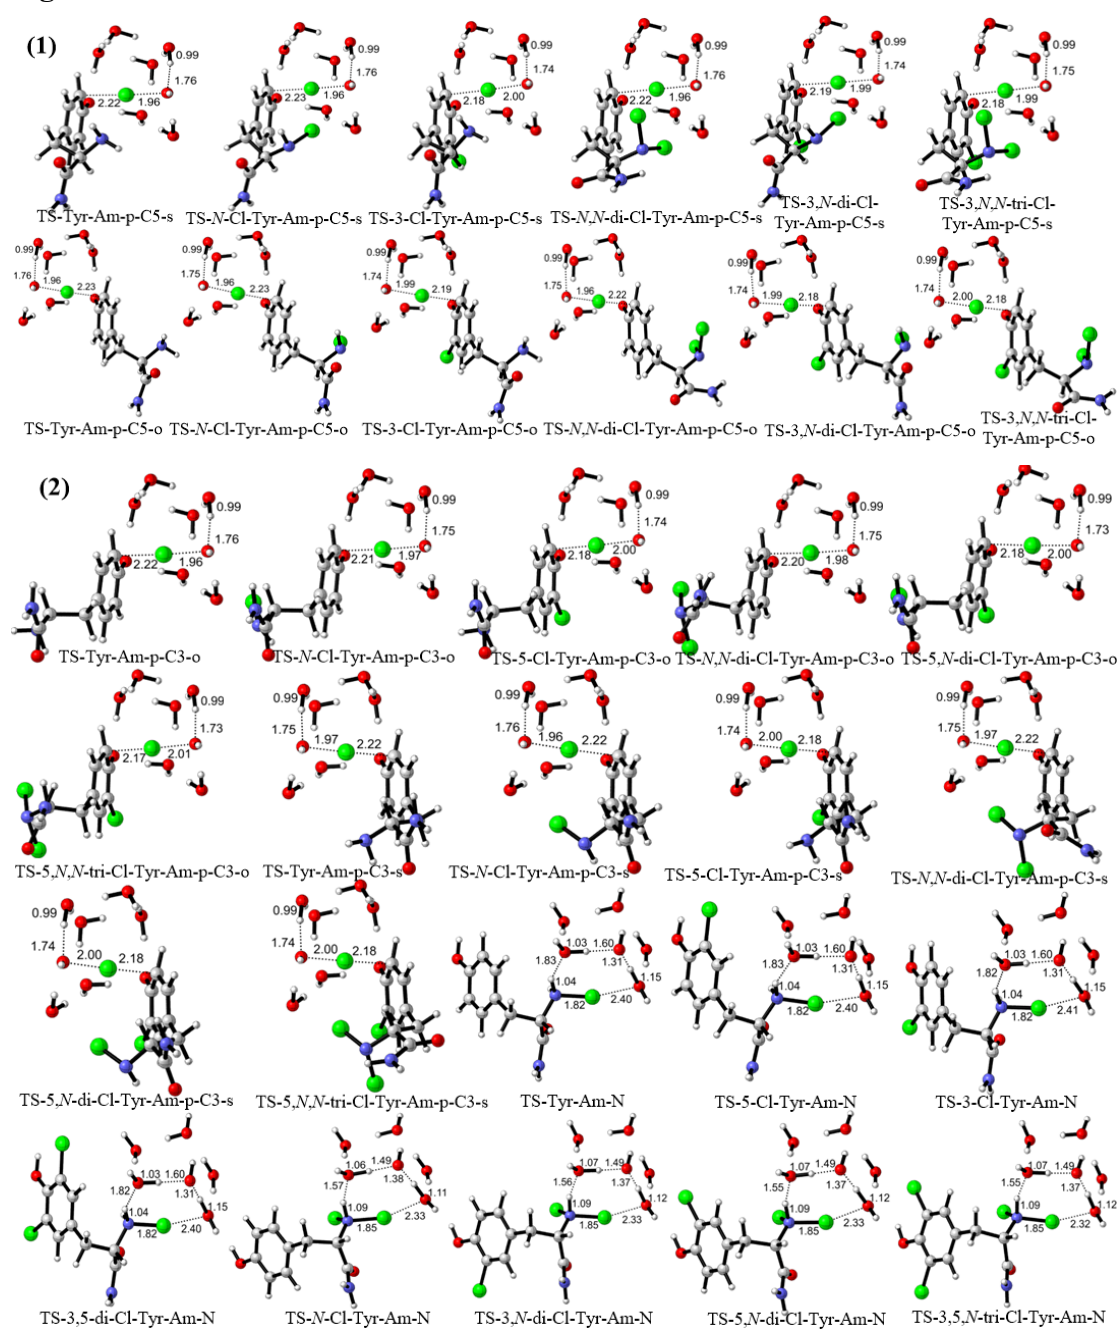

**Figure S8.** Structures of transition states and important geometries for the chlorination of Tyr-Am compounds (Figure S8-(1) shows the reactions of C5 site, Figure S8-(2) shows the reactions of C3 and N sites, p represents phenolate, s represents same-side, o represents opposite-side).

**Figure S9**

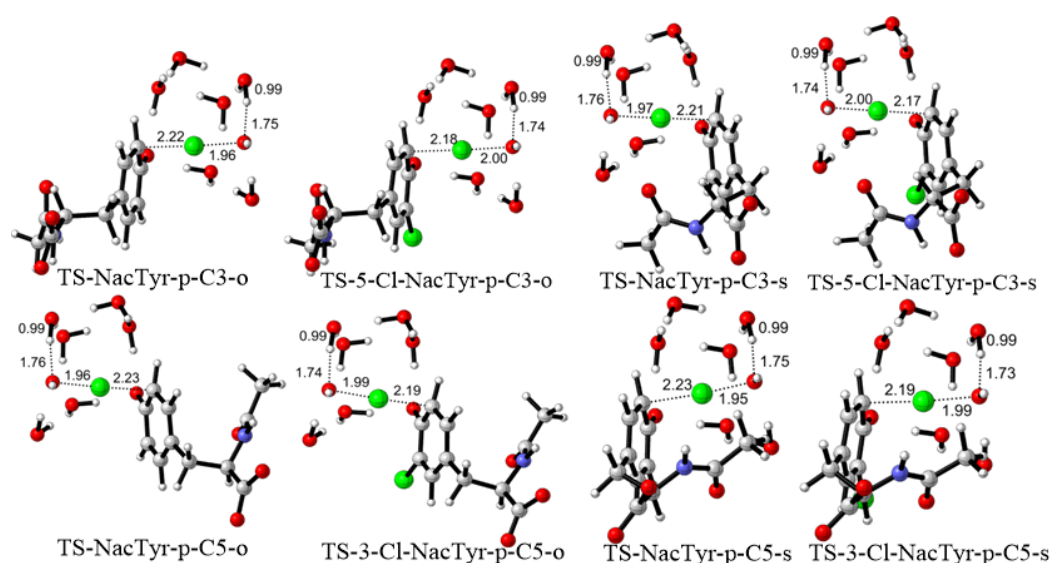

**Figure S9.** Structures of transition states and important geometries for the chlorination of NacTyr compounds (p represents phenolate, s represents same-side, o represents opposite-side).

**Table S15**

**Table S15** NPA charges, FED<sup>2</sup> (HOMO) and BDEs of N, C3, and C5 sites in Tyr, Tyr-Am and NacTyr compounds

| Compounds          | NPA    | FED <sup>2</sup> | BDEs  |
|--------------------|--------|------------------|-------|
| Tyr-N              | -0.940 | 2.000            | 151.4 |
| N-Cl-Tyr-N         | -0.670 | 5.860            | 136.8 |
| 3-Cl-Tyr-N         | -0.940 | 3.360            | 150.9 |
| 5-Cl-Tyr-N         | -0.940 | 7.370            | 150.7 |
| 3,N-di-Cl-Tyr-N    | -0.670 | 7.080            | 136.0 |
| 5,N-di-Cl-Tyr-N    | -0.660 | 5.700            | 136.0 |
| 3,5-di-Cl-Tyr-N    | -0.940 | 18.100           | 150.4 |
| 3,5,N-tri-Cl-Tyr-N | -0.670 | 10.230           | 136.5 |
| TA-N               | -0.930 | 0.200            | 145.6 |
| N-Cl-TA-N          | -0.680 | 3.350            | 127.2 |
| 3-Cl-TA-N          | -0.930 | 0.200            | 145.1 |
| 5-Cl-TA-N          | -0.930 | 0.140            | 144.9 |
| 3,N-di-Cl-TA-N     | -0.680 | 3.730            | 126.8 |
| 5,N-di-Cl-TA-N     | -0.680 | 4.650            | 126.7 |
| 3,5-di-Cl-TA-N     | -0.930 | 0.180            | 143.8 |
| 3,5,N-tri-Cl-TA-N  | -0.680 | 5.970            | 126.1 |
| Tyr-C3             | -0.310 | 7.489            | 156.7 |
| N-Cl-Tyr-C3        | -0.310 | 9.596            | 156.7 |
| 5-Cl-Tyr-C3        | -0.291 | 3.155            | 152.7 |
| N,N-di-Cl-Tyr-C3   | -0.310 | 8.067            | 156.3 |

|                              |        |        |       |
|------------------------------|--------|--------|-------|
| 5, <i>N</i> -di-Cl-Tyr-C3    | -0.291 | 6.291  | 152.6 |
| 5, <i>N,N</i> -tri-Cl-Tyr-C3 | -0.291 | 5.341  | 152.1 |
| TA-C3                        | -0.310 | 10.686 | 155.8 |
| <i>N</i> -Cl-TA-C3           | -0.310 | 8.834  | 155.4 |
| 5-Cl-TA-C3                   | -0.292 | 7.027  | 152.4 |
| <i>N,N</i> -di-Cl-TA-C3      | -0.310 | 9.183  | 155.2 |
| 5, <i>N</i> -di-Cl-TA-C3     | -0.293 | 5.819  | 151.6 |
| 5, <i>N,N</i> -tri-Cl-TA-C3  | -0.293 | 6.261  | 151.1 |
| NacTyr-C3                    | -0.310 | 7.788  | 156.4 |
| 5-Cl-NacTyr-C3               | -0.291 | 4.625  | 152.5 |
| Tyr-C5                       | -0.330 | 9.807  | 156.6 |
| <i>N</i> -Cl-Tyr-C5          | -0.330 | 7.599  | 156.6 |
| 3-Cl-Tyr-C5                  | -0.311 | 6.475  | 152.7 |
| <i>N,N</i> -di-Cl-Tyr-C5     | -0.320 | 8.788  | 156.2 |
| 3, <i>N</i> -di-Cl-Tyr-C5    | -0.311 | 4.647  | 152.6 |
| 3, <i>N,N</i> -tri-Cl-Tyr-C5 | -0.311 | 5.872  | 152.1 |
| TA-C5                        | -0.320 | 10.846 | 155.8 |
| <i>N</i> -Cl-TA-C5           | -0.320 | 9.835  | 155.4 |
| 3-Cl-TA-C5                   | -0.311 | 6.888  | 152.4 |
| <i>N,N</i> -di-Cl-TA-C5      | -0.320 | 10.105 | 155.1 |
| 3, <i>N</i> -di-Cl-TA-C5     | -0.302 | 6.646  | 151.6 |
| 3, <i>N,N</i> -tri-Cl-TA-C5  | -0.312 | 6.897  | 151.1 |
| NacTyr-C5                    | -0.330 | 9.877  | 156.4 |
| 3-Cl-NacTyr-C5               | -0.311 | 6.936  | 152.5 |

## Table S16

**Table S16** The  $R^2$  values of the  $\lg k_{\text{obs-est}}$  depending on NPA charges, FED<sup>2</sup> (HOMO), and BDEs for 44 reactive sites in Tyr and tyrosyl dipeptides

|          | NPA   | FED <sup>2</sup> | BDEs  | NPA+FED <sup>2</sup> | NPA+BDEs | FED <sup>2</sup> +BDEs |
|----------|-------|------------------|-------|----------------------|----------|------------------------|
| 44 sites | 0.688 | 0.159            | 0.006 | 0.693                | 0.905    | 0.165                  |

## Standard orientation of TS-Tyr-p-C3

Cartesian coordinates of the transition states optimized at the M06-2X(D3)/6-31+G(d) level:

Standard orientation of transition state of TS-Tyr-p-C3

State=1-A

Charge = -2 Multiplicity = 1

Lowest Harmonic Vibrational Frequency (LHVF) = -341.60 cm<sup>-1</sup>

Standard orientation:

| Center<br>Number | Atomic<br>Number | Atomic<br>Type | Coordinates (Angstroms) |           |           |
|------------------|------------------|----------------|-------------------------|-----------|-----------|
|                  |                  |                | X                       | Y         | Z         |
| 1                | 1                | 0              | 0.607226                | 1.188364  | -1.464981 |
| 2                | 8                | 0              | 2.539894                | 0.690281  | 2.467511  |
| 3                | 1                | 0              | 2.031076                | 1.242395  | 3.086412  |
| 4                | 17               | 0              | 1.349259                | 0.543772  | 0.921336  |
| 5                | 8                | 0              | 3.205774                | 0.746369  | -2.524307 |
| 6                | 1                | 0              | 2.993972                | 1.553129  | -2.004489 |
| 7                | 1                | 0              | 2.532943                | 0.070659  | -2.259955 |
| 8                | 8                | 0              | 4.496898                | 1.834352  | 0.941394  |
| 9                | 1                | 0              | 3.831777                | 1.481070  | 1.579370  |
| 10               | 1                | 0              | 4.753738                | 1.053275  | 0.397678  |
| 11               | 8                | 0              | 2.884201                | 3.038129  | -0.936529 |
| 12               | 1                | 0              | 3.445307                | 2.658407  | -0.214857 |
| 13               | 1                | 0              | 1.975648                | 2.998784  | -0.597488 |
| 14               | 6                | 0              | 0.075255                | 0.422274  | -0.904363 |
| 15               | 6                | 0              | -0.449651               | -1.956909 | -0.642159 |
| 16               | 6                | 0              | -2.067311               | -0.247771 | 0.072822  |
| 17               | 6                | 0              | -1.641334               | -1.606846 | -0.062189 |
| 18               | 1                | 0              | -0.163769               | -2.999260 | -0.756374 |
| 19               | 1                | 0              | -2.301088               | -2.390586 | 0.306409  |
| 20               | 1                | 0              | -1.501604               | 1.779460  | -0.285278 |
| 21               | 8                | 0              | 1.513398                | -1.263776 | -1.779557 |
| 22               | 6                | 0              | 0.432006                | -0.953000 | -1.165435 |
| 23               | 6                | 0              | -1.219060               | 0.731567  | -0.372848 |
| 24               | 8                | 0              | 2.598015                | -2.077946 | 2.674578  |
| 25               | 1                | 0              | 2.565917                | -1.097248 | 2.728129  |
| 26               | 1                | 0              | 2.807941                | -2.256776 | 1.734480  |
| 27               | 8                | 0              | 3.297154                | -2.390386 | -0.041236 |
| 28               | 1                | 0              | 3.566697                | -3.269454 | -0.351178 |
| 29               | 1                | 0              | 2.615547                | -2.076363 | -0.685173 |
| 30               | 8                | 0              | 5.057180                | -0.305390 | -0.746843 |

|    |   |   |           |           |           |
|----|---|---|-----------|-----------|-----------|
| 31 | 1 | 0 | 4.546367  | -1.073820 | -0.412481 |
| 32 | 1 | 0 | 4.485538  | 0.063843  | -1.460737 |
| 33 | 6 | 0 | -3.422812 | 0.076816  | 0.647149  |
| 34 | 1 | 0 | -3.724937 | -0.707247 | 1.355144  |
| 35 | 1 | 0 | -3.372948 | 1.019313  | 1.202187  |
| 36 | 6 | 0 | -4.522126 | 0.205224  | -0.423274 |
| 37 | 1 | 0 | -4.220294 | 0.985666  | -1.130746 |
| 38 | 7 | 0 | -4.661516 | -1.049553 | -1.156585 |
| 39 | 1 | 0 | -4.922688 | -1.777997 | -0.490431 |
| 40 | 1 | 0 | -5.456755 | -0.968314 | -1.789457 |
| 41 | 6 | 0 | -5.803270 | 0.696528  | 0.278827  |
| 42 | 8 | 0 | -6.683539 | -0.154114 | 0.585046  |
| 43 | 8 | 0 | -5.870550 | 1.934749  | 0.531944  |

---

## Standard orientation of TS-N-Cl-Tyr-p-C3

Cartesian coordinates of the transition states optimized at the M06-2X(D3)/6-31+G(d) level:

Standard orientation of transition state of TS-N-Cl-Tyr-p-C3

State=1-A

Charge = -2 Multiplicity = 1

Lowest Harmonic Vibrational Frequency (LHVF) = -343.80 cm<sup>-1</sup>

Standard orientation:

| Center<br>Number | Atomic<br>Number | Atomic<br>Type | Coordinates (Angstroms) |           |           |
|------------------|------------------|----------------|-------------------------|-----------|-----------|
|                  |                  |                | X                       | Y         | Z         |
| 1                | 1                | 0              | 0.810774                | 0.192113  | -1.769447 |
| 2                | 8                | 0              | 2.910151                | 1.909218  | 1.705753  |
| 3                | 1                | 0              | 2.388351                | 2.684027  | 1.978243  |
| 4                | 17               | 0              | 1.671719                | 0.929290  | 0.547240  |
| 5                | 8                | 0              | 3.364760                | -0.670476 | -2.586315 |
| 6                | 1                | 0              | 3.112466                | 0.279294  | -2.563980 |
| 7                | 1                | 0              | 2.745497                | -1.128633 | -1.965714 |
| 8                | 8                | 0              | 4.708818                | 2.179305  | -0.334043 |
| 9                | 1                | 0              | 4.099004                | 2.185608  | 0.442254  |
| 10               | 1                | 0              | 5.006381                | 1.241898  | -0.399655 |
| 11               | 8                | 0              | 2.941174                | 2.102065  | -2.449667 |
| 12               | 1                | 0              | 3.553808                | 2.196527  | -1.678244 |
| 13               | 1                | 0              | 2.051495                | 2.226895  | -2.082057 |
| 14               | 6                | 0              | 0.336798                | -0.168994 | -0.859016 |
| 15               | 6                | 0              | -0.075181               | -2.060791 | 0.642364  |
| 16               | 6                | 0              | -1.736653               | -0.259593 | 0.438507  |
| 17               | 6                | 0              | -1.259391               | -1.478554 | 1.013226  |
| 18               | 1                | 0              | -1.876265               | -1.967682 | 1.765475  |
| 19               | 1                | 0              | -1.266546               | 1.287409  | -0.958573 |
| 20               | 8                | 0              | 1.814953                | -2.035822 | -0.792767 |
| 21               | 6                | 0              | 0.744437                | -1.467833 | -0.375514 |
| 22               | 6                | 0              | -0.947987               | 0.352681  | -0.499268 |
| 23               | 8                | 0              | 3.128730                | -0.319508 | 3.341539  |
| 24               | 1                | 0              | 3.043337                | 0.539293  | 2.871366  |
| 25               | 1                | 0              | 3.310091                | -0.962352 | 2.624940  |
| 26               | 8                | 0              | 3.742017                | -1.985571 | 1.152785  |
| 27               | 1                | 0              | 4.082990                | -2.881100 | 1.305505  |
| 28               | 1                | 0              | 3.019937                | -2.084292 | 0.485180  |
| 29               | 8                | 0              | 5.339890                | -0.512641 | -0.651570 |
| 30               | 1                | 0              | 4.892364                | -0.997505 | 0.074608  |



|    |    |   |           |           |           |
|----|----|---|-----------|-----------|-----------|
| 31 | 1  | 0 | 4.719659  | -0.608879 | -1.412687 |
| 32 | 6  | 0 | -3.059734 | 0.333835  | 0.869121  |
| 33 | 1  | 0 | -3.511253 | -0.277127 | 1.660594  |
| 34 | 1  | 0 | -2.869457 | 1.322466  | 1.305038  |
| 35 | 6  | 0 | -4.101534 | 0.515424  | -0.259849 |
| 36 | 1  | 0 | -3.598607 | 0.766082  | -1.197412 |
| 37 | 7  | 0 | -4.989929 | -0.625759 | -0.514349 |
| 38 | 6  | 0 | -5.019211 | 1.690580  | 0.132637  |
| 39 | 8  | 0 | -6.031896 | 1.421396  | 0.832866  |
| 40 | 8  | 0 | -4.652394 | 2.837951  | -0.232380 |
| 41 | 17 | 0 | -4.081617 | -2.103104 | -0.830974 |
| 42 | 1  | 0 | 0.247497  | -3.004104 | 1.075079  |
| 43 | 1  | 0 | -5.482626 | -0.822641 | 0.360564  |

---

## Standard orientation of TS-5-Cl-Tyr-p-C3

Cartesian coordinates of the transition states optimized at the M06-2X(D3)/6-31+G(d) level:

Standard orientation of transition state of TS-5-Cl-Tyr-p-C3

State=1-A

Charge = -2 Multiplicity = 1

Lowest Harmonic Vibrational Frequency (LHVF) = -353.55 cm<sup>-1</sup>

Standard orientation:

| Center<br>Number | Atomic<br>Number | Atomic<br>Type | Coordinates (Angstroms) |           |           |
|------------------|------------------|----------------|-------------------------|-----------|-----------|
|                  |                  |                | X                       | Y         | Z         |
| 1                | 1                | 0              | -0.614349               | -1.256489 | -1.590448 |
| 2                | 8                | 0              | -2.569933               | -1.301538 | 2.386525  |
| 3                | 1                | 0              | -2.071107               | -1.941743 | 2.922270  |
| 4                | 17               | 0              | -1.348341               | -0.964773 | 0.851916  |
| 5                | 8                | 0              | -3.207312               | -0.681866 | -2.609580 |
| 6                | 1                | 0              | -2.993490               | -1.553342 | -2.207050 |
| 7                | 1                | 0              | -2.545701               | -0.050519 | -2.242248 |
| 8                | 8                | 0              | -4.479781               | -2.259739 | 0.699047  |
| 9                | 1                | 0              | -3.823187               | -1.973510 | 1.380960  |
| 10               | 1                | 0              | -4.759034               | -1.423673 | 0.258753  |
| 11               | 8                | 0              | -2.862294               | -3.152718 | -1.337902 |
| 12               | 1                | 0              | -3.421774               | -2.885897 | -0.565749 |
| 13               | 1                | 0              | -1.952240               | -3.156481 | -1.000841 |
| 14               | 6                | 0              | -0.086981               | -0.600739 | -0.900927 |
| 15               | 6                | 0              | 0.470054                | 1.694134  | -0.289902 |
| 16               | 6                | 0              | 2.068469                | -0.106594 | 0.145002  |
| 17               | 6                | 0              | 1.659123                | 1.262222  | 0.225684  |
| 18               | 1                | 0              | 2.320390                | 1.978071  | 0.709493  |
| 19               | 1                | 0              | 1.481122                | -2.050721 | -0.508604 |
| 20               | 8                | 0              | -1.498269               | 1.209321  | -1.535502 |
| 21               | 6                | 0              | -0.436563               | 0.803959  | -0.975420 |
| 22               | 6                | 0              | 1.210528                | -0.999345 | -0.435029 |
| 23               | 8                | 0              | -2.520082               | 1.422612  | 2.912240  |
| 24               | 1                | 0              | -2.514451               | 0.440993  | 2.852978  |
| 25               | 1                | 0              | -2.789056               | 1.709861  | 2.014986  |
| 26               | 8                | 0              | -3.386115               | 2.050977  | 0.300580  |
| 27               | 1                | 0              | -3.648691               | 2.973215  | 0.150182  |
| 28               | 1                | 0              | -2.674966               | 1.867261  | -0.355841 |
| 29               | 8                | 0              | -5.100865               | 0.060843  | -0.714895 |
| 30               | 1                | 0              | -4.605434               | 0.787496  | -0.280014 |

|    |    |   |           |           |           |
|----|----|---|-----------|-----------|-----------|
| 31 | 1  | 0 | -4.523255 | -0.195189 | -1.471264 |
| 32 | 6  | 0 | 3.428056  | -0.515019 | 0.650706  |
| 33 | 1  | 0 | 3.730109  | 0.142349  | 1.477394  |
| 34 | 1  | 0 | 3.383998  | -1.536813 | 1.039508  |
| 35 | 6  | 0 | 4.515590  | -0.455111 | -0.437104 |
| 36 | 1  | 0 | 4.222168  | -1.131795 | -1.248038 |
| 37 | 7  | 0 | 4.610825  | 0.896313  | -0.979832 |
| 38 | 1  | 0 | 4.851991  | 1.529078  | -0.215417 |
| 39 | 1  | 0 | 5.405735  | 0.933478  | -1.617087 |
| 40 | 6  | 0 | 5.820499  | -1.012761 | 0.167060  |
| 41 | 8  | 0 | 6.732109  | -0.201102 | 0.485514  |
| 42 | 8  | 0 | 5.876460  | -2.266859 | 0.327180  |
| 43 | 17 | 0 | 0.024896  | 3.379847  | -0.196101 |

---

## Standard orientation of TS-*N,N*-di-Cl-Tyr-p-C3

Cartesian coordinates of the transition states optimized at the M06-2X(D3)/6-31+G(d) level:

Standard orientation of transition state of TS-*N,N*-di-Cl-Tyr-p-C3

State=1-A

Charge = -2 Multiplicity = 1

Lowest Harmonic Vibrational Frequency (LHVF) = -353.38 cm<sup>-1</sup>

Standard orientation:

| Center<br>Number | Atomic<br>Number | Atomic<br>Type | Coordinates (Angstroms) |           |           |
|------------------|------------------|----------------|-------------------------|-----------|-----------|
|                  |                  |                | X                       | Y         | Z         |
| 1                | 1                | 0              | 1.190487                | 0.098388  | -1.782482 |
| 2                | 8                | 0              | 3.451472                | 2.132099  | 1.418012  |
| 3                | 1                | 0              | 3.023961                | 2.998646  | 1.530456  |
| 4                | 17               | 0              | 2.111068                | 1.110397  | 0.392704  |
| 5                | 8                | 0              | 3.668568                | -1.181844 | -2.393417 |
| 6                | 1                | 0              | 3.544730                | -0.217005 | -2.534509 |
| 7                | 1                | 0              | 2.986128                | -1.446783 | -1.728779 |
| 8                | 8                | 0              | 5.302330                | 1.803626  | -0.557086 |
| 9                | 1                | 0              | 4.682334                | 2.017765  | 0.181586  |
| 10               | 1                | 0              | 5.479369                | 0.839371  | -0.457160 |
| 11               | 8                | 0              | 3.593134                | 1.605100  | -2.704781 |
| 12               | 1                | 0              | 4.190819                | 1.747369  | -1.928489 |
| 13               | 1                | 0              | 2.714403                | 1.885320  | -2.402711 |
| 14               | 6                | 0              | 0.686020                | -0.055445 | -0.830589 |
| 15               | 6                | 0              | 0.078648                | -1.629546 | 0.950369  |
| 16               | 6                | 0              | -1.392874               | 0.266455  | 0.418716  |
| 17               | 6                | 0              | -1.039697               | -0.877889 | 1.200236  |
| 18               | 1                | 0              | -1.694858               | -1.165112 | 2.020592  |
| 19               | 1                | 0              | -0.769520               | 1.511680  | -1.199874 |
| 20               | 8                | 0              | 1.952559                | -2.035716 | -0.444376 |
| 21               | 6                | 0              | 0.950949                | -1.300560 | -0.140517 |
| 22               | 6                | 0              | -0.540771               | 0.642994  | -0.584221 |
| 23               | 8                | 0              | 3.382047                | 0.187280  | 3.390264  |
| 24               | 1                | 0              | 3.403175                | 0.963082  | 2.786549  |
| 25               | 1                | 0              | 3.497470                | -0.580998 | 2.793102  |
| 26               | 8                | 0              | 3.830803                | -1.899771 | 1.548380  |
| 27               | 1                | 0              | 4.022663                | -2.779796 | 1.909338  |
| 28               | 1                | 0              | 3.114903                | -2.033694 | 0.881227  |
| 29               | 8                | 0              | 5.616214                | -0.961278 | -0.429768 |
| 30               | 1                | 0              | 5.108108                | -1.272858 | 0.349297  |

|    |    |   |           |           |           |
|----|----|---|-----------|-----------|-----------|
| 31 | 1  | 0 | 4.998780  | -1.103278 | -1.185628 |
| 32 | 6  | 0 | -2.682179 | 1.007680  | 0.678802  |
| 33 | 1  | 0 | -3.067520 | 0.757639  | 1.673218  |
| 34 | 1  | 0 | -2.493250 | 2.084670  | 0.674653  |
| 35 | 6  | 0 | -3.791315 | 0.788065  | -0.366488 |
| 36 | 1  | 0 | -3.426085 | 1.107954  | -1.348458 |
| 37 | 7  | 0 | -4.277259 | -0.597783 | -0.608620 |
| 38 | 6  | 0 | -5.010557 | 1.690226  | -0.033893 |
| 39 | 8  | 0 | -6.133031 | 1.165886  | 0.156110  |
| 40 | 8  | 0 | -4.745185 | 2.921417  | 0.010960  |
| 41 | 17 | 0 | -3.129869 | -1.508081 | -1.600231 |
| 42 | 17 | 0 | -4.497353 | -1.473082 | 0.900275  |
| 43 | 1  | 0 | 0.308689  | -2.511122 | 1.542818  |

---

## Standard orientation of TS-5,*N*-di-Cl-Tyr-p-C3

Cartesian coordinates of the transition states optimized at the M06-2X(D3)/6-31+G(d) level:

Standard orientation of transition state of TS-5,*N*-di-Cl-Tyr-p-C3

State=1-A

Charge = -2 Multiplicity = 1

Lowest Harmonic Vibrational Frequency (LHVF) = -357.88 cm<sup>-1</sup>

Standard orientation:

| Center<br>Number | Atomic<br>Number | Atomic<br>Type | Coordinates (Angstroms) |           |           |
|------------------|------------------|----------------|-------------------------|-----------|-----------|
|                  |                  |                | X                       | Y         | Z         |
| 1                | 1                | 0              | -0.752450               | -0.940389 | -1.685273 |
| 2                | 8                | 0              | -2.885346               | -1.747720 | 2.111941  |
| 3                | 1                | 0              | -2.365666               | -2.425827 | 2.576695  |
| 4                | 17               | 0              | -1.613306               | -1.091896 | 0.725972  |
| 5                | 8                | 0              | -3.314623               | -0.348817 | -2.736483 |
| 6                | 1                | 0              | -3.066706               | -1.259399 | -2.459426 |
| 7                | 1                | 0              | -2.708055               | 0.253501  | -2.246897 |
| 8                | 8                | 0              | -4.658215               | -2.504258 | 0.188419  |
| 9                | 1                | 0              | -4.049537               | -2.305203 | 0.941848  |
| 10               | 1                | 0              | -4.961458               | -1.620705 | -0.124930 |
| 11               | 8                | 0              | -2.894541               | -2.978291 | -1.869614 |
| 12               | 1                | 0              | -3.505596               | -2.870417 | -1.098077 |
| 13               | 1                | 0              | -2.004238               | -3.004701 | -1.484079 |
| 14               | 6                | 0              | -0.295900               | -0.382807 | -0.870258 |
| 15               | 6                | 0              | 0.101585                | 1.802817  | 0.136443  |
| 16               | 6                | 0              | 1.779652                | 0.036510  | 0.353916  |
| 17               | 6                | 0              | 1.288936                | 1.349729  | 0.636599  |
| 18               | 1                | 0              | 1.889869                | 2.010768  | 1.257599  |
| 19               | 1                | 0              | 1.328409                | -1.801626 | -0.634488 |
| 20               | 8                | 0              | -1.773728               | 1.437815  | -1.282489 |
| 21               | 6                | 0              | -0.720698               | 0.996533  | -0.735019 |
| 22               | 6                | 0              | 0.999726                | -0.789350 | -0.406698 |
| 23               | 8                | 0              | -3.124187               | 0.839966  | 3.063335  |
| 24               | 1                | 0              | -3.029022               | -0.112285 | 2.834335  |
| 25               | 1                | 0              | -3.334899               | 1.271155  | 2.209498  |
| 26               | 8                | 0              | -3.804512               | 1.904497  | 0.536386  |
| 27               | 1                | 0              | -4.126401               | 2.819871  | 0.513549  |
| 28               | 1                | 0              | -3.053427               | 1.868618  | -0.099813 |
| 29               | 8                | 0              | -5.331516               | -0.010053 | -0.859462 |
| 30               | 1                | 0              | -4.911379               | 0.665698  | -0.285858 |

|    |    |   |           |           |           |
|----|----|---|-----------|-----------|-----------|
| 31 | 1  | 0 | -4.698528 | -0.107144 | -1.608813 |
| 32 | 6  | 0 | 3.119399  | -0.409351 | 0.895427  |
| 33 | 1  | 0 | 3.542609  | 0.361496  | 1.550928  |
| 34 | 1  | 0 | 2.960375  | -1.300459 | 1.514998  |
| 35 | 6  | 0 | 4.171956  | -0.772692 | -0.177557 |
| 36 | 1  | 0 | 3.688281  | -1.262576 | -1.026574 |
| 37 | 7  | 0 | 4.988090  | 0.332687  | -0.695311 |
| 38 | 1  | 0 | 5.461865  | 0.756717  | 0.106396  |
| 39 | 6  | 0 | 5.167576  | -1.762379 | 0.461731  |
| 40 | 8  | 0 | 6.128604  | -1.266896 | 1.109373  |
| 41 | 8  | 0 | 4.913631  | -2.987768 | 0.329346  |
| 42 | 17 | 0 | -0.439157 | 3.427221  | 0.477290  |
| 43 | 17 | 0 | 3.997251  | 1.638336  | -1.343141 |

---

## Standard orientation of TS-5,*N,N*-tri-Cl-Tyr-p-C3

Cartesian coordinates of the transition states optimized at the M06-2X(D3)/6-31+G(d) level:

Standard orientation of transition state of TS-5,*N,N*-tri-Cl-Tyr-p-C3

State=1-A

Charge = -2 Multiplicity = 1

Lowest Harmonic Vibrational Frequency (LHVF) = -367.37 cm<sup>-1</sup>

Standard orientation:

| Center<br>Number | Atomic<br>Number | Atomic<br>Type | Coordinates (Angstroms) |           |           |
|------------------|------------------|----------------|-------------------------|-----------|-----------|
|                  |                  |                | X                       | Y         | Z         |
| 1                | 1                | 0              | 1.134692                | -1.154999 | 1.562506  |
| 2                | 8                | 0              | 3.456442                | -1.530972 | -2.197495 |
| 3                | 1                | 0              | 3.033633                | -2.240460 | -2.710478 |
| 4                | 17               | 0              | 2.066743                | -1.094333 | -0.818387 |
| 5                | 8                | 0              | 3.594250                | -0.318399 | 2.733499  |
| 6                | 1                | 0              | 3.463836                | -1.237090 | 2.407142  |
| 7                | 1                | 0              | 2.935755                | 0.230551  | 2.249131  |
| 8                | 8                | 0              | 5.260535                | -2.160696 | -0.266248 |
| 9                | 1                | 0              | 4.648171                | -1.997128 | -1.026229 |
| 10               | 1                | 0              | 5.449365                | -1.265071 | 0.098248  |
| 11               | 8                | 0              | 3.507711                | -2.922080 | 1.710671  |
| 12               | 1                | 0              | 4.127788                | -2.706720 | 0.969280  |
| 13               | 1                | 0              | 2.639201                | -3.018716 | 1.288536  |
| 14               | 6                | 0              | 0.645831                | -0.613569 | 0.755012  |
| 15               | 6                | 0              | 0.038081                | 1.562868  | -0.169596 |
| 16               | 6                | 0              | -1.442144               | -0.356999 | -0.490610 |
| 17               | 6                | 0              | -1.082111               | 1.008521  | -0.718963 |
| 18               | 1                | 0              | -1.725859               | 1.625300  | -1.341887 |
| 19               | 1                | 0              | -0.821244               | -2.180571 | 0.427519  |
| 20               | 8                | 0              | 1.894234                | 1.340178  | 1.301350  |
| 21               | 6                | 0              | 0.915302                | 0.812949  | 0.699466  |
| 22               | 6                | 0              | -0.589446               | -1.133592 | 0.241860  |
| 23               | 8                | 0              | 3.398223                | 1.108741  | -3.019449 |
| 24               | 1                | 0              | 3.410569                | 0.142504  | -2.831902 |
| 25               | 1                | 0              | 3.544789                | 1.523411  | -2.144417 |
| 26               | 8                | 0              | 3.911590                | 2.115300  | -0.430700 |
| 27               | 1                | 0              | 4.122028                | 3.059552  | -0.352389 |
| 28               | 1                | 0              | 3.151230                | 1.961458  | 0.175271  |
| 29               | 8                | 0              | 5.611281                | 0.332236  | 0.932059  |
| 30               | 1                | 0              | 5.128977                | 0.982685  | 0.378133  |



|    |    |   |           |           |           |
|----|----|---|-----------|-----------|-----------|
| 31 | 1  | 0 | 4.975681  | 0.125235  | 1.655937  |
| 32 | 6  | 0 | -2.753315 | -0.891904 | -1.012651 |
| 33 | 1  | 0 | -3.128272 | -0.257941 | -1.823366 |
| 34 | 1  | 0 | -2.597263 | -1.888542 | -1.432987 |
| 35 | 6  | 0 | -3.851122 | -1.066077 | 0.053014  |
| 36 | 1  | 0 | -3.493644 | -1.760108 | 0.822052  |
| 37 | 7  | 0 | -4.281483 | 0.125144  | 0.832109  |
| 38 | 6  | 0 | -5.108859 | -1.726120 | -0.579554 |
| 39 | 8  | 0 | -6.225941 | -1.171618 | -0.454843 |
| 40 | 8  | 0 | -4.878488 | -2.813209 | -1.172739 |
| 41 | 17 | 0 | -3.089520 | 0.550760  | 2.066443  |
| 42 | 17 | 0 | -4.507782 | 1.522532  | -0.210101 |
| 43 | 17 | 0 | 0.418732  | 3.242707  | -0.446871 |

---

## Standard orientation of TS-Tyr-p-C5

Cartesian coordinates of the transition states optimized at the M06-2X(D3)/6-31+G(d) level:

Standard orientation of transition state of TS-Tyr-p-C5

State=1-A

Charge = -2 Multiplicity = 1

Lowest Harmonic Vibrational Frequency (LHVF) = -336.26 cm<sup>-1</sup>

Standard orientation:

| Center<br>Number | Atomic<br>Number | Atomic<br>Type | Coordinates (Angstroms) |           |           |
|------------------|------------------|----------------|-------------------------|-----------|-----------|
|                  |                  |                | X                       | Y         | Z         |
| 1                | 1                | 0              | 1.044323                | -0.872455 | -2.029346 |
| 2                | 8                | 0              | 1.619151                | 2.413311  | 0.862419  |
| 3                | 1                | 0              | 0.962796                | 3.091620  | 0.625489  |
| 4                | 17               | 0              | 0.975074                | 0.829201  | -0.083149 |
| 5                | 8                | 0              | 3.808889                | -1.351399 | -1.665785 |
| 6                | 1                | 0              | 3.473924                | -0.538790 | -2.105758 |
| 7                | 1                | 0              | 3.060476                | -1.686648 | -1.112772 |
| 8                | 8                | 0              | 3.991944                | 2.343260  | -0.494905 |
| 9                | 1                | 0              | 3.149641                | 2.487285  | -0.001116 |
| 10               | 1                | 0              | 4.380125                | 1.536902  | -0.082075 |
| 11               | 8                | 0              | 3.089819                | 1.119648  | -2.792288 |
| 12               | 1                | 0              | 3.381001                | 1.618639  | -1.988774 |
| 13               | 1                | 0              | 2.120074                | 1.149201  | -2.768517 |
| 14               | 6                | 0              | 0.325847                | -0.978568 | -1.219202 |
| 15               | 6                | 0              | -0.383547               | -2.241912 | 0.756731  |
| 16               | 6                | 0              | -2.043186               | -1.047335 | -0.610131 |
| 17               | 6                | 0              | -1.673157               | -1.843887 | 0.520311  |
| 18               | 1                | 0              | -0.135649               | -2.872653 | 1.606458  |
| 19               | 1                | 0              | -2.456239               | -2.154944 | 1.210779  |
| 20               | 1                | 0              | -1.287899               | -0.059128 | -2.343442 |
| 21               | 8                | 0              | 1.871366                | -2.302397 | 0.019966  |
| 22               | 6                | 0              | 0.671621                | -1.882597 | -0.148537 |
| 23               | 6                | 0              | -1.049897               | -0.664144 | -1.470553 |
| 24               | 8                | 0              | 1.417965                | 1.026690  | 3.258540  |
| 25               | 1                | 0              | 1.431345                | 1.625073  | 2.479277  |
| 26               | 1                | 0              | 1.910419                | 0.236640  | 2.953218  |
| 27               | 8                | 0              | 2.965742                | -1.091212 | 2.221357  |
| 28               | 1                | 0              | 3.281326                | -1.760249 | 2.849406  |
| 29               | 1                | 0              | 2.541995                | -1.595092 | 1.484036  |
| 30               | 8                | 0              | 4.957554                | -0.068345 | 0.508879  |

|    |   |   |           |           |           |
|----|---|---|-----------|-----------|-----------|
| 31 | 1 | 0 | 4.329666  | -0.345653 | 1.210122  |
| 32 | 1 | 0 | 4.654826  | -0.567704 | -0.285747 |
| 33 | 6 | 0 | -3.485387 | -0.659552 | -0.807431 |
| 34 | 1 | 0 | -3.605362 | -0.180902 | -1.788593 |
| 35 | 1 | 0 | -4.115327 | -1.556574 | -0.800289 |
| 36 | 6 | 0 | -4.012295 | 0.302987  | 0.272041  |
| 37 | 1 | 0 | -3.876506 | -0.166215 | 1.253245  |
| 38 | 7 | 0 | -3.250848 | 1.547770  | 0.252382  |
| 39 | 1 | 0 | -3.381688 | 1.982418  | -0.662238 |
| 40 | 1 | 0 | -3.674345 | 2.195491  | 0.916122  |
| 41 | 6 | 0 | -5.531222 | 0.462579  | 0.060403  |
| 42 | 8 | 0 | -5.957655 | 1.527891  | -0.464199 |
| 43 | 8 | 0 | -6.255014 | -0.515258 | 0.409214  |

---

## Standard orientation of TS-N-Cl-Tyr-p-C5

Cartesian coordinates of the transition states optimized at the M06-2X(D3)/6-31+G(d) level:

Standard orientation of transition state of TS-N-Cl-Tyr-p-C5

State=1-A

Charge = -2 Multiplicity = 1

Lowest Harmonic Vibrational Frequency (LHVF) = -340.89 cm<sup>-1</sup>

Standard orientation:

| Center<br>Number | Atomic<br>Number | Atomic<br>Type | Coordinates (Angstroms) |           |           |
|------------------|------------------|----------------|-------------------------|-----------|-----------|
|                  |                  |                | X                       | Y         | Z         |
| 1                | 1                | 0              | 1.303640                | -1.228924 | -1.922106 |
| 2                | 8                | 0              | 1.902757                | 2.424353  | 0.488670  |
| 3                | 1                | 0              | 1.274916                | 3.072936  | 0.124698  |
| 4                | 17               | 0              | 1.248250                | 0.732479  | -0.236313 |
| 5                | 8                | 0              | 4.064707                | -1.694113 | -1.430404 |
| 6                | 1                | 0              | 3.756002                | -0.943322 | -1.984223 |
| 7                | 1                | 0              | 3.296364                | -1.938612 | -0.856147 |
| 8                | 8                | 0              | 4.310517                | 2.107443  | -0.769046 |
| 9                | 1                | 0              | 3.459693                | 2.342696  | -0.327621 |
| 10               | 1                | 0              | 4.659255                | 1.356159  | -0.234419 |
| 11               | 8                | 0              | 3.408799                | 0.613331  | -2.900477 |
| 12               | 1                | 0              | 3.709399                | 1.204174  | -2.165469 |
| 13               | 1                | 0              | 2.439460                | 0.658427  | -2.876547 |
| 14               | 6                | 0              | 0.574621                | -1.210491 | -1.114404 |
| 15               | 6                | 0              | -0.178213               | -2.173308 | 1.007663  |
| 16               | 6                | 0              | -1.802458               | -1.160502 | -0.534815 |
| 17               | 6                | 0              | -1.460198               | -1.799807 | 0.697661  |
| 18               | 1                | 0              | -2.254997               | -2.010628 | 1.412095  |
| 19               | 1                | 0              | -1.009170               | -0.428930 | -2.375151 |
| 20               | 8                | 0              | 2.085035                | -2.365678 | 0.323756  |
| 21               | 6                | 0              | 0.893559                | -1.957767 | 0.078021  |
| 22               | 6                | 0              | -0.792248               | -0.913328 | -1.424995 |
| 23               | 8                | 0              | 1.539505                | 1.368569  | 3.038591  |
| 24               | 1                | 0              | 1.609351                | 1.861232  | 2.191878  |
| 25               | 1                | 0              | 2.035386                | 0.540791  | 2.867962  |
| 26               | 8                | 0              | 3.099883                | -0.893133 | 2.391993  |
| 27               | 1                | 0              | 3.403558                | -1.469244 | 3.111291  |
| 28               | 1                | 0              | 2.702772                | -1.495232 | 1.715392  |
| 29               | 8                | 0              | 5.158049                | -0.158136 | 0.604332  |
| 30               | 1                | 0              | 4.501419                | -0.327149 | 1.313579  |

|    |    |   |           |           |           |
|----|----|---|-----------|-----------|-----------|
| 31 | 1  | 0 | 4.873878  | -0.754836 | -0.127576 |
| 32 | 6  | 0 | -3.246040 | -0.834836 | -0.836844 |
| 33 | 1  | 0 | -3.326334 | -0.380730 | -1.832575 |
| 34 | 1  | 0 | -3.808811 | -1.777762 | -0.870391 |
| 35 | 6  | 0 | -3.969479 | 0.081859  | 0.175283  |
| 36 | 1  | 0 | -3.695895 | -0.185593 | 1.199216  |
| 37 | 7  | 0 | -3.761138 | 1.528972  | 0.022389  |
| 38 | 6  | 0 | -5.482804 | -0.151779 | -0.000226 |
| 39 | 8  | 0 | -6.071233 | 0.532034  | -0.880365 |
| 40 | 8  | 0 | -6.004514 | -1.048345 | 0.713779  |
| 41 | 17 | 0 | -2.062731 | 1.958490  | 0.210315  |
| 42 | 1  | 0 | 0.048607  | -2.683312 | 1.940314  |
| 43 | 1  | 0 | -3.972832 | 1.767737  | -0.949678 |

---

## Standard orientation of TS-3-Cl-Tyr-p-C5

Cartesian coordinates of the transition states optimized at the M06-2X(D3)/6-31+G(d) level:

Standard orientation of transition state of TS-3-Cl-Tyr-p-C5

State=1-A

Charge = -2 Multiplicity = 1

Lowest Harmonic Vibrational Frequency (LHVF) = -353.50 cm<sup>-1</sup>

Standard orientation:

| Center<br>Number | Atomic<br>Number | Atomic<br>Type | Coordinates (Angstroms) |           |           |
|------------------|------------------|----------------|-------------------------|-----------|-----------|
|                  |                  |                | X                       | Y         | Z         |
| 1                | 1                | 0              | -1.054844               | -0.576402 | -2.204830 |
| 2                | 8                | 0              | -1.597996               | -1.914174 | 1.996797  |
| 3                | 1                | 0              | -0.928217               | -2.604192 | 2.143117  |
| 4                | 17               | 0              | -0.959510               | -1.041368 | 0.325447  |
| 5                | 8                | 0              | -3.817640               | -0.033361 | -2.141730 |
| 6                | 1                | 0              | -3.459589               | -0.948752 | -2.105829 |
| 7                | 1                | 0              | -3.085425               | 0.551560  | -1.837559 |
| 8                | 8                | 0              | -3.913058               | -2.623781 | 0.750734  |
| 9                | 1                | 0              | -3.080622               | -2.460208 | 1.258576  |
| 10               | 1                | 0              | -4.338531               | -1.737032 | 0.690295  |
| 11               | 8                | 0              | -3.036629               | -2.707119 | -1.858629 |
| 12               | 1                | 0              | -3.299926               | -2.736626 | -0.904728 |
| 13               | 1                | 0              | -2.066126               | -2.714202 | -1.855313 |
| 14               | 6                | 0              | -0.335337               | -0.093105 | -1.547354 |
| 15               | 6                | 0              | 0.384272                | 1.973834  | -0.470674 |
| 16               | 6                | 0              | 2.036456                | 0.275742  | -1.085253 |
| 17               | 6                | 0              | 1.672769                | 1.523091  | -0.483306 |
| 18               | 1                | 0              | 2.452384                | 2.133211  | -0.030344 |
| 19               | 1                | 0              | 1.276849                | -1.443320 | -2.093034 |
| 20               | 8                | 0              | -1.875264               | 1.682113  | -1.161596 |
| 21               | 6                | 0              | -0.692294               | 1.234436  | -1.089621 |
| 22               | 6                | 0              | 1.043067                | -0.486208 | -1.632156 |
| 23               | 8                | 0              | -1.371707               | 0.551512  | 3.250380  |
| 24               | 1                | 0              | -1.387705               | -0.369896 | 2.906551  |
| 25               | 1                | 0              | -1.917327               | 1.049525  | 2.607239  |
| 26               | 8                | 0              | -3.072147               | 1.749817  | 1.335785  |
| 27               | 1                | 0              | -3.425226               | 2.631057  | 1.538181  |
| 28               | 1                | 0              | -2.625042               | 1.837996  | 0.462678  |
| 29               | 8                | 0              | -4.989258               | -0.080523 | 0.372078  |
| 30               | 1                | 0              | -4.390281               | 0.543312  | 0.835240  |

|    |    |   |           |           |           |
|----|----|---|-----------|-----------|-----------|
| 31 | 1  | 0 | -4.685639 | -0.040624 | -0.565056 |
| 32 | 6  | 0 | 3.482297  | -0.143252 | -1.064155 |
| 33 | 1  | 0 | 3.626023  | -1.004709 | -1.729002 |
| 34 | 1  | 0 | 4.105872  | 0.674661  | -1.442585 |
| 35 | 6  | 0 | 3.979242  | -0.522451 | 0.342950  |
| 36 | 1  | 0 | 3.743214  | 0.299436  | 1.028411  |
| 37 | 7  | 0 | 3.289987  | -1.720078 | 0.812750  |
| 38 | 6  | 0 | 5.516790  | -0.627548 | 0.287575  |
| 39 | 8  | 0 | 6.041129  | -1.773906 | 0.241431  |
| 40 | 8  | 0 | 6.152928  | 0.466110  | 0.262960  |
| 41 | 1  | 0 | 3.562176  | -2.495521 | 0.207033  |
| 42 | 17 | 0 | -0.004793 | 3.516214  | 0.247163  |
| 43 | 1  | 0 | 3.654809  | -1.961838 | 1.733609  |

---

## Standard orientation of TS-*N,N*-di-Cl-Tyr-p-C5

Cartesian coordinates of the transition states optimized at the M06-2X(D3)/6-31+G(d) level:

Standard orientation of transition state of TS-*N,N*-di-Cl-Tyr-p-C5

State=1-A

Charge = -2 Multiplicity = 1

Lowest Harmonic Vibrational Frequency (LHVF) = -338.35 cm<sup>-1</sup>

Standard orientation:

| Center<br>Number | Atomic<br>Number | Atomic<br>Type | Coordinates (Angstroms) |           |           |
|------------------|------------------|----------------|-------------------------|-----------|-----------|
|                  |                  |                | X                       | Y         | Z         |
| 1                | 1                | 0              | -1.517676               | 1.021975  | -2.092871 |
| 2                | 8                | 0              | -1.891015               | -2.288412 | 0.812636  |
| 3                | 1                | 0              | -1.163255               | -2.899881 | 0.603005  |
| 4                | 17               | 0              | -1.369877               | -0.669550 | -0.140226 |
| 5                | 8                | 0              | -4.341351               | 1.292675  | -1.708393 |
| 6                | 1                | 0              | -3.961428               | 0.501309  | -2.150256 |
| 7                | 1                | 0              | -3.606364               | 1.685177  | -1.174807 |
| 8                | 8                | 0              | -4.274377               | -2.389867 | -0.522769 |
| 9                | 1                | 0              | -3.417912               | -2.483732 | -0.042465 |
| 10               | 1                | 0              | -4.699028               | -1.605328 | -0.103905 |
| 11               | 8                | 0              | -3.477379               | -1.130046 | -2.841023 |
| 12               | 1                | 0              | -3.728969               | -1.639998 | -2.031075 |
| 13               | 1                | 0              | -2.507939               | -1.087799 | -2.820333 |
| 14               | 6                | 0              | -0.820772               | 1.179074  | -1.272298 |
| 15               | 6                | 0              | -0.222846               | 2.504898  | 0.701242  |
| 16               | 6                | 0              | 1.528173                | 1.410498  | -0.629079 |
| 17               | 6                | 0              | 1.093238                | 2.194529  | 0.485737  |
| 18               | 1                | 0              | 1.844993                | 2.565786  | 1.181656  |
| 19               | 1                | 0              | 0.867190                | 0.356984  | -2.362449 |
| 20               | 8                | 0              | -2.466551               | 2.403069  | -0.059913 |
| 21               | 6                | 0              | -1.239261               | 2.064560  | -0.213545 |
| 22               | 6                | 0              | 0.576127                | 0.950392  | -1.497862 |
| 23               | 8                | 0              | -1.680639               | -0.855719 | 3.184008  |
| 24               | 1                | 0              | -1.690504               | -1.462041 | 2.410656  |
| 25               | 1                | 0              | -2.227284               | -0.097539 | 2.890154  |
| 26               | 8                | 0              | -3.402702               | 1.143728  | 2.184615  |
| 27               | 1                | 0              | -3.788289               | 1.782732  | 2.804747  |
| 28               | 1                | 0              | -3.048999               | 1.679347  | 1.432780  |
| 29               | 8                | 0              | -5.346862               | -0.036299 | 0.509567  |
| 30               | 1                | 0              | -4.719512               | 0.282423  | 1.193499  |



|    |    |   |           |           |           |
|----|----|---|-----------|-----------|-----------|
| 31 | 1  | 0 | -5.097039 | 0.475516  | -0.295579 |
| 32 | 6  | 0 | 3.000380  | 1.162716  | -0.840816 |
| 33 | 1  | 0 | 3.162107  | 0.698847  | -1.819607 |
| 34 | 1  | 0 | 3.527997  | 2.122015  | -0.854400 |
| 35 | 6  | 0 | 3.710150  | 0.330542  | 0.241192  |
| 36 | 1  | 0 | 3.597701  | 0.822462  | 1.213429  |
| 37 | 7  | 0 | 3.228630  | -1.055716 | 0.493480  |
| 38 | 6  | 0 | 5.234898  | 0.293898  | -0.046023 |
| 39 | 8  | 0 | 5.807738  | -0.807490 | -0.219925 |
| 40 | 8  | 0 | 5.781365  | 1.429681  | -0.071605 |
| 41 | 17 | 0 | 1.752518  | -1.027388 | 1.463569  |
| 42 | 17 | 0 | 2.868684  | -1.896671 | -1.010747 |
| 43 | 1  | 0 | -0.525064 | 3.125917  | 1.540463  |

---

## Standard orientation of TS-3,N-di-Cl-Tyr-p-C5

Cartesian coordinates of the transition states optimized at the M06-2X(D3)/6-31+G(d) level:

Standard orientation of transition state of TS-3,N-di-Cl-Tyr-p-C5

State=1-A

Charge = -2 Multiplicity = 1

Lowest Harmonic Vibrational Frequency (LHVF) = -350.57 cm<sup>-1</sup>

Standard orientation:

| Center<br>Number | Atomic<br>Number | Atomic<br>Type | Coordinates (Angstroms) |           |           |
|------------------|------------------|----------------|-------------------------|-----------|-----------|
|                  |                  |                | X                       | Y         | Z         |
| 1                | 1                | 0              | -1.282315               | -0.178142 | -2.333714 |
| 2                | 8                | 0              | -1.856869               | -2.124214 | 1.618752  |
| 3                | 1                | 0              | -1.223668               | -2.862882 | 1.631053  |
| 4                | 17               | 0              | -1.211040               | -1.020179 | 0.096578  |
| 5                | 8                | 0              | -4.054752               | 0.397475  | -2.157754 |
| 6                | 1                | 0              | -3.727792               | -0.525532 | -2.247357 |
| 7                | 1                | 0              | -3.302706               | 0.913370  | -1.783578 |
| 8                | 8                | 0              | -4.228704               | -2.556013 | 0.358079  |
| 9                | 1                | 0              | -3.380626               | -2.489065 | 0.862643  |
| 10               | 1                | 0              | -4.622566               | -1.655077 | 0.423484  |
| 11               | 8                | 0              | -3.362992               | -2.320117 | -2.244175 |
| 12               | 1                | 0              | -3.638493               | -2.467832 | -1.304723 |
| 13               | 1                | 0              | -2.392868               | -2.344184 | -2.227800 |
| 14               | 6                | 0              | -0.560231               | 0.195134  | -1.610328 |
| 15               | 6                | 0              | 0.189121                | 2.080643  | -0.259173 |
| 16               | 6                | 0              | 1.816093                | 0.456751  | -1.094354 |
| 17               | 6                | 0              | 1.473068                | 1.620745  | -0.337120 |
| 18               | 1                | 0              | 2.258675                | 2.163707  | 0.185109  |
| 19               | 1                | 0              | 1.030528                | -1.098592 | -2.322777 |
| 20               | 8                | 0              | -2.076888               | 1.916632  | -0.966170 |
| 21               | 6                | 0              | -0.899096               | 1.447008  | -0.965998 |
| 22               | 6                | 0              | 0.811354                | -0.205790 | -1.741421 |
| 23               | 8                | 0              | -1.495300               | 0.120556  | 3.215763  |
| 24               | 1                | 0              | -1.551181               | -0.741881 | 2.746974  |
| 25               | 1                | 0              | -2.037914               | 0.720140  | 2.662602  |
| 26               | 8                | 0              | -3.206544               | 1.630020  | 1.547885  |
| 27               | 1                | 0              | -3.525206               | 2.473861  | 1.906417  |
| 28               | 1                | 0              | -2.785753               | 1.850061  | 0.684997  |
| 29               | 8                | 0              | -5.207006               | 0.052498  | 0.345528  |
| 30               | 1                | 0              | -4.575413               | 0.574095  | 0.885755  |

|    |    |   |           |           |           |
|----|----|---|-----------|-----------|-----------|
| 31 | 1  | 0 | -4.906177 | 0.207290  | -0.580318 |
| 32 | 6  | 0 | 3.263071  | 0.035111  | -1.189788 |
| 33 | 1  | 0 | 3.345520  | -0.859347 | -1.819420 |
| 34 | 1  | 0 | 3.818196  | 0.835934  | -1.696178 |
| 35 | 6  | 0 | 3.989640  | -0.238567 | 0.146339  |
| 36 | 1  | 0 | 3.723388  | 0.516639  | 0.890588  |
| 37 | 7  | 0 | 3.782069  | -1.559542 | 0.755606  |
| 38 | 1  | 0 | 4.013733  | -2.260914 | 0.047887  |
| 39 | 6  | 0 | 5.502469  | -0.132490 | -0.134341 |
| 40 | 8  | 0 | 6.092653  | -1.182014 | -0.506230 |
| 41 | 8  | 0 | 6.020360  | 1.009649  | -0.023151 |
| 42 | 17 | 0 | -0.177887 | 3.521652  | 0.654889  |
| 43 | 17 | 0 | 2.082077  | -1.852174 | 1.113709  |

---

## Standard orientation of TS-3,*N,N*-tri-Cl-Tyr-p-C5

Cartesian coordinates of the transition states optimized at the M06-2X(D3)/6-31+G(d) level:

Standard orientation of transition state of TS-3,*N,N*-tri-Cl-Tyr-p-C5

State=1-A

Charge = -2 Multiplicity = 1

Lowest Harmonic Vibrational Frequency (LHVF) = -350.92 cm<sup>-1</sup>

Standard orientation:

| Center<br>Number | Atomic<br>Number | Atomic<br>Type | Coordinates (Angstroms) |           |           |
|------------------|------------------|----------------|-------------------------|-----------|-----------|
|                  |                  |                | X                       | Y         | Z         |
| 1                | 1                | 0              | -1.467965               | -0.187884 | -2.364543 |
| 2                | 8                | 0              | -1.743834               | -2.077454 | 1.652102  |
| 3                | 1                | 0              | -0.980187               | -2.678735 | 1.700292  |
| 4                | 17               | 0              | -1.275061               | -0.947290 | 0.088678  |
| 5                | 8                | 0              | -4.278225               | 0.070004  | -2.150853 |
| 6                | 1                | 0              | -3.834892               | -0.803893 | -2.234583 |
| 7                | 1                | 0              | -3.589308               | 0.688213  | -1.812974 |
| 8                | 8                | 0              | -4.038075               | -2.854954 | 0.402289  |
| 9                | 1                | 0              | -3.200206               | -2.690224 | 0.899305  |
| 10               | 1                | 0              | -4.528294               | -2.002574 | 0.469140  |
| 11               | 8                | 0              | -3.256416               | -2.538751 | -2.220295 |
| 12               | 1                | 0              | -3.487772               | -2.709659 | -1.273051 |
| 13               | 1                | 0              | -2.289439               | -2.456410 | -2.232795 |
| 14               | 6                | 0              | -0.782692               | 0.279581  | -1.660659 |
| 15               | 6                | 0              | -0.221507               | 2.278631  | -0.378429 |
| 16               | 6                | 0              | 1.555701                | 0.804492  | -1.179848 |
| 17               | 6                | 0              | 1.101026                | 1.952221  | -0.456158 |
| 18               | 1                | 0              | 1.833955                | 2.583950  | 0.043225  |
| 19               | 1                | 0              | 0.929629                | -0.862510 | -2.352528 |
| 20               | 8                | 0              | -2.464662               | 1.849806  | -1.048812 |
| 21               | 6                | 0              | -1.244094               | 1.508716  | -1.051108 |
| 22               | 6                | 0              | 0.622416                | 0.018055  | -1.792958 |
| 23               | 8                | 0              | -1.618564               | 0.225635  | 3.196252  |
| 24               | 1                | 0              | -1.585573               | -0.642829 | 2.734929  |
| 25               | 1                | 0              | -2.219995               | 0.759090  | 2.636554  |
| 26               | 8                | 0              | -3.494668               | 1.497328  | 1.502332  |
| 27               | 1                | 0              | -3.911371               | 2.306686  | 1.839229  |
| 28               | 1                | 0              | -3.119849               | 1.738928  | 0.624399  |
| 29               | 8                | 0              | -5.298410               | -0.370019 | 0.392645  |
| 30               | 1                | 0              | -4.723792               | 0.241578  | 0.900671  |

|    |    |   |           |           |           |
|----|----|---|-----------|-----------|-----------|
| 31 | 1  | 0 | -5.050356 | -0.198246 | -0.545815 |
| 32 | 6  | 0 | 3.034962  | 0.528547  | -1.271017 |
| 33 | 1  | 0 | 3.212858  | -0.285783 | -1.980957 |
| 34 | 1  | 0 | 3.542788  | 1.413551  | -1.667981 |
| 35 | 6  | 0 | 3.746251  | 0.214290  | 0.056983  |
| 36 | 1  | 0 | 3.632165  | 1.059801  | 0.743185  |
| 37 | 7  | 0 | 3.269557  | -0.950521 | 0.853235  |
| 38 | 6  | 0 | 5.269043  | 0.067554  | -0.201946 |
| 39 | 8  | 0 | 5.837217  | -1.024730 | 0.033980  |
| 40 | 8  | 0 | 5.816071  | 1.111056  | -0.649374 |
| 41 | 17 | 0 | -0.729381 | 3.702507  | 0.495011  |
| 42 | 17 | 0 | 1.806950  | -0.525705 | 1.747858  |
| 43 | 17 | 0 | 2.890468  | -2.325706 | -0.176820 |

---

## Standard orientation of TS-Tyr-N

Cartesian coordinates of the transition states optimized at the B3LYP(D3BJ)/6-31+G(d) level:

Standard orientation of transition state of TS-Tyr-N

State=1-A

Charge = -1 Multiplicity = 1

Lowest Harmonic Vibrational Frequency (LHVF) = -912.81 cm<sup>-1</sup>

Standard orientation:

| Center<br>Number | Atomic<br>Number | Atomic<br>Type | Coordinates (Angstroms) |           |           |
|------------------|------------------|----------------|-------------------------|-----------|-----------|
|                  |                  |                | X                       | Y         | Z         |
| 1                | 8                | 0              | 4.324863                | -1.374401 | -0.210725 |
| 2                | 1                | 0              | 4.650162                | -2.196485 | 0.192449  |
| 3                | 8                | 0              | 4.159999                | 0.394071  | 1.480074  |
| 4                | 1                | 0              | 4.347745                | 1.191773  | 0.953460  |
| 5                | 1                | 0              | 4.264471                | -0.555839 | 0.626231  |
| 6                | 8                | 0              | 1.612086                | 0.866329  | 1.971897  |
| 7                | 1                | 0              | 2.606332                | 0.663327  | 1.820813  |
| 8                | 1                | 0              | 1.554026                | 1.376338  | 2.796341  |
| 9                | 6                | 0              | -1.847268               | -1.333640 | 1.531392  |
| 10               | 1                | 0              | -2.483418               | -2.177786 | 1.813701  |
| 11               | 6                | 0              | -0.726142               | -1.920412 | 0.642075  |
| 12               | 6                | 0              | -1.273156               | -2.590889 | -0.635713 |
| 13               | 8                | 0              | -1.141083               | -1.954757 | -1.719887 |
| 14               | 8                | 0              | -1.835428               | -3.707884 | -0.470277 |
| 15               | 1                | 0              | -0.145645               | -2.635650 | 1.226564  |
| 16               | 7                | 0              | 0.195848                | -0.815398 | 0.243303  |
| 17               | 1                | 0              | -0.189025               | -0.354476 | -0.592962 |
| 18               | 1                | 0              | 0.363415                | -0.121855 | 1.000208  |
| 19               | 17               | 0              | 1.885533                | -1.315064 | -0.160427 |
| 20               | 8                | 0              | 4.047771                | 2.704260  | -0.546842 |
| 21               | 1                | 0              | 3.060139                | 2.712597  | -0.454175 |
| 22               | 1                | 0              | 4.264772                | 3.505229  | -1.052799 |
| 23               | 8                | 0              | 1.311082                | 2.574672  | -0.163506 |
| 24               | 1                | 0              | 1.356584                | 2.017000  | 0.656189  |
| 25               | 1                | 0              | 1.006475                | 3.446069  | 0.139624  |
| 26               | 8                | 0              | 4.609489                | 0.503818  | -2.224699 |
| 27               | 1                | 0              | 4.567593                | -0.251555 | -1.592420 |
| 28               | 1                | 0              | 4.405013                | 1.289382  | -1.665657 |
| 29               | 1                | 0              | -1.380320               | -0.951375 | 2.445474  |
| 30               | 6                | 0              | -2.660641               | -0.247362 | 0.864964  |

|    |   |   |           |           |           |
|----|---|---|-----------|-----------|-----------|
| 31 | 6 | 0 | -2.295725 | 1.100583  | 0.986983  |
| 32 | 6 | 0 | -3.776967 | -0.561280 | 0.075014  |
| 33 | 6 | 0 | -3.012269 | 2.108393  | 0.338621  |
| 34 | 1 | 0 | -1.439516 | 1.373089  | 1.599840  |
| 35 | 6 | 0 | -4.506877 | 0.432900  | -0.575774 |
| 36 | 1 | 0 | -4.081279 | -1.599229 | -0.032760 |
| 37 | 6 | 0 | -4.119007 | 1.769518  | -0.443357 |
| 38 | 1 | 0 | -2.719564 | 3.150504  | 0.441760  |
| 39 | 1 | 0 | -5.372861 | 0.182522  | -1.181616 |
| 40 | 8 | 0 | -4.870402 | 2.724716  | -1.102969 |
| 41 | 1 | 0 | -4.498782 | 3.606859  | -0.925895 |

---

## Standard orientation of TS-5-Cl-Tyr-N

Cartesian coordinates of the transition states optimized at the B3LYP(D3BJ)/6-31+G(d) level:

Standard orientation of transition state of TS-5-Cl-Tyr-N

State=1-A

Charge = -1 Multiplicity = 1

Lowest Harmonic Vibrational Frequency (LHVF) = -975.82 cm<sup>-1</sup>

Standard orientation:

| Center<br>Number | Atomic<br>Number | Atomic<br>Type | Coordinates (Angstroms) |           |           |
|------------------|------------------|----------------|-------------------------|-----------|-----------|
|                  |                  |                | X                       | Y         | Z         |
| 1                | 8                | 0              | 4.756241                | 0.860733  | 0.039071  |
| 2                | 1                | 0              | 5.246835                | 1.541327  | -0.451067 |
| 3                | 8                | 0              | 4.122633                | -0.969565 | -1.464714 |
| 4                | 1                | 0              | 4.163029                | -1.742566 | -0.873137 |
| 5                | 1                | 0              | 4.470785                | 0.001236  | -0.715739 |
| 6                | 8                | 0              | 1.519667                | -0.933699 | -1.843194 |
| 7                | 1                | 0              | 2.541886                | -0.937060 | -1.743934 |
| 8                | 1                | 0              | 1.307150                | -1.446017 | -2.640189 |
| 9                | 6                | 0              | -1.379369               | 1.894659  | -1.533857 |
| 10               | 1                | 0              | -1.915803               | 2.806131  | -1.813330 |
| 11               | 6                | 0              | -0.155132               | 2.346586  | -0.702112 |
| 12               | 6                | 0              | -0.547934               | 3.176487  | 0.539675  |
| 13               | 8                | 0              | -0.490290               | 2.594251  | 1.659876  |
| 14               | 8                | 0              | -0.920427               | 4.359241  | 0.310407  |
| 15               | 1                | 0              | 0.516045                | 2.920063  | -1.342642 |
| 16               | 7                | 0              | 0.580060                | 1.129525  | -0.248439 |
| 17               | 1                | 0              | 0.156515                | 0.802492  | 0.631446  |
| 18               | 1                | 0              | 0.596949                | 0.362668  | -0.953519 |
| 19               | 17               | 0              | 2.346027                | 1.335517  | 0.067614  |
| 20               | 8                | 0              | 3.580063                | -3.043444 | 0.739094  |
| 21               | 1                | 0              | 2.611554                | -2.837474 | 0.684120  |
| 22               | 1                | 0              | 3.641186                | -3.834484 | 1.300600  |
| 23               | 8                | 0              | 0.925715                | -2.314579 | 0.457153  |
| 24               | 1                | 0              | 1.054087                | -1.877844 | -0.424228 |
| 25               | 1                | 0              | 0.354726                | -3.080617 | 0.280995  |
| 26               | 8                | 0              | 4.730149                | -0.903125 | 2.174641  |
| 27               | 1                | 0              | 4.823329                | -0.206108 | 1.483405  |
| 28               | 1                | 0              | 4.318444                | -1.659639 | 1.695381  |
| 29               | 1                | 0              | -1.006788               | 1.431969  | -2.453192 |
| 30               | 6                | 0              | -2.292985               | 0.936796  | -0.803128 |



|    |    |   |           |           |           |
|----|----|---|-----------|-----------|-----------|
| 31 | 6  | 0 | -2.137305 | -0.444499 | -0.961332 |
| 32 | 6  | 0 | -3.278368 | 1.400071  | 0.082127  |
| 33 | 6  | 0 | -2.936862 | -1.330124 | -0.242250 |
| 34 | 1  | 0 | -1.391295 | -0.836986 | -1.645785 |
| 35 | 6  | 0 | -4.079198 | 0.513408  | 0.794808  |
| 36 | 1  | 0 | -3.420606 | 2.468710  | 0.215601  |
| 37 | 6  | 0 | -3.915402 | -0.867983 | 0.645489  |
| 38 | 8  | 0 | -4.734297 | -1.692681 | 1.374726  |
| 39 | 1  | 0 | -4.518340 | -2.627257 | 1.201725  |
| 40 | 17 | 0 | -2.719432 | -3.067235 | -0.459842 |
| 41 | 1  | 0 | -4.842518 | 0.874520  | 1.477426  |

---

## Standard orientation of TS-3-Cl-Tyr-N

Cartesian coordinates of the transition states optimized at the B3LYP(D3BJ)/6-31+G(d) level:

Standard orientation of transition state of TS-3-Cl-Tyr-N

State=1-A

Charge = -1 Multiplicity = 1

Lowest Harmonic Vibrational Frequency (LHVF) = -911.48 cm<sup>-1</sup>

Standard orientation:

| Center<br>Number | Atomic<br>Number | Atomic<br>Type | Coordinates (Angstroms) |           |           |
|------------------|------------------|----------------|-------------------------|-----------|-----------|
|                  |                  |                | X                       | Y         | Z         |
| 1                | 8                | 0              | 4.787491                | -1.409618 | -0.510023 |
| 2                | 1                | 0              | 5.126210                | -2.248220 | -0.154634 |
| 3                | 8                | 0              | 4.796408                | 0.312165  | 1.237502  |
| 4                | 1                | 0              | 4.954564                | 1.122271  | 0.720226  |
| 5                | 1                | 0              | 4.812366                | -0.613820 | 0.351079  |
| 6                | 8                | 0              | 2.308278                | 0.809428  | 1.958563  |
| 7                | 1                | 0              | 3.282796                | 0.597874  | 1.717476  |
| 8                | 1                | 0              | 2.326806                | 1.293546  | 2.800221  |
| 9                | 6                | 0              | -1.209859               | -1.298531 | 1.777475  |
| 10               | 1                | 0              | -1.824443               | -2.133836 | 2.125203  |
| 11               | 6                | 0              | -0.168556               | -1.902409 | 0.807092  |
| 12               | 6                | 0              | -0.822453               | -2.584185 | -0.413654 |
| 13               | 8                | 0              | -0.771695               | -1.963730 | -1.513326 |
| 14               | 8                | 0              | -1.381007               | -3.692192 | -0.186951 |
| 15               | 1                | 0              | 0.453275                | -2.614243 | 1.351775  |
| 16               | 7                | 0              | 0.722401                | -0.806006 | 0.325062  |
| 17               | 1                | 0              | 0.268193                | -0.338427 | -0.471395 |
| 18               | 1                | 0              | 0.965844                | -0.119296 | 1.067738  |
| 19               | 17               | 0              | 2.362675                | -1.320048 | -0.233998 |
| 20               | 8                | 0              | 4.542263                | 2.695588  | -0.695838 |
| 21               | 1                | 0              | 3.569910                | 2.730904  | -0.502704 |
| 22               | 1                | 0              | 4.732394                | 3.502034  | -1.203948 |
| 23               | 8                | 0              | 1.852020                | 2.637877  | -0.045280 |
| 24               | 1                | 0              | 1.959579                | 2.016535  | 0.721449  |
| 25               | 1                | 0              | 1.638916                | 3.496741  | 0.356429  |
| 26               | 8                | 0              | 4.862770                | 0.538640  | -2.482922 |
| 27               | 1                | 0              | 4.885372                | -0.240011 | -1.879763 |
| 28               | 1                | 0              | 4.739779                | 1.304912  | -1.874935 |
| 29               | 1                | 0              | -0.670253               | -0.900285 | 2.643229  |
| 30               | 6                | 0              | -2.069872               | -0.219267 | 1.160070  |

|    |    |   |           |           |           |
|----|----|---|-----------|-----------|-----------|
| 31 | 6  | 0 | -1.698389 | 1.130409  | 1.232772  |
| 32 | 6  | 0 | -3.236227 | -0.551828 | 0.460566  |
| 33 | 6  | 0 | -2.461239 | 2.121546  | 0.618466  |
| 34 | 1  | 0 | -0.800307 | 1.413610  | 1.775943  |
| 35 | 6  | 0 | -3.999848 | 0.439267  | -0.149787 |
| 36 | 1  | 0 | -3.552215 | -1.587876 | 0.387552  |
| 37 | 6  | 0 | -3.623185 | 1.786941  | -0.083146 |
| 38 | 1  | 0 | -2.166723 | 3.166246  | 0.679187  |
| 39 | 8  | 0 | -4.407969 | 2.726797  | -0.700839 |
| 40 | 1  | 0 | -4.022297 | 3.609895  | -0.560450 |
| 41 | 17 | 0 | -5.463102 | -0.008648 | -1.017257 |

---

## Standard orientation of TS-3,5-di-Cl-Tyr-N

Cartesian coordinates of the transition states optimized at the B3LYP(D3BJ)/6-31+G(d) level:

Standard orientation of transition state of TS-3,5-di-Cl-Tyr-N

State=1-A

Charge = -1 Multiplicity = 1

Lowest Harmonic Vibrational Frequency (LHVF) = -914.09 cm<sup>-1</sup>

Standard orientation:

| Center<br>Number | Atomic<br>Number | Atomic<br>Type | Coordinates (Angstroms) |           |           |
|------------------|------------------|----------------|-------------------------|-----------|-----------|
|                  |                  |                | X                       | Y         | Z         |
| 1                | 8                | 0              | -5.080544               | -1.266407 | 0.360065  |
| 2                | 1                | 0              | -5.530849               | -2.008555 | -0.076632 |
| 3                | 8                | 0              | -4.838687               | 0.612031  | -1.199974 |
| 4                | 1                | 0              | -4.906372               | 1.380656  | -0.605268 |
| 5                | 1                | 0              | -4.987685               | -0.390694 | -0.415017 |
| 6                | 8                | 0              | -2.300115               | 0.872011  | -1.856394 |
| 7                | 1                | 0              | -3.297449               | 0.758064  | -1.640101 |
| 8                | 1                | 0              | -2.246896               | 1.415466  | -2.659455 |
| 9                | 6                | 0              | 0.960450                | -1.641581 | -1.816053 |
| 10               | 1                | 0              | 1.533135                | -2.501227 | -2.174904 |
| 11               | 6                | 0              | -0.144785               | -2.207237 | -0.893004 |
| 12               | 6                | 0              | 0.432020                | -2.981235 | 0.312749  |
| 13               | 8                | 0              | 0.409863                | -2.396202 | 1.432467  |
| 14               | 8                | 0              | 0.906579                | -4.120278 | 0.053510  |
| 15               | 1                | 0              | -0.800825               | -2.851182 | -1.480014 |
| 16               | 7                | 0              | -0.963863               | -1.068210 | -0.385164 |
| 17               | 1                | 0              | -0.498788               | -0.674543 | 0.444427  |
| 18               | 1                | 0              | -1.131479               | -0.325318 | -1.095726 |
| 19               | 17               | 0              | -2.657884               | -1.456891 | 0.111230  |
| 20               | 8                | 0              | -4.308377               | 2.752489  | 0.941836  |
| 21               | 1                | 0              | -3.334362               | 2.656691  | 0.781048  |
| 22               | 1                | 0              | -4.396147               | 3.529328  | 1.519477  |
| 23               | 8                | 0              | -1.634198               | 2.329620  | 0.377216  |
| 24               | 1                | 0              | -1.803385               | 1.871093  | -0.486131 |
| 25               | 1                | 0              | -1.197417               | 3.164458  | 0.140069  |
| 26               | 8                | 0              | -4.987219               | 0.497706  | 2.499874  |
| 27               | 1                | 0              | -5.084186               | -0.208692 | 1.819574  |
| 28               | 1                | 0              | -4.741290               | 1.296967  | 1.978179  |
| 29               | 1                | 0              | 0.474677                | -1.178571 | -2.680875 |
| 30               | 6                | 0              | 1.868471                | -0.644398 | -1.133619 |

|    |    |   |          |           |           |
|----|----|---|----------|-----------|-----------|
| 31 | 6  | 0 | 1.569742 | 0.721850  | -1.158465 |
| 32 | 6  | 0 | 2.992241 | -1.075432 | -0.418781 |
| 33 | 6  | 0 | 2.373170 | 1.625082  | -0.470472 |
| 34 | 1  | 0 | 0.711589 | 1.088754  | -1.712690 |
| 35 | 6  | 0 | 3.789737 | -0.158755 | 0.256189  |
| 36 | 1  | 0 | 3.246080 | -2.129949 | -0.385777 |
| 37 | 6  | 0 | 3.501295 | 1.214056  | 0.252916  |
| 38 | 8  | 0 | 4.319651 | 2.062402  | 0.934698  |
| 39 | 1  | 0 | 4.011111 | 2.982106  | 0.833771  |
| 40 | 17 | 0 | 1.976781 | 3.340087  | -0.506091 |
| 41 | 17 | 0 | 5.197451 | -0.721928 | 1.139394  |

---

## Standard orientation of TS-N-Cl-Tyr-N

Cartesian coordinates of the transition states optimized at the B3LYP(D3BJ)/6-31+G(d) level:

Standard orientation of transition state of TS-N-Cl-Tyr-N

State=1-A

Charge = -1 Multiplicity = 1

Lowest Harmonic Vibrational Frequency (LHVF) = -487.89 cm<sup>-1</sup>

Standard orientation:

| Center<br>Number | Atomic<br>Number | Atomic<br>Type | Coordinates (Angstroms) |           |           |
|------------------|------------------|----------------|-------------------------|-----------|-----------|
|                  |                  |                | X                       | Y         | Z         |
| 1                | 8                | 0              | 4.240406                | -1.630481 | -0.248434 |
| 2                | 1                | 0              | 4.440925                | -2.511191 | 0.112484  |
| 3                | 8                | 0              | 4.088381                | 0.021245  | 1.584648  |
| 4                | 1                | 0              | 4.546421                | 0.796077  | 1.212352  |
| 5                | 1                | 0              | 4.200541                | -0.905010 | 0.617936  |
| 6                | 8                | 0              | 1.685854                | 0.954785  | 1.702786  |
| 7                | 1                | 0              | 2.652352                | 0.546102  | 1.694424  |
| 8                | 1                | 0              | 1.431197                | 1.084454  | 2.631368  |
| 9                | 6                | 0              | -1.702274               | -0.879160 | 1.647840  |
| 10               | 1                | 0              | -2.177097               | -1.679734 | 2.223859  |
| 11               | 6                | 0              | -0.655620               | -1.605843 | 0.774071  |
| 12               | 6                | 0              | -1.212088               | -2.695160 | -0.176579 |
| 13               | 8                | 0              | -0.954233               | -2.627271 | -1.403999 |
| 14               | 8                | 0              | -1.874510               | -3.591823 | 0.418641  |
| 15               | 1                | 0              | 0.026416                | -2.112642 | 1.465020  |
| 16               | 7                | 0              | 0.265949                | -0.614398 | 0.115823  |
| 17               | 1                | 0              | 0.626360                | 0.091751  | 0.842418  |
| 18               | 17               | 0              | 1.903201                | -1.320636 | -0.334674 |
| 19               | 8                | 0              | 4.872513                | 2.469147  | -0.073292 |
| 20               | 1                | 0              | 3.914859                | 2.727336  | -0.081652 |
| 21               | 1                | 0              | 5.346927                | 3.233633  | -0.441085 |
| 22               | 8                | 0              | 2.166885                | 3.055132  | 0.002512  |
| 23               | 1                | 0              | 1.926537                | 2.360640  | 0.667216  |
| 24               | 1                | 0              | 2.096778                | 3.897379  | 0.482352  |
| 25               | 8                | 0              | 5.099915                | 0.406698  | -1.974341 |
| 26               | 1                | 0              | 4.859259                | -0.396546 | -1.461890 |
| 27               | 1                | 0              | 5.014991                | 1.139576  | -1.319656 |
| 28               | 17               | 0              | -0.413909               | 0.355504  | -1.198387 |
| 29               | 1                | 0              | -1.157401               | -0.253166 | 2.362089  |
| 30               | 6                | 0              | -2.745584               | -0.047843 | 0.937871  |

|    |   |   |           |           |           |
|----|---|---|-----------|-----------|-----------|
| 31 | 6 | 0 | -2.725302 | 1.347825  | 1.046849  |
| 32 | 6 | 0 | -3.747694 | -0.635761 | 0.151374  |
| 33 | 6 | 0 | -3.658713 | 2.143922  | 0.380624  |
| 34 | 1 | 0 | -1.956921 | 1.824761  | 1.650359  |
| 35 | 6 | 0 | -4.684368 | 0.143644  | -0.526302 |
| 36 | 1 | 0 | -3.799513 | -1.716757 | 0.060826  |
| 37 | 6 | 0 | -4.634275 | 1.536390  | -0.413925 |
| 38 | 1 | 0 | -3.629020 | 3.227137  | 0.470738  |
| 39 | 1 | 0 | -5.455013 | -0.317817 | -1.136987 |
| 40 | 8 | 0 | -5.581898 | 2.268295  | -1.106370 |
| 41 | 1 | 0 | -5.439189 | 3.218138  | -0.949028 |

---

## Standard orientation of TS-3,*N*-di-Cl-Tyr-N

Cartesian coordinates of the transition states optimized at the B3LYP(D3BJ)/6-31+G(d) level:

Standard orientation of transition state of TS-3,*N*-di-Cl-Tyr-N

State=1-A

Charge = -1 Multiplicity = 1

Lowest Harmonic Vibrational Frequency (LHVF) = -415.73 cm<sup>-1</sup>

Standard orientation:

| Center<br>Number | Atomic<br>Number | Atomic<br>Type | Coordinates (Angstroms) |           |           |
|------------------|------------------|----------------|-------------------------|-----------|-----------|
|                  |                  |                | X                       | Y         | Z         |
| 1                | 8                | 0              | 4.594751                | -1.852638 | -0.393607 |
| 2                | 1                | 0              | 4.741847                | -2.739771 | -0.022563 |
| 3                | 8                | 0              | 4.769125                | -0.142362 | 1.391162  |
| 4                | 1                | 0              | 5.246951                | 0.579093  | 0.944128  |
| 5                | 1                | 0              | 4.706902                | -1.111927 | 0.441009  |
| 6                | 8                | 0              | 2.468526                | 0.984506  | 1.698548  |
| 7                | 1                | 0              | 3.394655                | 0.497290  | 1.613296  |
| 8                | 1                | 0              | 2.332291                | 1.189714  | 2.638254  |
| 9                | 6                | 0              | -1.178777               | -0.588062 | 1.862116  |
| 10               | 1                | 0              | -1.617032               | -1.337896 | 2.528534  |
| 11               | 6                | 0              | -0.184858               | -1.387796 | 0.991723  |
| 12               | 6                | 0              | -0.827764               | -2.470104 | 0.089492  |
| 13               | 8                | 0              | -0.708432               | -2.380806 | -1.157203 |
| 14               | 8                | 0              | -1.427148               | -3.372423 | 0.740472  |
| 15               | 1                | 0              | 0.487459                | -1.903767 | 1.684900  |
| 16               | 7                | 0              | 0.773419                | -0.472849 | 0.279023  |
| 17               | 1                | 0              | 1.246077                | 0.194847  | 0.974531  |
| 18               | 17               | 0              | 2.306420                | -1.327608 | -0.279624 |
| 19               | 8                | 0              | 5.599125                | 2.157924  | -0.459663 |
| 20               | 1                | 0              | 4.683164                | 2.524459  | -0.353734 |
| 21               | 1                | 0              | 6.108292                | 2.861310  | -0.896300 |
| 22               | 8                | 0              | 3.004272                | 3.026599  | -0.062625 |
| 23               | 1                | 0              | 2.760060                | 2.352329  | 0.621776  |
| 24               | 1                | 0              | 3.075190                | 3.864682  | 0.424321  |
| 25               | 8                | 0              | 5.338326                | 0.058510  | -2.312042 |
| 26               | 1                | 0              | 5.116455                | -0.708316 | -1.739944 |
| 27               | 1                | 0              | 5.425012                | 0.809319  | -1.678062 |
| 28               | 17               | 0              | 0.100388                | 0.565368  | -0.984383 |
| 29               | 1                | 0              | -0.599071               | 0.094776  | 2.491724  |
| 30               | 6                | 0              | -2.273309               | 0.179972  | 1.156279  |



|    |    |   |           |           |           |
|----|----|---|-----------|-----------|-----------|
| 31 | 6  | 0 | -2.277213 | 1.580131  | 1.165220  |
| 32 | 6  | 0 | -3.312818 | -0.482804 | 0.492145  |
| 33 | 6  | 0 | -3.274459 | 2.304913  | 0.516595  |
| 34 | 1  | 0 | -1.481111 | 2.114210  | 1.676435  |
| 35 | 6  | 0 | -4.306194 | 0.241527  | -0.160856 |
| 36 | 1  | 0 | -3.358032 | -1.566495 | 0.481888  |
| 37 | 6  | 0 | -4.301504 | 1.642155  | -0.162335 |
| 38 | 1  | 0 | -3.265648 | 3.391960  | 0.526680  |
| 39 | 8  | 0 | -5.305858 | 2.305819  | -0.819728 |
| 40 | 1  | 0 | -5.177955 | 3.266216  | -0.723142 |
| 41 | 17 | 0 | -5.599724 | -0.617919 | -0.988446 |

---

## Standard orientation of TS-5,*N*-di-Cl-Tyr-N

Cartesian coordinates of the transition states optimized at the B3LYP(D3BJ)/6-31+G(d) level:

Standard orientation of transition state of TS-5,*N*-di-Cl-Tyr-N

State=1-A

Charge = -1 Multiplicity = 1

Lowest Harmonic Vibrational Frequency (LHVF) = -440.23 cm<sup>-1</sup>

Standard orientation:

| Center<br>Number | Atomic<br>Number | Atomic<br>Type | Coordinates (Angstroms) |           |           |
|------------------|------------------|----------------|-------------------------|-----------|-----------|
|                  |                  |                | X                       | Y         | Z         |
| 1                | 8                | 0              | -4.779787               | 1.260845  | -0.215915 |
| 2                | 1                | 0              | -5.096661               | 2.091140  | 0.179703  |
| 3                | 8                | 0              | -4.443195               | -0.443513 | 1.547969  |
| 4                | 1                | 0              | -4.774510               | -1.256792 | 1.126970  |
| 5                | 1                | 0              | -4.664391               | 0.509986  | 0.612859  |
| 6                | 8                | 0              | -1.933467               | -1.014168 | 1.719876  |
| 7                | 1                | 0              | -2.949983               | -0.752357 | 1.688878  |
| 8                | 1                | 0              | -1.692953               | -1.139260 | 2.652824  |
| 9                | 6                | 0              | 1.257147                | 1.299631  | 1.655778  |
| 10               | 1                | 0              | 1.601383                | 2.143602  | 2.261932  |
| 11               | 6                | 0              | 0.074039                | 1.869835  | 0.842673  |
| 12               | 6                | 0              | 0.425609                | 3.052786  | -0.094166 |
| 13               | 8                | 0              | 0.203206                | 2.947950  | -1.325492 |
| 14               | 8                | 0              | 0.908553                | 4.048371  | 0.516103  |
| 15               | 1                | 0              | -0.649083               | 2.247140  | 1.573221  |
| 16               | 7                | 0              | -0.713994               | 0.768086  | 0.188026  |
| 17               | 1                | 0              | -0.980461               | 0.016542  | 0.908689  |
| 18               | 17               | 0              | -2.431191               | 1.264767  | -0.256471 |
| 19               | 8                | 0              | -4.810561               | -2.889864 | -0.274027 |
| 20               | 1                | 0              | -3.828944               | -3.022643 | -0.217846 |
| 21               | 1                | 0              | -5.151093               | -3.685381 | -0.716688 |
| 22               | 8                | 0              | -2.068788               | -3.145088 | -0.005262 |
| 23               | 1                | 0              | -1.949441               | -2.429870 | 0.670654  |
| 24               | 1                | 0              | -1.944709               | -3.976005 | 0.483387  |
| 25               | 8                | 0              | -5.207424               | -0.784651 | -2.094409 |
| 26               | 1                | 0              | -5.127539               | 0.019387  | -1.536314 |
| 27               | 1                | 0              | -5.055505               | -1.528000 | -1.463746 |
| 28               | 17               | 0              | 0.075018                | -0.104926 | -1.133316 |
| 29               | 1                | 0              | 0.857898                | 0.551984  | 2.348914  |
| 30               | 6                | 0              | 2.413316                | 0.710703  | 0.880771  |

|    |    |   |          |           |           |
|----|----|---|----------|-----------|-----------|
| 31 | 6  | 0 | 2.654157 | -0.664691 | 0.935587  |
| 32 | 6  | 0 | 3.260650 | 1.505765  | 0.094138  |
| 33 | 6  | 0 | 3.697619 | -1.226547 | 0.204460  |
| 34 | 1  | 0 | 2.016111 | -1.306664 | 1.535245  |
| 35 | 6  | 0 | 4.299132 | 0.941096  | -0.639949 |
| 36 | 1  | 0 | 3.109446 | 2.579499  | 0.050342  |
| 37 | 6  | 0 | 4.528234 | -0.437950 | -0.600271 |
| 38 | 8  | 0 | 5.564512 | -0.940011 | -1.347490 |
| 39 | 1  | 0 | 5.616459 | -1.908489 | -1.248262 |
| 40 | 17 | 0 | 3.978996 | -2.966408 | 0.282710  |
| 41 | 1  | 0 | 4.950134 | 1.558478  | -1.251589 |

---

## Standard orientation of TS-3,5,*N*-tri-Cl-Tyr-N

Cartesian coordinates of the transition states optimized at the B3LYP(D3BJ)/6-31+G(d) level:

Standard orientation of transition state of TS-3,5,*N*-tri-Cl-Tyr-N

State=1-A

Charge = -1 Multiplicity = 1

Lowest Harmonic Vibrational Frequency (LHVF) = -473.59 cm<sup>-1</sup>

Standard orientation:

| Center<br>Number | Atomic<br>Number | Atomic<br>Type | Coordinates (Angstroms) |           |           |
|------------------|------------------|----------------|-------------------------|-----------|-----------|
|                  |                  |                | X                       | Y         | Z         |
| 1                | 8                | 0              | 5.066336                | -1.253517 | -0.036355 |
| 2                | 1                | 0              | 5.435194                | -1.987285 | 0.484995  |
| 3                | 8                | 0              | 4.556107                | 0.676728  | 1.425182  |
| 4                | 1                | 0              | 4.804786                | 1.432954  | 0.863450  |
| 5                | 1                | 0              | 4.871332                | -0.394388 | 0.666491  |
| 6                | 8                | 0              | 2.011762                | 1.044074  | 1.509614  |
| 7                | 1                | 0              | 3.049735                | 0.868457  | 1.521991  |
| 8                | 1                | 0              | 1.727853                | 1.217085  | 2.422647  |
| 9                | 6                | 0              | -0.841157               | -1.329366 | 1.892411  |
| 10               | 1                | 0              | -1.328803               | -2.134718 | 2.447455  |
| 11               | 6                | 0              | 0.198014                | -2.029740 | 0.991796  |
| 12               | 6                | 0              | -0.305887               | -3.227776 | 0.139208  |
| 13               | 8                | 0              | 0.182471                | -3.384366 | -1.007968 |
| 14               | 8                | 0              | -1.125989               | -3.981495 | 0.732083  |
| 15               | 1                | 0              | 0.962077                | -2.443470 | 1.659053  |
| 16               | 7                | 0              | 0.973941                | -1.001889 | 0.209230  |
| 17               | 1                | 0              | 1.183990                | -0.136294 | 0.818239  |
| 18               | 17               | 0              | 2.726346                | -1.449001 | -0.121724 |
| 19               | 8                | 0              | 4.659914                | 2.834647  | -0.734754 |
| 20               | 1                | 0              | 3.675910                | 2.936058  | -0.660972 |
| 21               | 1                | 0              | 4.953572                | 3.582506  | -1.281856 |
| 22               | 8                | 0              | 1.916659                | 3.017367  | -0.386520 |
| 23               | 1                | 0              | 1.871535                | 2.351331  | 0.346432  |
| 24               | 1                | 0              | 1.780034                | 3.875935  | 0.047905  |
| 25               | 8                | 0              | 5.231780                | 0.513894  | -2.224918 |
| 26               | 1                | 0              | 5.254570                | -0.191409 | -1.542625 |
| 27               | 1                | 0              | 5.008228                | 1.329304  | -1.717262 |
| 28               | 17               | 0              | 0.176650                | -0.367203 | -1.241576 |
| 29               | 1                | 0              | -0.295523               | -0.716966 | 2.616321  |
| 30               | 6                | 0              | -1.864529               | -0.472636 | 1.186220  |

|    |    |   |           |           |           |
|----|----|---|-----------|-----------|-----------|
| 31 | 6  | 0 | -1.759451 | 0.919546  | 1.240542  |
| 32 | 6  | 0 | -2.897204 | -1.043917 | 0.433592  |
| 33 | 6  | 0 | -2.655290 | 1.715981  | 0.535134  |
| 34 | 1  | 0 | -0.964519 | 1.386017  | 1.813491  |
| 35 | 6  | 0 | -3.781077 | -0.234175 | -0.268495 |
| 36 | 1  | 0 | -3.004096 | -2.121523 | 0.379886  |
| 37 | 6  | 0 | -3.681196 | 1.165550  | -0.245260 |
| 38 | 8  | 0 | -4.575403 | 1.902526  | -0.961016 |
| 39 | 1  | 0 | -4.378673 | 2.853411  | -0.871922 |
| 40 | 17 | 0 | -5.063180 | -0.972110 | -1.213545 |
| 41 | 17 | 0 | -2.503770 | 3.468700  | 0.610257  |

---

## Standard orientation of TS-Tyr-Am-p-C3

Cartesian coordinates of the transition states optimized at the M06-2X(D3)/6-31+G(d) level:

Standard orientation of transition state of TS-Tyr-Am-p-C3

State=1-A

Charge = -1 Multiplicity = 1

Lowest Harmonic Vibrational Frequency (LHVF) = -346.72 cm<sup>-1</sup>

Standard orientation:

| Center<br>Number | Atomic<br>Number | Atomic<br>Type | Coordinates (Angstroms) |           |           |
|------------------|------------------|----------------|-------------------------|-----------|-----------|
|                  |                  |                | X                       | Y         | Z         |
| 1                | 1                | 0              | 0.627106                | 1.220552  | -1.407940 |
| 2                | 8                | 0              | 2.571359                | 0.601011  | 2.496185  |
| 3                | 1                | 0              | 2.052211                | 1.118320  | 3.136115  |
| 4                | 17               | 0              | 1.376776                | 0.491618  | 0.943502  |
| 5                | 8                | 0              | 3.216855                | 0.875676  | -2.492163 |
| 6                | 1                | 0              | 2.985559                | 1.655529  | -1.940717 |
| 7                | 1                | 0              | 2.559945                | 0.174449  | -2.256793 |
| 8                | 8                | 0              | 4.488219                | 1.862697  | 1.011418  |
| 9                | 1                | 0              | 3.835291                | 1.467613  | 1.637488  |
| 10               | 1                | 0              | 4.761728                | 1.109356  | 0.437628  |
| 11               | 8                | 0              | 2.843514                | 3.100066  | -0.817056 |
| 12               | 1                | 0              | 3.414501                | 2.706524  | -0.110720 |
| 13               | 1                | 0              | 1.937383                | 3.034532  | -0.475670 |
| 14               | 6                | 0              | 0.108854                | 0.422963  | -0.879467 |
| 15               | 6                | 0              | -0.387298               | -1.974292 | -0.734730 |
| 16               | 6                | 0              | -2.024894               | -0.321573 | 0.059737  |
| 17               | 6                | 0              | -1.584096               | -1.667679 | -0.141893 |
| 18               | 1                | 0              | -2.236572               | -2.475603 | 0.184970  |
| 19               | 1                | 0              | -1.485947               | 1.728386  | -0.198191 |
| 20               | 8                | 0              | 1.569302                | -1.200960 | -1.829634 |
| 21               | 6                | 0              | 0.483392                | -0.934691 | -1.205540 |
| 22               | 6                | 0              | -1.190299               | 0.689621  | -0.336187 |
| 23               | 8                | 0              | 2.657792                | -2.169692 | 2.601410  |
| 24               | 1                | 0              | 2.616702                | -1.191748 | 2.691055  |
| 25               | 1                | 0              | 2.874658                | -2.310667 | 1.656639  |
| 26               | 8                | 0              | 3.374015                | -2.358103 | -0.122511 |
| 27               | 1                | 0              | 3.676319                | -3.210396 | -0.474329 |
| 28               | 1                | 0              | 2.689506                | -2.034549 | -0.757401 |
| 29               | 8                | 0              | 5.086835                | -0.206625 | -0.751689 |
| 30               | 1                | 0              | 4.591554                | -0.996389 | -0.444868 |

|    |   |   |           |           |           |
|----|---|---|-----------|-----------|-----------|
| 31 | 1 | 0 | 4.508132  | 0.176901  | -1.452090 |
| 32 | 6 | 0 | -3.383036 | -0.043366 | 0.651306  |
| 33 | 1 | 0 | -3.698466 | -0.885080 | 1.281356  |
| 34 | 1 | 0 | -3.337019 | 0.846199  | 1.289178  |
| 35 | 6 | 0 | -4.463646 | 0.181999  | -0.422306 |
| 36 | 1 | 0 | -4.152806 | 1.015713  | -1.060973 |
| 37 | 7 | 0 | -4.614363 | -1.004923 | -1.252724 |
| 38 | 6 | 0 | -5.753346 | 0.569743  | 0.297921  |
| 39 | 8 | 0 | -6.498465 | -0.292465 | 0.789549  |
| 40 | 7 | 0 | -6.008919 | 1.881323  | 0.392776  |
| 41 | 1 | 0 | -6.815024 | 2.206434  | 0.915380  |
| 42 | 1 | 0 | -5.388584 | 2.568779  | -0.017400 |
| 43 | 1 | 0 | -4.901755 | -1.782266 | -0.656756 |
| 44 | 1 | 0 | -0.088706 | -3.006073 | -0.899935 |
| 45 | 1 | 0 | -5.377145 | -0.858018 | -1.913069 |

---

## Standard orientation of TS-N-Cl-Tyr-Am-p-C3

Cartesian coordinates of the transition states optimized at the M06-2X(D3)/6-31+G(d) level:

Standard orientation of transition state of TS-N-Cl-Tyr-Am-p-C3

State=1-A

Charge = -1 Multiplicity = 1

Lowest Harmonic Vibrational Frequency (LHVF) = -352.97 cm<sup>-1</sup>

Standard orientation:

| Center<br>Number | Atomic<br>Number | Atomic<br>Type | Coordinates (Angstroms) |           |           |
|------------------|------------------|----------------|-------------------------|-----------|-----------|
|                  |                  |                | X                       | Y         | Z         |
| 1                | 1                | 0              | 0.883635                | -0.239900 | -1.762543 |
| 2                | 8                | 0              | 3.080234                | 2.360488  | 1.038602  |
| 3                | 1                | 0              | 2.614026                | 3.214314  | 1.029480  |
| 4                | 17               | 0              | 1.773528                | 1.138850  | 0.210926  |
| 5                | 8                | 0              | 3.377327                | -1.504722 | -2.194034 |
| 6                | 1                | 0              | 3.198632                | -0.584030 | -2.488096 |
| 7                | 1                | 0              | 2.719277                | -1.693454 | -1.481124 |
| 8                | 8                | 0              | 4.889849                | 1.839146  | -0.933680 |
| 9                | 1                | 0              | 4.277459                | 2.135875  | -0.217662 |
| 10               | 1                | 0              | 5.119021                | 0.913394  | -0.685130 |
| 11               | 8                | 0              | 3.163888                | 1.180433  | -2.977100 |
| 12               | 1                | 0              | 3.755013                | 1.492516  | -2.247062 |
| 13               | 1                | 0              | 2.273636                | 1.473889  | -2.725892 |
| 14               | 6                | 0              | 0.383583                | -0.254526 | -0.796354 |
| 15               | 6                | 0              | -0.178924               | -1.544781 | 1.214990  |
| 16               | 6                | 0              | -1.699584               | 0.205152  | 0.399220  |
| 17               | 6                | 0              | -1.318480               | -0.796613 | 1.347395  |
| 18               | 1                | 0              | -1.974631               | -0.974911 | 2.198588  |
| 19               | 1                | 0              | -1.117433               | 1.192889  | -1.401721 |
| 20               | 8                | 0              | 1.713159                | -2.103432 | -0.100298 |
| 21               | 6                | 0              | 0.687574                | -1.362555 | 0.084240  |
| 22               | 6                | 0              | -0.863981               | 0.437689  | -0.659618 |
| 23               | 8                | 0              | 3.092619                | 0.777565  | 3.310068  |
| 24               | 1                | 0              | 3.084380                | 1.438255  | 2.581626  |
| 25               | 1                | 0              | 3.235081                | -0.075794 | 2.850990  |
| 26               | 8                | 0              | 3.615571                | -1.546735 | 1.796212  |
| 27               | 1                | 0              | 3.899517                | -2.357189 | 2.248102  |
| 28               | 1                | 0              | 2.898458                | -1.822605 | 1.175605  |
| 29               | 8                | 0              | 5.327509                | -0.845741 | -0.336929 |
| 30               | 1                | 0              | 4.835199                | -1.035490 | 0.490412  |



|    |    |   |           |           |           |
|----|----|---|-----------|-----------|-----------|
| 31 | 1  | 0 | 4.714542  | -1.147617 | -1.048073 |
| 32 | 6  | 0 | -3.007505 | 0.938274  | 0.555675  |
| 33 | 1  | 0 | -3.314068 | 0.936259  | 1.608781  |
| 34 | 1  | 0 | -2.889954 | 1.984762  | 0.250100  |
| 35 | 6  | 0 | -4.161698 | 0.344535  | -0.272403 |
| 36 | 1  | 0 | -3.912720 | 0.361404  | -1.336299 |
| 37 | 7  | 0 | -4.558599 | -1.034919 | 0.076011  |
| 38 | 6  | 0 | -5.401702 | 1.194718  | -0.018705 |
| 39 | 8  | 0 | -5.978132 | 1.152345  | 1.077316  |
| 40 | 17 | 0 | -3.570520 | -2.223503 | -0.752205 |
| 41 | 7  | 0 | -5.791375 | 1.990532  | -1.019591 |
| 42 | 1  | 0 | -6.585403 | 2.609171  | -0.891981 |
| 43 | 1  | 0 | -5.312692 | 1.992484  | -1.912224 |
| 44 | 1  | 0 | -4.367439 | -1.190528 | 1.069475  |
| 45 | 1  | 0 | 0.073260  | -2.320019 | 1.933558  |

---

## Standard orientation of TS-5-Cl-Tyr-Am-p-C3

Cartesian coordinates of the transition states optimized at the M06-2X(D3)/6-31+G(d) level:

Standard orientation of transition state of TS-5-Cl-Tyr-Am-p-C3

State=1-A

Charge = -1 Multiplicity = 1

Lowest Harmonic Vibrational Frequency (LHVF) = -354.66 cm<sup>-1</sup>

Standard orientation:

| Center<br>Number | Atomic<br>Number | Atomic<br>Type | Coordinates (Angstroms) |           |           |
|------------------|------------------|----------------|-------------------------|-----------|-----------|
|                  |                  |                | X                       | Y         | Z         |
| 1                | 1                | 0              | -0.644547               | -1.258676 | -1.579281 |
| 2                | 8                | 0              | -2.571229               | -1.257045 | 2.416381  |
| 3                | 1                | 0              | -2.043578               | -1.856755 | 2.970946  |
| 4                | 17               | 0              | -1.366102               | -0.927943 | 0.859996  |
| 5                | 8                | 0              | -3.228914               | -0.776106 | -2.579886 |
| 6                | 1                | 0              | -2.971483               | -1.626973 | -2.159284 |
| 7                | 1                | 0              | -2.586535               | -0.109098 | -2.244121 |
| 8                | 8                | 0              | -4.429031               | -2.353855 | 0.758126  |
| 9                | 1                | 0              | -3.786124               | -2.026476 | 1.434663  |
| 10               | 1                | 0              | -4.740644               | -1.536127 | 0.305230  |
| 11               | 8                | 0              | -2.785941               | -3.216728 | -1.273459 |
| 12               | 1                | 0              | -3.346733               | -2.957607 | -0.499685 |
| 13               | 1                | 0              | -1.874466               | -3.206323 | -0.940474 |
| 14               | 6                | 0              | -0.125448               | -0.582583 | -0.903358 |
| 15               | 6                | 0              | 0.403347                | 1.732399  | -0.338295 |
| 16               | 6                | 0              | 2.024243                | -0.039246 | 0.127441  |
| 17               | 6                | 0              | 1.598127                | 1.326105  | 0.183585  |
| 18               | 1                | 0              | 2.249719                | 2.058437  | 0.655412  |
| 19               | 1                | 0              | 1.462023                | -2.004102 | -0.484910 |
| 20               | 8                | 0              | -1.557432               | 1.196571  | -1.575187 |
| 21               | 6                | 0              | -0.492009               | 0.816863  | -1.007242 |
| 22               | 6                | 0              | 1.178875                | -0.954772 | -0.433813 |
| 23               | 8                | 0              | -2.555127               | 1.474551  | 2.886078  |
| 24               | 1                | 0              | -2.538190               | 0.491743  | 2.843392  |
| 25               | 1                | 0              | -2.838276               | 1.741339  | 1.987061  |
| 26               | 8                | 0              | -3.463032               | 2.010513  | 0.266229  |
| 27               | 1                | 0              | -3.786013               | 2.907489  | 0.083919  |
| 28               | 1                | 0              | -2.755914               | 1.842519  | -0.397725 |
| 29               | 8                | 0              | -5.121820               | -0.065101 | -0.673942 |
| 30               | 1                | 0              | -4.642510               | 0.682332  | -0.256437 |

|    |    |   |           |           |           |
|----|----|---|-----------|-----------|-----------|
| 31 | 1  | 0 | -4.545606 | -0.315304 | -1.433260 |
| 32 | 6  | 0 | 3.382929  | -0.424617 | 0.652191  |
| 33 | 1  | 0 | 3.678921  | 0.251540  | 1.464431  |
| 34 | 1  | 0 | 3.343078  | -1.438723 | 1.063581  |
| 35 | 6  | 0 | 4.473744  | -0.377480 | -0.433931 |
| 36 | 1  | 0 | 4.184670  | -1.049850 | -1.249127 |
| 37 | 7  | 0 | 4.602792  | 0.969871  | -0.970035 |
| 38 | 6  | 0 | 5.767274  | -0.893250 | 0.196319  |
| 39 | 8  | 0 | 6.509153  | -0.139538 | 0.845150  |
| 40 | 7  | 0 | 6.028309  | -2.197210 | 0.035203  |
| 41 | 1  | 0 | 6.834325  | -2.614591 | 0.487939  |
| 42 | 1  | 0 | 5.405621  | -2.797010 | -0.492528 |
| 43 | 1  | 0 | 4.880476  | 1.594477  | -0.211813 |
| 44 | 1  | 0 | 5.365582  | 0.989886  | -1.646126 |
| 45 | 17 | 0 | -0.066899 | 3.411626  | -0.270070 |

---

## Standard orientation of TS-*N,N*-di-Cl-Tyr-Am-p-C3

Cartesian coordinates of the transition states optimized at the M06-2X(D3)/6-31+G(d) level:

Standard orientation of transition state of TS-*N,N*-di-Cl-Tyr-Am-p-C3

State=1-A

Charge = -1 Multiplicity = 1

Lowest Harmonic Vibrational Frequency (LHVF) = -355.84 cm<sup>-1</sup>

Standard orientation:

| Center<br>Number | Atomic<br>Number | Atomic<br>Type | Coordinates (Angstroms) |           |           |
|------------------|------------------|----------------|-------------------------|-----------|-----------|
|                  |                  |                | X                       | Y         | Z         |
| 1                | 1                | 0              | 1.210754                | 0.352514  | -1.705730 |
| 2                | 8                | 0              | 3.481168                | 1.858574  | 1.761496  |
| 3                | 1                | 0              | 3.035012                | 2.673924  | 2.048263  |
| 4                | 17               | 0              | 2.130233                | 1.004697  | 0.595310  |
| 5                | 8                | 0              | 3.642333                | -0.748608 | -2.555802 |
| 6                | 1                | 0              | 3.477583                | 0.220232  | -2.530310 |
| 7                | 1                | 0              | 2.994472                | -1.149832 | -1.926982 |
| 8                | 8                | 0              | 5.247160                | 1.967847  | -0.309945 |
| 9                | 1                | 0              | 4.653276                | 2.023718  | 0.477928  |
| 10               | 1                | 0              | 5.463616                | 1.009302  | -0.383208 |
| 11               | 8                | 0              | 3.485591                | 2.052049  | -2.422529 |
| 12               | 1                | 0              | 4.093029                | 2.091017  | -1.641713 |
| 13               | 1                | 0              | 2.608099                | 2.274147  | -2.072663 |
| 14               | 6                | 0              | 0.710782                | 0.046839  | -0.789107 |
| 15               | 6                | 0              | 0.105409                | -1.802367 | 0.708440  |
| 16               | 6                | 0              | -1.371133               | 0.148902  | 0.489197  |
| 17               | 6                | 0              | -1.016523               | -1.107182 | 1.075017  |
| 18               | 1                | 0              | -1.672739               | -1.526703 | 1.835125  |
| 19               | 1                | 0              | -0.752204               | 1.645684  | -0.902576 |
| 20               | 8                | 0              | 1.980867                | -1.965342 | -0.734497 |
| 21               | 6                | 0              | 0.978958                | -1.295148 | -0.312875 |
| 22               | 6                | 0              | -0.520381               | 0.689314  | -0.436118 |
| 23               | 8                | 0              | 3.513357                | -0.402428 | 3.356938  |
| 24               | 1                | 0              | 3.499492                | 0.463892  | 2.891370  |
| 25               | 1                | 0              | 3.634164                | -1.055416 | 2.636992  |
| 26               | 8                | 0              | 3.967380                | -2.113804 | 1.158212  |
| 27               | 1                | 0              | 4.210383                | -3.039445 | 1.318857  |
| 28               | 1                | 0              | 3.216661                | -2.142788 | 0.517958  |
| 29               | 8                | 0              | 5.658353                | -0.766981 | -0.655207 |
| 30               | 1                | 0              | 5.183668                | -1.224993 | 0.071144  |

|    |    |   |           |           |           |
|----|----|---|-----------|-----------|-----------|
| 31 | 1  | 0 | 5.023017  | -0.806425 | -1.408548 |
| 32 | 6  | 0 | -2.665163 | 0.835002  | 0.855842  |
| 33 | 1  | 0 | -3.071617 | 0.427210  | 1.786932  |
| 34 | 1  | 0 | -2.477167 | 1.899737  | 1.031403  |
| 35 | 6  | 0 | -3.743777 | 0.774361  | -0.243401 |
| 36 | 1  | 0 | -3.342096 | 1.209853  | -1.163493 |
| 37 | 7  | 0 | -4.260466 | -0.555365 | -0.669900 |
| 38 | 6  | 0 | -4.958312 | 1.604921  | 0.183394  |
| 39 | 8  | 0 | -5.971165 | 1.096559  | 0.671209  |
| 40 | 17 | 0 | -3.140407 | -1.316495 | -1.793967 |
| 41 | 17 | 0 | -4.488644 | -1.642880 | 0.687173  |
| 42 | 1  | 0 | 0.337758  | -2.768186 | 1.148881  |
| 43 | 7  | 0 | -4.810169 | 2.924809  | 0.011629  |
| 44 | 1  | 0 | -5.537365 | 3.554592  | 0.332879  |
| 45 | 1  | 0 | -3.972948 | 3.320586  | -0.400725 |

---

## Standard orientation of TS-5,*N*-di-Cl-Tyr-Am-p-C3

Cartesian coordinates of the transition states optimized at the M06-2X(D3)/6-31+G(d) level:

Standard orientation of transition state of TS-5,*N*-di-Cl-Tyr-Am-p-C3

State=1-A

Charge = -1 Multiplicity = 1

Lowest Harmonic Vibrational Frequency (LHVF) = -362.61 cm<sup>-1</sup>

Standard orientation:

| Center<br>Number | Atomic<br>Number | Atomic<br>Type | Coordinates (Angstroms) |           |           |
|------------------|------------------|----------------|-------------------------|-----------|-----------|
|                  |                  |                | X                       | Y         | Z         |
| 1                | 1                | 0              | -0.866117               | -1.095866 | -1.645458 |
| 2                | 8                | 0              | -3.074491               | -1.640205 | 2.165934  |
| 3                | 1                | 0              | -2.627744               | -2.366937 | 2.632518  |
| 4                | 17               | 0              | -1.739020               | -1.130044 | 0.762667  |
| 5                | 8                | 0              | -3.371950               | -0.306015 | -2.715553 |
| 6                | 1                | 0              | -3.208146               | -1.226121 | -2.409220 |
| 7                | 1                | 0              | -2.717831               | 0.253190  | -2.237564 |
| 8                | 8                | 0              | -4.919654               | -2.254522 | 0.269402  |
| 9                | 1                | 0              | -4.290426               | -2.095153 | 1.016499  |
| 10               | 1                | 0              | -5.137664               | -1.354831 | -0.067780 |
| 11               | 8                | 0              | -3.192633               | -2.934598 | -1.759667 |
| 12               | 1                | 0              | -3.804595               | -2.750123 | -1.003307 |
| 13               | 1                | 0              | -2.315366               | -3.022028 | -1.353821 |
| 14               | 6                | 0              | -0.371220               | -0.568183 | -0.832613 |
| 15               | 6                | 0              | 0.205185                | 1.594166  | 0.147609  |
| 16               | 6                | 0              | 1.727547                | -0.304138 | 0.390623  |
| 17               | 6                | 0              | 1.345814                | 1.048956  | 0.660437  |
| 18               | 1                | 0              | 1.995516                | 1.662199  | 1.282681  |
| 19               | 1                | 0              | 1.136996                | -2.111105 | -0.578492 |
| 20               | 8                | 0              | -1.679680               | 1.368996  | -1.285958 |
| 21               | 6                | 0              | -0.674540               | 0.848041  | -0.724099 |
| 22               | 6                | 0              | 0.886575                | -1.074992 | -0.360750 |
| 23               | 8                | 0              | -3.004563               | 0.970980  | 3.076707  |
| 24               | 1                | 0              | -3.016785               | 0.009893  | 2.865185  |
| 25               | 1                | 0              | -3.193718               | 1.404582  | 2.219056  |
| 26               | 8                | 0              | -3.659417               | 2.031233  | 0.538927  |
| 27               | 1                | 0              | -3.899146               | 2.971324  | 0.510037  |
| 28               | 1                | 0              | -2.916504               | 1.926198  | -0.098134 |
| 29               | 8                | 0              | -5.355258               | 0.261226  | -0.849086 |
| 30               | 1                | 0              | -4.871343               | 0.902788  | -0.286291 |

|    |    |   |           |           |           |
|----|----|---|-----------|-----------|-----------|
| 31 | 1  | 0 | -4.734874 | 0.087876  | -1.594518 |
| 32 | 6  | 0 | 3.049239  | -0.817016 | 0.901568  |
| 33 | 1  | 0 | 3.326665  | -0.285763 | 1.820090  |
| 34 | 1  | 0 | 2.964164  | -1.881735 | 1.147679  |
| 35 | 6  | 0 | 4.207329  | -0.664534 | -0.101968 |
| 36 | 1  | 0 | 3.988515  | -1.219154 | -1.017879 |
| 37 | 7  | 0 | 4.550930  | 0.719715  | -0.485351 |
| 38 | 6  | 0 | 5.465938  | -1.223951 | 0.553283  |
| 39 | 8  | 0 | 6.006433  | -0.619410 | 1.489831  |
| 40 | 17 | 0 | 3.551036  | 1.293883  | -1.805789 |
| 41 | 7  | 0 | 5.911414  | -2.392695 | 0.081567  |
| 42 | 1  | 0 | 6.722281  | -2.831678 | 0.505286  |
| 43 | 1  | 0 | 5.461733  | -2.853827 | -0.700183 |
| 44 | 17 | 0 | -0.200584 | 3.259156  | 0.471108  |
| 45 | 1  | 0 | 4.332158  | 1.344646  | 0.295500  |

---

## Standard orientation of TS-5,N,N-tri-Cl-Tyr-Am-p-C3

Cartesian coordinates of the transition states optimized at the M06-2X(D3)/6-31+G(d) level:

Standard orientation of transition state of TS-5,N,N-tri-Cl-Tyr-Am-p-C3

State=1-A

Charge = -1 Multiplicity = 1

Lowest Harmonic Vibrational Frequency (LHVF) = -368.69 cm<sup>-1</sup>

Standard orientation:

| Center<br>Number | Atomic<br>Number | Atomic<br>Type | Coordinates (Angstroms) |           |           |
|------------------|------------------|----------------|-------------------------|-----------|-----------|
|                  |                  |                | X                       | Y         | Z         |
| 1                | 1                | 0              | 1.126050                | -1.126415 | 1.567817  |
| 2                | 8                | 0              | 3.432729                | -1.566809 | -2.199482 |
| 3                | 1                | 0              | 2.997135                | -2.277837 | -2.699345 |
| 4                | 17               | 0              | 2.054284                | -1.095529 | -0.812074 |
| 5                | 8                | 0              | 3.622367                | -0.337275 | 2.724805  |
| 6                | 1                | 0              | 3.474804                | -1.253797 | 2.399540  |
| 7                | 1                | 0              | 2.969579                | 0.221909  | 2.245419  |
| 8                | 8                | 0              | 5.235039                | -2.215724 | -0.278056 |
| 9                | 1                | 0              | 4.619620                | -2.043646 | -1.034337 |
| 10               | 1                | 0              | 5.442018                | -1.322296 | 0.081904  |
| 11               | 8                | 0              | 3.478914                | -2.939662 | 1.706870  |
| 12               | 1                | 0              | 4.101455                | -2.737452 | 0.963539  |
| 13               | 1                | 0              | 2.607218                | -3.015119 | 1.287062  |
| 14               | 6                | 0              | 0.653148                | -0.577960 | 0.755571  |
| 15               | 6                | 0              | 0.085083                | 1.614152  | -0.165154 |
| 16               | 6                | 0              | -1.424637               | -0.279512 | -0.495896 |
| 17               | 6                | 0              | -1.043413               | 1.081635  | -0.718115 |
| 18               | 1                | 0              | -1.673884               | 1.709568  | -1.343233 |
| 19               | 1                | 0              | -0.842305               | -2.116604 | 0.421285  |
| 20               | 8                | 0              | 1.938035                | 1.351105  | 1.301068  |
| 21               | 6                | 0              | 0.949172                | 0.844544  | 0.701579  |
| 22               | 6                | 0              | -0.591685               | -1.073231 | 0.239705  |
| 23               | 8                | 0              | 3.393682                | 1.064003  | -3.042624 |
| 24               | 1                | 0              | 3.397908                | 0.098613  | -2.849189 |
| 25               | 1                | 0              | 3.556122                | 1.481688  | -2.171909 |
| 26               | 8                | 0              | 3.956147                | 2.077197  | -0.463686 |
| 27               | 1                | 0              | 4.190118                | 3.016997  | -0.399335 |
| 28               | 1                | 0              | 3.201097                | 1.948824  | 0.153787  |
| 29               | 8                | 0              | 5.635075                | 0.277282  | 0.904222  |
| 30               | 1                | 0              | 5.159029                | 0.930805  | 0.348568  |



|    |    |   |           |           |           |
|----|----|---|-----------|-----------|-----------|
| 31 | 1  | 0 | 5.001945  | 0.084932  | 1.634117  |
| 32 | 6  | 0 | -2.735878 | -0.794556 | -1.038802 |
| 33 | 1  | 0 | -3.121753 | -0.126170 | -1.815149 |
| 34 | 1  | 0 | -2.578400 | -1.771570 | -1.507995 |
| 35 | 6  | 0 | -3.818704 | -1.012630 | 0.035600  |
| 36 | 1  | 0 | -3.453745 | -1.735559 | 0.771793  |
| 37 | 7  | 0 | -4.261638 | 0.147749  | 0.857151  |
| 38 | 6  | 0 | -5.075213 | -1.590764 | -0.624526 |
| 39 | 8  | 0 | -6.034671 | -0.885840 | -0.948311 |
| 40 | 17 | 0 | -3.120340 | 0.446930  | 2.163385  |
| 41 | 17 | 0 | -4.397548 | 1.617424  | -0.088926 |
| 42 | 7  | 0 | -5.024028 | -2.909291 | -0.850111 |
| 43 | 1  | 0 | -5.786380 | -3.361124 | -1.343706 |
| 44 | 1  | 0 | -4.230653 | -3.471070 | -0.563918 |
| 45 | 17 | 0 | 0.498717  | 3.285989  | -0.437338 |

---

## Standard orientation of TS-Tyr-Am-p-C5

Cartesian coordinates of the transition states optimized at the M06-2X(D3)/6-31+G(d) level:

Standard orientation of transition state of TS-Tyr-Am-p-C5

State=1-A

Charge = -1 Multiplicity = 1

Lowest Harmonic Vibrational Frequency (LHVF) = -341.10 cm<sup>-1</sup>

Standard orientation:

| Center<br>Number | Atomic<br>Number | Atomic<br>Type | Coordinates (Angstroms) |           |           |
|------------------|------------------|----------------|-------------------------|-----------|-----------|
|                  |                  |                | X                       | Y         | Z         |
| 1                | 1                | 0              | 1.086103                | -0.412669 | -2.163255 |
| 2                | 8                | 0              | 1.611928                | 2.163345  | 1.393270  |
| 3                | 1                | 0              | 0.941545                | 2.864486  | 1.316669  |
| 4                | 17               | 0              | 0.988812                | 0.817761  | 0.109907  |
| 5                | 8                | 0              | 3.840325                | -0.928080 | -1.925759 |
| 6                | 1                | 0              | 3.491829                | -0.042348 | -2.171139 |
| 7                | 1                | 0              | 3.100881                | -1.388428 | -1.458253 |
| 8                | 8                | 0              | 3.976283                | 2.417058  | 0.048000  |
| 9                | 1                | 0              | 3.137586                | 2.436583  | 0.568246  |
| 10               | 1                | 0              | 4.377214                | 1.543374  | 0.265008  |
| 11               | 8                | 0              | 3.085246                | 1.723555  | -2.465109 |
| 12               | 1                | 0              | 3.368197                | 2.036198  | -1.569780 |
| 13               | 1                | 0              | 2.115033                | 1.732999  | -2.439693 |
| 14               | 6                | 0              | 0.368878                | -0.697109 | -1.396262 |
| 15               | 6                | 0              | -0.329705               | -2.364193 | 0.261042  |
| 16               | 6                | 0              | -1.998659               | -0.922485 | -0.826364 |
| 17               | 6                | 0              | -1.621996               | -1.935366 | 0.113084  |
| 18               | 1                | 0              | -0.075840               | -3.159751 | 0.956531  |
| 19               | 1                | 0              | -2.403240               | -2.390473 | 0.720861  |
| 20               | 1                | 0              | -1.255526               | 0.418073  | -2.310176 |
| 21               | 8                | 0              | 1.922120                | -2.251568 | -0.477659 |
| 22               | 6                | 0              | 0.721614                | -1.812131 | -0.547810 |
| 23               | 6                | 0              | -1.010574               | -0.353897 | -1.583277 |
| 24               | 8                | 0              | 1.480120                | 0.265965  | 3.410531  |
| 25               | 1                | 0              | 1.472452                | 1.020456  | 2.780494  |
| 26               | 1                | 0              | 1.981114                | -0.430568 | 2.937656  |
| 27               | 8                | 0              | 3.031904                | -1.570456 | 1.934699  |
| 28               | 1                | 0              | 3.393561                | -2.352415 | 2.381228  |
| 29               | 1                | 0              | 2.605146                | -1.906381 | 1.109367  |
| 30               | 8                | 0              | 4.983272                | -0.144843 | 0.477869  |

|    |   |   |           |           |           |
|----|---|---|-----------|-----------|-----------|
| 31 | 1 | 0 | 4.364278  | -0.586936 | 1.097908  |
| 32 | 1 | 0 | 4.687689  | -0.457699 | -0.409269 |
| 33 | 6 | 0 | -3.443474 | -0.514431 | -0.938130 |
| 34 | 1 | 0 | -3.599873 | 0.069530  | -1.853564 |
| 35 | 1 | 0 | -4.076900 | -1.407601 | -1.004473 |
| 36 | 6 | 0 | -3.916577 | 0.331750  | 0.259404  |
| 37 | 1 | 0 | -3.678795 | -0.199636 | 1.187253  |
| 38 | 7 | 0 | -3.231452 | 1.617138  | 0.276870  |
| 39 | 1 | 0 | -3.498290 | 2.134899  | -0.561391 |
| 40 | 1 | 0 | -3.569611 | 2.165756  | 1.066864  |
| 41 | 6 | 0 | -5.433002 | 0.473254  | 0.150011  |
| 42 | 8 | 0 | -5.944504 | 1.316019  | -0.604131 |
| 43 | 7 | 0 | -6.165705 | -0.376725 | 0.881395  |
| 44 | 1 | 0 | -7.176621 | -0.376010 | 0.799946  |
| 45 | 1 | 0 | -5.730202 | -1.056592 | 1.492808  |

---

## Standard orientation of TS-N-Cl-Tyr-Am-p-C5

Cartesian coordinates of the transition states optimized at the M06-2X(D3)/6-31+G(d) level:

Standard orientation of transition state of TS-N-Cl-Tyr-Am-p-C5

State=1-A

Charge = -1 Multiplicity = 1

Lowest Harmonic Vibrational Frequency (LHVF) = -342.44 cm<sup>-1</sup>

Standard orientation:

| Center<br>Number | Atomic<br>Number | Atomic<br>Type | Coordinates (Angstroms) |           |           |
|------------------|------------------|----------------|-------------------------|-----------|-----------|
|                  |                  |                | X                       | Y         | Z         |
| 1                | 1                | 0              | 1.346722                | -1.361235 | -1.853245 |
| 2                | 8                | 0              | 1.904680                | 2.440430  | 0.338101  |
| 3                | 1                | 0              | 1.281199                | 3.061924  | -0.077160 |
| 4                | 17               | 0              | 1.270477                | 0.700862  | -0.292213 |
| 5                | 8                | 0              | 4.110461                | -1.772573 | -1.301836 |
| 6                | 1                | 0              | 3.807659                | -1.055191 | -1.901421 |
| 7                | 1                | 0              | 3.336355                | -1.984954 | -0.723204 |
| 8                | 8                | 0              | 4.327507                | 2.074768  | -0.873928 |
| 9                | 1                | 0              | 3.469107                | 2.323375  | -0.454774 |
| 10               | 1                | 0              | 4.678755                | 1.358391  | -0.294838 |
| 11               | 8                | 0              | 3.477774                | 0.437017  | -2.920141 |
| 12               | 1                | 0              | 3.756034                | 1.079727  | -2.220766 |
| 13               | 1                | 0              | 2.508032                | 0.477187  | -2.924184 |
| 14               | 6                | 0              | 0.611782                | -1.291624 | -1.053602 |
| 15               | 6                | 0              | -0.155667               | -2.120901 | 1.121278  |
| 16               | 6                | 0              | -1.769433               | -1.219857 | -0.497479 |
| 17               | 6                | 0              | -1.435652               | -1.775634 | 0.777692  |
| 18               | 1                | 0              | -2.236102               | -1.943048 | 1.497477  |
| 19               | 1                | 0              | -0.967283               | -0.604508 | -2.376170 |
| 20               | 8                | 0              | 2.112517                | -2.345801 | 0.469384  |
| 21               | 6                | 0              | 0.923153                | -1.960703 | 0.186868  |
| 22               | 6                | 0              | -0.754706               | -1.022810 | -1.394235 |
| 23               | 8                | 0              | 1.481507                | 1.552052  | 2.941978  |
| 24               | 1                | 0              | 1.568764                | 1.990657  | 2.067372  |
| 25               | 1                | 0              | 1.989312                | 0.720869  | 2.834840  |
| 26               | 8                | 0              | 3.090967                | -0.715056 | 2.444700  |
| 27               | 1                | 0              | 3.400927                | -1.242361 | 3.198114  |
| 28               | 1                | 0              | 2.708850                | -1.363445 | 1.804124  |
| 29               | 8                | 0              | 5.175001                | -0.100823 | 0.638298  |
| 30               | 1                | 0              | 4.504585                | -0.221113 | 1.344599  |

|    |    |   |           |           |           |
|----|----|---|-----------|-----------|-----------|
| 31 | 1  | 0 | 4.904036  | -0.745905 | -0.056528 |
| 32 | 6  | 0 | -3.211948 | -0.922889 | -0.827525 |
| 33 | 1  | 0 | -3.298106 | -0.565287 | -1.860627 |
| 34 | 1  | 0 | -3.784582 | -1.858577 | -0.763923 |
| 35 | 6  | 0 | -3.910036 | 0.096606  | 0.096461  |
| 36 | 1  | 0 | -3.667573 | -0.100538 | 1.144122  |
| 37 | 7  | 0 | -3.639760 | 1.520795  | -0.160389 |
| 38 | 6  | 0 | -5.413324 | -0.042988 | -0.112916 |
| 39 | 8  | 0 | -5.940455 | 0.369076  | -1.155823 |
| 40 | 17 | 0 | -1.978170 | 1.928115  | 0.227487  |
| 41 | 1  | 0 | 0.066617  | -2.568329 | 2.086478  |
| 42 | 1  | 0 | -3.708809 | 1.675251  | -1.170002 |
| 43 | 7  | 0 | -6.093699 | -0.652657 | 0.862200  |
| 44 | 1  | 0 | -7.088201 | -0.822249 | 0.753449  |
| 45 | 1  | 0 | -5.635987 | -0.968128 | 1.708825  |

---

## Standard orientation of TS-3-Cl-Tyr-Am-p-C5

Cartesian coordinates of the transition states optimized at the M06-2X(D3)/6-31+G(d) level:

Standard orientation of transition state of TS-3-Cl-Tyr-Am-p-C5

State=1-A

Charge = -1 Multiplicity = 1

Lowest Harmonic Vibrational Frequency (LHVF) = -354.83 cm<sup>-1</sup>

Standard orientation:

| Center<br>Number | Atomic<br>Number | Atomic<br>Type | Coordinates (Angstroms) |           |           |
|------------------|------------------|----------------|-------------------------|-----------|-----------|
|                  |                  |                | X                       | Y         | Z         |
| 1                | 1                | 0              | -1.092736               | -0.641809 | -2.178275 |
| 2                | 8                | 0              | -1.616719               | -1.835796 | 2.069356  |
| 3                | 1                | 0              | -0.934505               | -2.505704 | 2.247540  |
| 4                | 17               | 0              | -0.984550               | -1.017510 | 0.362432  |
| 5                | 8                | 0              | -3.846581               | -0.122428 | -2.135391 |
| 6                | 1                | 0              | -3.476613               | -1.031354 | -2.068688 |
| 7                | 1                | 0              | -3.122355               | 0.481690  | -1.851976 |
| 8                | 8                | 0              | -3.915323               | -2.619886 | 0.841471  |
| 9                | 1                | 0              | -3.085842               | -2.429310 | 1.344929  |
| 10               | 1                | 0              | -4.350946               | -1.740701 | 0.751107  |
| 11               | 8                | 0              | -3.047165               | -2.781144 | -1.765970 |
| 12               | 1                | 0              | -3.303465               | -2.781703 | -0.809712 |
| 13               | 1                | 0              | -2.076905               | -2.800900 | -1.770934 |
| 14               | 6                | 0              | -0.373707               | -0.134279 | -1.538814 |
| 15               | 6                | 0              | 0.343750                | 1.974493  | -0.540403 |
| 16               | 6                | 0              | 1.997673                | 0.261141  | -1.102178 |
| 17               | 6                | 0              | 1.633564                | 1.528228  | -0.543067 |
| 18               | 1                | 0              | 2.413345                | 2.156446  | -0.115972 |
| 19               | 1                | 0              | 1.242054                | -1.496348 | -2.044130 |
| 20               | 8                | 0              | -1.916629               | 1.649110  | -1.212784 |
| 21               | 6                | 0              | -0.732966               | 1.209250  | -1.128900 |
| 22               | 6                | 0              | 1.006004                | -0.524475 | -1.616702 |
| 23               | 8                | 0              | -1.402871               | 0.666496  | 3.236077  |
| 24               | 1                | 0              | -1.417633               | -0.266038 | 2.922101  |
| 25               | 1                | 0              | -1.953971               | 1.140581  | 2.579731  |
| 26               | 8                | 0              | -3.116501               | 1.785723  | 1.284472  |
| 27               | 1                | 0              | -3.479747               | 2.669200  | 1.456980  |
| 28               | 1                | 0              | -2.670021               | 1.849824  | 0.409446  |
| 29               | 8                | 0              | -5.014493               | -0.098865 | 0.380195  |
| 30               | 1                | 0              | -4.421792               | 0.545505  | 0.822648  |

|    |    |   |           |           |           |
|----|----|---|-----------|-----------|-----------|
| 31 | 1  | 0 | -4.711211 | -0.087336 | -0.557788 |
| 32 | 6  | 0 | 3.443126  | -0.157606 | -1.075603 |
| 33 | 1  | 0 | 3.590280  | -1.028766 | -1.725266 |
| 34 | 1  | 0 | 4.071157  | 0.654138  | -1.462621 |
| 35 | 6  | 0 | 3.927292  | -0.520637 | 0.340822  |
| 36 | 1  | 0 | 3.701516  | 0.309182  | 1.019126  |
| 37 | 7  | 0 | 3.238651  | -1.709605 | 0.825116  |
| 38 | 1  | 0 | 3.499509  | -2.497061 | 0.230316  |
| 39 | 1  | 0 | 3.579682  | -1.935572 | 1.758977  |
| 40 | 6  | 0 | 5.441950  | -0.703143 | 0.271713  |
| 41 | 8  | 0 | 5.938614  | -1.755489 | -0.159679 |
| 42 | 7  | 0 | 6.187380  | 0.337360  | 0.665605  |
| 43 | 1  | 0 | 7.197823  | 0.297060  | 0.587895  |
| 44 | 1  | 0 | 5.762335  | 1.182756  | 1.026965  |
| 45 | 17 | 0 | -0.048446 | 3.538824  | 0.125177  |

---

## Standard orientation of TS-*N,N*-di-Cl-Tyr-Am-p-C5

Cartesian coordinates of the transition states optimized at the M06-2X(D3)/6-31+G(d) level:

Standard orientation of transition state of TS-*N,N*-di-Cl-Tyr-Am-p-C5

State=1-A

Charge = -1 Multiplicity = 1

Lowest Harmonic Vibrational Frequency (LHVF) = -338.84 cm<sup>-1</sup>

Standard orientation:

| Center<br>Number | Atomic<br>Number | Atomic<br>Type | Coordinates (Angstroms) |           |           |
|------------------|------------------|----------------|-------------------------|-----------|-----------|
|                  |                  |                | X                       | Y         | Z         |
| 1                | 1                | 0              | -1.575853               | 1.292271  | -2.001814 |
| 2                | 8                | 0              | -1.741097               | -2.353018 | 0.536721  |
| 3                | 1                | 0              | -1.006659               | -2.903676 | 0.212974  |
| 4                | 17               | 0              | -1.332802               | -0.612089 | -0.257650 |
| 5                | 8                | 0              | -4.413832               | 1.363437  | -1.525181 |
| 6                | 1                | 0              | -4.014538               | 0.633856  | -2.049018 |
| 7                | 1                | 0              | -3.681699               | 1.734980  | -0.974434 |
| 8                | 8                | 0              | -4.169073               | -2.425910 | -0.712989 |
| 9                | 1                | 0              | -3.291232               | -2.529011 | -0.273739 |
| 10               | 1                | 0              | -4.607328               | -1.704281 | -0.204317 |
| 11               | 8                | 0              | -3.474114               | -0.900902 | -2.900525 |
| 12               | 1                | 0              | -3.699234               | -1.501728 | -2.146924 |
| 13               | 1                | 0              | -2.507824               | -0.813891 | -2.868161 |
| 14               | 6                | 0              | -0.877488               | 1.364924  | -1.170645 |
| 15               | 6                | 0              | -0.294112               | 2.466501  | 0.942762  |
| 16               | 6                | 0              | 1.468487                | 1.560324  | -0.506855 |
| 17               | 6                | 0              | 1.025874                | 2.207181  | 0.690315  |
| 18               | 1                | 0              | 1.773867                | 2.508531  | 1.423143  |
| 19               | 1                | 0              | 0.821050                | 0.708585  | -2.352399 |
| 20               | 8                | 0              | -2.541373               | 2.387392  | 0.192570  |
| 21               | 6                | 0              | -1.308141               | 2.109330  | -0.010883 |
| 22               | 6                | 0              | 0.522901                | 1.193513  | -1.425107 |
| 23               | 8                | 0              | -1.420388               | -1.142070 | 3.032278  |
| 24               | 1                | 0              | -1.437393               | -1.668666 | 2.203119  |
| 25               | 1                | 0              | -2.022718               | -0.393520 | 2.840307  |
| 26               | 8                | 0              | -3.319073               | 0.834801  | 2.322227  |
| 27               | 1                | 0              | -3.704724               | 1.373803  | 3.031034  |
| 28               | 1                | 0              | -3.032657               | 1.474379  | 1.626207  |
| 29               | 8                | 0              | -5.277484               | -0.226397 | 0.580390  |
| 30               | 1                | 0              | -4.637713               | 0.042316  | 1.274066  |



|    |    |   |           |           |           |
|----|----|---|-----------|-----------|-----------|
| 31 | 1  | 0 | -5.075874 | 0.375764  | -0.173954 |
| 32 | 6  | 0 | 2.940126  | 1.336770  | -0.744738 |
| 33 | 1  | 0 | 3.104368  | 0.992539  | -1.770795 |
| 34 | 1  | 0 | 3.478649  | 2.283643  | -0.638038 |
| 35 | 6  | 0 | 3.619786  | 0.367928  | 0.234619  |
| 36 | 1  | 0 | 3.578000  | 0.780197  | 1.250584  |
| 37 | 7  | 0 | 3.070352  | -1.004545 | 0.379015  |
| 38 | 6  | 0 | 5.118041  | 0.247234  | -0.093308 |
| 39 | 8  | 0 | 5.729601  | 1.233959  | -0.518251 |
| 40 | 17 | 0 | 1.678058  | -1.039687 | 1.437530  |
| 41 | 7  | 0 | 5.704129  | -0.928341 | 0.146570  |
| 42 | 1  | 0 | 6.699209  | -1.028818 | -0.021604 |
| 43 | 1  | 0 | 5.177845  | -1.712863 | 0.511188  |
| 44 | 17 | 0 | 2.629253  | -1.682789 | -1.178713 |
| 45 | 1  | 0 | -0.603738 | 2.980822  | 1.848760  |

---

## Standard orientation of TS-3,N-di-Cl-Tyr-Am-p-C5

Cartesian coordinates of the transition states optimized at the M06-2X(D3)/6-31+G(d) level:

Standard orientation of transition state of TS-3,N-di-Cl-Tyr-Am-p-C5

State=1-A

Charge = -1 Multiplicity = 1

Lowest Harmonic Vibrational Frequency (LHVF) = -352.89 cm<sup>-1</sup>

Standard orientation:

| Center<br>Number | Atomic<br>Number | Atomic<br>Type | Coordinates (Angstroms) |           |           |
|------------------|------------------|----------------|-------------------------|-----------|-----------|
|                  |                  |                | X                       | Y         | Z         |
| 1                | 1                | 0              | -1.333601               | -0.236448 | -2.316359 |
| 2                | 8                | 0              | -1.878888               | -2.070797 | 1.692424  |
| 3                | 1                | 0              | -1.267190               | -2.827175 | 1.706859  |
| 4                | 17               | 0              | -1.235662               | -1.012252 | 0.130244  |
| 5                | 8                | 0              | -4.116809               | 0.370768  | -2.126814 |
| 6                | 1                | 0              | -3.800724               | -0.557617 | -2.198938 |
| 7                | 1                | 0              | -3.353528               | 0.886444  | -1.776711 |
| 8                | 8                | 0              | -4.261245               | -2.513968 | 0.459810  |
| 9                | 1                | 0              | -3.408369               | -2.437859 | 0.955709  |
| 10               | 1                | 0              | -4.651196               | -1.610358 | 0.507557  |
| 11               | 8                | 0              | -3.432757               | -2.347650 | -2.159056 |
| 12               | 1                | 0              | -3.690881               | -2.471189 | -1.211098 |
| 13               | 1                | 0              | -2.462336               | -2.365388 | -2.160519 |
| 14               | 6                | 0              | -0.602924               | 0.152191  | -1.609845 |
| 15               | 6                | 0              | 0.166736                | 2.079622  | -0.325709 |
| 16               | 6                | 0              | 1.779124                | 0.429558  | -1.136793 |
| 17               | 6                | 0              | 1.448101                | 1.615656  | -0.408202 |
| 18               | 1                | 0              | 2.243119                | 2.172219  | 0.085023  |
| 19               | 1                | 0              | 0.979285                | -1.160522 | -2.310354 |
| 20               | 8                | 0              | -2.106869               | 1.895792  | -0.997879 |
| 21               | 6                | 0              | -0.931361               | 1.425159  | -0.999280 |
| 22               | 6                | 0              | 0.767301                | -0.252592 | -1.750326 |
| 23               | 8                | 0              | -1.450008               | 0.214108  | 3.215948  |
| 24               | 1                | 0              | -1.526456               | -0.661168 | 2.774811  |
| 25               | 1                | 0              | -2.002367               | 0.802048  | 2.659984  |
| 26               | 8                | 0              | -3.194718               | 1.685695  | 1.546489  |
| 27               | 1                | 0              | -3.509015               | 2.537519  | 1.889742  |
| 28               | 1                | 0              | -2.791508               | 1.884813  | 0.670749  |
| 29               | 8                | 0              | -5.228452               | 0.100279  | 0.405007  |
| 30               | 1                | 0              | -4.583337               | 0.628186  | 0.922422  |

|    |    |   |           |           |           |
|----|----|---|-----------|-----------|-----------|
| 31 | 1  | 0 | -4.943421 | 0.231153  | -0.529409 |
| 32 | 6  | 0 | 3.225795  | 0.009985  | -1.231977 |
| 33 | 1  | 0 | 3.322503  | -0.864997 | -1.885182 |
| 34 | 1  | 0 | 3.790590  | 0.825159  | -1.703323 |
| 35 | 6  | 0 | 3.910730  | -0.309009 | 0.116530  |
| 36 | 1  | 0 | 3.572133  | 0.380782  | 0.894982  |
| 37 | 7  | 0 | 3.747357  | -1.675868 | 0.634770  |
| 38 | 6  | 0 | 5.414709  | -0.158742 | -0.080281 |
| 39 | 8  | 0 | 6.053531  | -1.023460 | -0.695693 |
| 40 | 17 | 0 | 2.064990  | -2.008764 | 1.002670  |
| 41 | 1  | 0 | 3.971510  | -2.323368 | -0.125765 |
| 42 | 7  | 0 | 5.967041  | 0.955677  | 0.407439  |
| 43 | 1  | 0 | 6.953369  | 1.138175  | 0.254149  |
| 44 | 1  | 0 | 5.419535  | 1.638032  | 0.918328  |
| 45 | 17 | 0 | -0.186296 | 3.550181  | 0.544457  |

---

## Standard orientation of TS-3,N,N-tri-Cl-Tyr-Am-p-C5

Cartesian coordinates of the transition states optimized at the M06-2X(D3)/6-31+G(d) level:

Standard orientation of transition state of TS-3,N,N-tri-Cl-Tyr-Am-p-C5

State=1-A

Charge = -1 Multiplicity = 1

Lowest Harmonic Vibrational Frequency (LHVF) = -352.00 cm<sup>-1</sup>

Standard orientation:

| Center<br>Number | Atomic<br>Number | Atomic<br>Type | Coordinates (Angstroms) |           |           |
|------------------|------------------|----------------|-------------------------|-----------|-----------|
|                  |                  |                | X                       | Y         | Z         |
| 1                | 1                | 0              | -1.534167               | -0.126377 | -2.386592 |
| 2                | 8                | 0              | -1.652856               | -2.136760 | 1.588425  |
| 3                | 1                | 0              | -0.890854               | -2.741609 | 1.574497  |
| 4                | 17               | 0              | -1.259717               | -0.958458 | 0.030996  |
| 5                | 8                | 0              | -4.360556               | 0.069095  | -2.061314 |
| 6                | 1                | 0              | -3.905856               | -0.793550 | -2.188440 |
| 7                | 1                | 0              | -3.667696               | 0.691504  | -1.740597 |
| 8                | 8                | 0              | -3.970444               | -2.922632 | 0.391594  |
| 9                | 1                | 0              | -3.118086               | -2.755555 | 0.863668  |
| 10               | 1                | 0              | -4.470581               | -2.080556 | 0.500971  |
| 11               | 8                | 0              | -3.290070               | -2.516713 | -2.248283 |
| 12               | 1                | 0              | -3.486583               | -2.718635 | -1.299304 |
| 13               | 1                | 0              | -2.325968               | -2.412875 | -2.289241 |
| 14               | 6                | 0              | -0.842685               | 0.330121  | -1.681475 |
| 15               | 6                | 0              | -0.285313               | 2.310968  | -0.363960 |
| 16               | 6                | 0              | 1.495742                | 0.879969  | -1.229776 |
| 17               | 6                | 0              | 1.039728                | 2.007624  | -0.475482 |
| 18               | 1                | 0              | 1.772954                | 2.640000  | 0.022654  |
| 19               | 1                | 0              | 0.873907                | -0.768087 | -2.431094 |
| 20               | 8                | 0              | -2.534898               | 1.853635  | -0.986280 |
| 21               | 6                | 0              | -1.310248               | 1.536929  | -1.029836 |
| 22               | 6                | 0              | 0.564129                | 0.095357  | -1.846995 |
| 23               | 8                | 0              | -1.382442               | 0.155899  | 3.154842  |
| 24               | 1                | 0              | -1.377908               | -0.706586 | 2.682349  |
| 25               | 1                | 0              | -2.032525               | 0.686111  | 2.649013  |
| 26               | 8                | 0              | -3.412060               | 1.404081  | 1.616908  |
| 27               | 1                | 0              | -3.835368               | 2.184820  | 2.008697  |
| 28               | 1                | 0              | -3.101869               | 1.690849  | 0.728447  |
| 29               | 8                | 0              | -5.246421               | -0.448835 | 0.520869  |
| 30               | 1                | 0              | -4.648010               | 0.145641  | 1.021444  |

|    |    |   |           |           |           |
|----|----|---|-----------|-----------|-----------|
| 31 | 1  | 0 | -5.044067 | -0.246955 | -0.422373 |
| 32 | 6  | 0 | 2.974454  | 0.610704  | -1.340403 |
| 33 | 1  | 0 | 3.151543  | -0.188370 | -2.066796 |
| 34 | 1  | 0 | 3.483881  | 1.502632  | -1.718169 |
| 35 | 6  | 0 | 3.672123  | 0.266628  | -0.016421 |
| 36 | 1  | 0 | 3.616468  | 1.124236  | 0.665746  |
| 37 | 7  | 0 | 3.156052  | -0.868459 | 0.789803  |
| 38 | 6  | 0 | 5.174967  | 0.035216  | -0.253162 |
| 39 | 8  | 0 | 5.759871  | 0.676189  | -1.133256 |
| 40 | 17 | 0 | 1.749010  | -0.415778 | 1.726132  |
| 41 | 7  | 0 | 5.792496  | -0.829575 | 0.555237  |
| 42 | 1  | 0 | 6.791114  | -0.974811 | 0.454110  |
| 43 | 1  | 0 | 5.286244  | -1.328099 | 1.276892  |
| 44 | 17 | 0 | -0.796868 | 3.707154  | 0.549663  |
| 45 | 17 | 0 | 2.757294  | -2.241756 | -0.227035 |

---

## Standard orientation of TS-Tyr-Am-N

Cartesian coordinates of the transition states optimized at the B3LYP(D3BJ)/6-31+G(d) level:

Standard orientation of transition state of TS-Tyr-Am-N

State=1-A

Charge = 0 Multiplicity = 1

Lowest Harmonic Vibrational Frequency (LHVF) = -663.45 cm<sup>-1</sup>

Standard orientation:

| Center<br>Number | Atomic<br>Number | Atomic<br>Type | Coordinates (Angstroms) |           |           |
|------------------|------------------|----------------|-------------------------|-----------|-----------|
|                  |                  |                | X                       | Y         | Z         |
| 1                | 8                | 0              | 4.245004                | 1.426729  | 0.378918  |
| 2                | 1                | 0              | 4.543857                | 2.284570  | 0.032866  |
| 3                | 8                | 0              | 4.207517                | -0.246364 | -1.425422 |
| 4                | 1                | 0              | 4.425370                | -1.064355 | -0.943404 |
| 5                | 1                | 0              | 4.253621                | 0.672221  | -0.491639 |
| 6                | 8                | 0              | 1.697774                | -0.799051 | -1.986244 |
| 7                | 1                | 0              | 2.683078                | -0.561630 | -1.806902 |
| 8                | 1                | 0              | 1.666174                | -1.238222 | -2.851737 |
| 9                | 6                | 0              | -1.865386               | 1.236640  | -1.563310 |
| 10               | 1                | 0              | -2.502297               | 2.073813  | -1.865190 |
| 11               | 6                | 0              | -0.729495               | 1.840949  | -0.698572 |
| 12               | 6                | 0              | -1.247273               | 2.525044  | 0.566464  |
| 13               | 8                | 0              | -1.236989               | 1.923034  | 1.653086  |
| 14               | 1                | 0              | -0.151905               | 2.536056  | -1.310731 |
| 15               | 7                | 0              | 0.186431                | 0.753966  | -0.267771 |
| 16               | 1                | 0              | 0.409106                | 0.089509  | -1.041180 |
| 17               | 17               | 0              | 1.851472                | 1.284491  | 0.224295  |
| 18               | 8                | 0              | 4.164498                | -2.680655 | 0.443582  |
| 19               | 1                | 0              | 3.180908                | -2.736303 | 0.327309  |
| 20               | 1                | 0              | 4.414217                | -3.497080 | 0.908189  |
| 21               | 8                | 0              | 1.432060                | -2.680833 | 0.000744  |
| 22               | 1                | 0              | 1.467780                | -2.043884 | -0.759790 |
| 23               | 1                | 0              | 1.216179                | -3.538921 | -0.401174 |
| 24               | 8                | 0              | 4.562858                | -0.580769 | 2.277695  |
| 25               | 1                | 0              | 4.507459                | 0.219279  | 1.706851  |
| 26               | 1                | 0              | 4.416343                | -1.327951 | 1.650960  |
| 27               | 1                | 0              | -1.395640               | 0.837994  | -2.468361 |
| 28               | 6                | 0              | -2.671707               | 0.164079  | -0.869804 |
| 29               | 6                | 0              | -2.290186               | -1.182325 | -0.951817 |
| 30               | 6                | 0              | -3.796032               | 0.489535  | -0.096626 |

|    |   |   |           |           |           |
|----|---|---|-----------|-----------|-----------|
| 31 | 6 | 0 | -2.999856 | -2.178349 | -0.278877 |
| 32 | 1 | 0 | -1.426543 | -1.461519 | -1.551116 |
| 33 | 6 | 0 | -4.519038 | -0.493413 | 0.577860  |
| 34 | 1 | 0 | -4.112684 | 1.526714  | -0.021534 |
| 35 | 6 | 0 | -4.115098 | -1.828914 | 0.486745  |
| 36 | 8 | 0 | -4.859319 | -2.771660 | 1.169839  |
| 37 | 1 | 0 | -4.478890 | -3.655184 | 1.020215  |
| 38 | 7 | 0 | -1.719206 | 3.764062  | 0.397302  |
| 39 | 1 | 0 | -2.144803 | 4.253251  | 1.177528  |
| 40 | 1 | 0 | -1.711517 | 4.213433  | -0.511524 |
| 41 | 1 | 0 | -0.221332 | 0.247929  | 0.529574  |
| 42 | 1 | 0 | -2.695298 | -3.219622 | -0.349819 |
| 43 | 1 | 0 | -5.391590 | -0.235581 | 1.170900  |

---

## Standard orientation of TS-5-Cl-Tyr-Am-N

Cartesian coordinates of the transition states optimized at the B3LYP(D3BJ)/6-31+G(d) level:

Standard orientation of transition state of TS-5-Cl-Tyr-Am-N

State=1-A

Charge = 0 Multiplicity = 1

Lowest Harmonic Vibrational Frequency (LHVF) = -675.59 cm<sup>-1</sup>

Standard orientation:

| Center<br>Number | Atomic<br>Number | Atomic<br>Type | Coordinates (Angstroms) |           |           |
|------------------|------------------|----------------|-------------------------|-----------|-----------|
|                  |                  |                | X                       | Y         | Z         |
| 1                | 8                | 0              | 4.726357                | 0.822277  | 0.209437  |
| 2                | 1                | 0              | 5.220289                | 1.531877  | -0.234904 |
| 3                | 8                | 0              | 4.248807                | -0.998020 | -1.376045 |
| 4                | 1                | 0              | 4.226796                | -1.774433 | -0.788075 |
| 5                | 1                | 0              | 4.533195                | -0.010975 | -0.562739 |
| 6                | 8                | 0              | 1.693141                | -0.930196 | -1.989181 |
| 7                | 1                | 0              | 2.703482                | -0.943185 | -1.791056 |
| 8                | 1                | 0              | 1.559949                | -1.425782 | -2.813517 |
| 9                | 6                | 0              | -1.399610               | 1.885397  | -1.546389 |
| 10               | 1                | 0              | -1.919832               | 2.816458  | -1.790632 |
| 11               | 6                | 0              | -0.117430               | 2.283271  | -0.769643 |
| 12               | 6                | 0              | -0.418946               | 3.045856  | 0.521267  |
| 13               | 8                | 0              | -0.457620               | 2.445701  | 1.608007  |
| 14               | 1                | 0              | 0.527420                | 2.865808  | -1.430080 |
| 15               | 7                | 0              | 0.614829                | 1.049335  | -0.391208 |
| 16               | 1                | 0              | 0.681841                | 0.357124  | -1.169221 |
| 17               | 17               | 0              | 2.364998                | 1.247770  | 0.050786  |
| 18               | 8                | 0              | 3.509588                | -3.080500 | 0.774212  |
| 19               | 1                | 0              | 2.550192                | -2.884899 | 0.617283  |
| 20               | 1                | 0              | 3.519888                | -3.871255 | 1.339412  |
| 21               | 8                | 0              | 0.895767                | -2.369390 | 0.216962  |
| 22               | 1                | 0              | 1.105200                | -1.920557 | -0.642263 |
| 23               | 1                | 0              | 0.341341                | -3.130604 | -0.021923 |
| 24               | 8                | 0              | 4.467148                | -0.947672 | 2.349966  |
| 25               | 1                | 0              | 4.640129                | -0.247394 | 1.680845  |
| 26               | 1                | 0              | 4.119789                | -1.701980 | 1.818465  |
| 27               | 1                | 0              | -1.073741               | 1.432552  | -2.487973 |
| 28               | 6                | 0              | -2.310805               | 0.941226  | -0.796803 |
| 29               | 6                | 0              | -2.166993               | -0.442587 | -0.946962 |
| 30               | 6                | 0              | -3.287833               | 1.420934  | 0.087952  |



|    |    |   |           |           |           |
|----|----|---|-----------|-----------|-----------|
| 31 | 6  | 0 | -2.973160 | -1.315026 | -0.219714 |
| 32 | 1  | 0 | -1.425922 | -0.847009 | -1.630049 |
| 33 | 6  | 0 | -4.096763 | 0.547050  | 0.806977  |
| 34 | 1  | 0 | -3.417896 | 2.492008  | 0.214637  |
| 35 | 6  | 0 | -3.947208 | -0.836674 | 0.665216  |
| 36 | 8  | 0 | -4.773845 | -1.648172 | 1.398693  |
| 37 | 1  | 0 | -4.572503 | -2.586221 | 1.226250  |
| 38 | 7  | 0 | -0.657330 | 4.352593  | 0.374193  |
| 39 | 1  | 0 | -0.937556 | 4.908193  | 1.175406  |
| 40 | 1  | 0 | -0.620463 | 4.797938  | -0.535962 |
| 41 | 17 | 0 | -2.772601 | -3.055214 | -0.421832 |
| 42 | 1  | 0 | -4.855863 | 0.920029  | 1.487786  |
| 43 | 1  | 0 | 0.158753  | 0.606471  | 0.417396  |

---

## Standard orientation of TS-3-Cl-Tyr-Am-N

Cartesian coordinates of the transition states optimized at the B3LYP(D3BJ)/6-31+G(d) level:

Standard orientation of transition state of TS-3-Cl-Tyr-Am-N

State=1-A

Charge = 0 Multiplicity = 1

Lowest Harmonic Vibrational Frequency (LHVF) = -688.93 cm<sup>-1</sup>

Standard orientation:

| Center<br>Number | Atomic<br>Number | Atomic<br>Type | Coordinates (Angstroms) |           |           |
|------------------|------------------|----------------|-------------------------|-----------|-----------|
|                  |                  |                | X                       | Y         | Z         |
| 1                | 8                | 0              | -4.732205               | -1.405790 | 0.621068  |
| 2                | 1                | 0              | -5.055273               | -2.264595 | 0.300160  |
| 3                | 8                | 0              | -4.816602               | 0.257858  | -1.188999 |
| 4                | 1                | 0              | -4.976576               | 1.081726  | -0.694462 |
| 5                | 1                | 0              | -4.799542               | -0.654104 | -0.251714 |
| 6                | 8                | 0              | -2.364568               | 0.764119  | -1.981034 |
| 7                | 1                | 0              | -3.334559               | 0.544902  | -1.712289 |
| 8                | 1                | 0              | -2.395717               | 1.149778  | -2.871592 |
| 9                | 6                | 0              | 1.215572                | -1.251282 | -1.794874 |
| 10               | 1                | 0              | 1.829651                | -2.087971 | -2.141137 |
| 11               | 6                | 0              | 0.147689                | -1.851360 | -0.845489 |
| 12               | 6                | 0              | 0.759035                | -2.527552 | 0.381839  |
| 13               | 8                | 0              | 0.826716                | -1.920144 | 1.463135  |
| 14               | 1                | 0              | -0.471518               | -2.551021 | -1.409575 |
| 15               | 7                | 0              | -0.734124               | -0.761400 | -0.358252 |
| 16               | 1                | 0              | -1.023146               | -0.111279 | -1.122894 |
| 17               | 17               | 0              | -2.352562               | -1.284982 | 0.276934  |
| 18               | 8                | 0              | -4.554519               | 2.709119  | 0.648333  |
| 19               | 1                | 0              | -3.589230               | 2.760624  | 0.425665  |
| 20               | 1                | 0              | -4.751985               | 3.531979  | 1.126494  |
| 21               | 8                | 0              | -1.882928               | 2.682920  | -0.074266 |
| 22               | 1                | 0              | -2.003034               | 2.038043  | -0.819148 |
| 23               | 1                | 0              | -1.693729               | 3.532927  | -0.505649 |
| 24               | 8                | 0              | -4.765777               | 0.627814  | 2.531595  |
| 25               | 1                | 0              | -4.800037               | -0.177787 | 1.968357  |
| 26               | 1                | 0              | -4.681296               | 1.366083  | 1.883131  |
| 27               | 1                | 0              | 0.682349                | -0.851602 | -2.663370 |
| 28               | 6                | 0              | 2.068758                | -0.176599 | -1.162978 |
| 29               | 6                | 0              | 1.687255                | 1.171143  | -1.219901 |
| 30               | 6                | 0              | 3.236898                | -0.511160 | -0.468072 |

|    |    |   |           |           |           |
|----|----|---|-----------|-----------|-----------|
| 31 | 6  | 0 | 2.443746  | 2.159082  | -0.593492 |
| 32 | 1  | 0 | 0.787657  | 1.454820  | -1.760069 |
| 33 | 6  | 0 | 3.994198  | 0.477253  | 0.154150  |
| 34 | 1  | 0 | 3.560270  | -1.545805 | -0.408824 |
| 35 | 6  | 0 | 3.608115  | 1.823194  | 0.103843  |
| 36 | 8  | 0 | 4.386366  | 2.759732  | 0.732375  |
| 37 | 1  | 0 | 3.996691  | 3.642516  | 0.600856  |
| 38 | 7  | 0 | 1.222228  | -3.765254 | 0.182822  |
| 39 | 1  | 0 | 1.706303  | -4.249491 | 0.931495  |
| 40 | 1  | 0 | 1.150885  | -4.217693 | -0.721735 |
| 41 | 1  | 0 | -0.265903 | -0.240175 | 0.394825  |
| 42 | 17 | 0 | 5.460146  | 0.029153  | 1.015606  |
| 43 | 1  | 0 | 2.142640  | 3.202460  | -0.641515 |

---

## Standard orientation of TS-3,5-di-Cl-Tyr-Am-N

Cartesian coordinates of the transition states optimized at the B3LYP(D3BJ)/6-31+G(d) level:

Standard orientation of transition state of TS-3,5-di-Cl-Tyr-Am-N

State=1-A

Charge = 0 Multiplicity = 1

Lowest Harmonic Vibrational Frequency (LHVF) = -667.11 cm<sup>-1</sup>

Standard orientation:

| Center<br>Number | Atomic<br>Number | Atomic<br>Type | Coordinates (Angstroms) |           |           |
|------------------|------------------|----------------|-------------------------|-----------|-----------|
|                  |                  |                | X                       | Y         | Z         |
| 1                | 8                | 0              | -5.002915               | -1.292777 | 0.473588  |
| 2                | 1                | 0              | -5.417914               | -2.082535 | 0.087513  |
| 3                | 8                | 0              | -4.884502               | 0.503897  | -1.203381 |
| 4                | 1                | 0              | -4.988629               | 1.301451  | -0.654846 |
| 5                | 1                | 0              | -4.977739               | -0.474892 | -0.336363 |
| 6                | 8                | 0              | -2.371277               | 0.827237  | -1.904268 |
| 7                | 1                | 0              | -3.363908               | 0.689713  | -1.668416 |
| 8                | 1                | 0              | -2.344649               | 1.340340  | -2.728276 |
| 9                | 6                | 0              | 0.982997                | -1.599001 | -1.824309 |
| 10               | 1                | 0              | 1.550802                | -2.464315 | -2.178127 |
| 11               | 6                | 0              | -0.148986               | -2.147438 | -0.917857 |
| 12               | 6                | 0              | 0.379294                | -2.913810 | 0.296610  |
| 13               | 8                | 0              | 0.474530                | -2.347182 | 1.397797  |
| 14               | 1                | 0              | -0.809096               | -2.773047 | -1.521279 |
| 15               | 7                | 0              | -0.948956               | -1.007853 | -0.403139 |
| 16               | 1                | 0              | -1.153811               | -0.295006 | -1.137724 |
| 17               | 17               | 0              | -2.628581               | -1.403644 | 0.166621  |
| 18               | 8                | 0              | -4.394037               | 2.786063  | 0.885169  |
| 19               | 1                | 0              | -3.425258               | 2.697925  | 0.691806  |
| 20               | 1                | 0              | -4.468391               | 3.570647  | 1.454172  |
| 21               | 8                | 0              | -1.727198               | 2.396072  | 0.258816  |
| 22               | 1                | 0              | -1.896174               | 1.902337  | -0.584881 |
| 23               | 1                | 0              | -1.319520               | 3.234617  | -0.014213 |
| 24               | 8                | 0              | -4.942015               | 0.570105  | 2.543403  |
| 25               | 1                | 0              | -5.024065               | -0.170132 | 1.899971  |
| 26               | 1                | 0              | -4.744670               | 1.354409  | 1.979437  |
| 27               | 1                | 0              | 0.503922                | -1.137186 | -2.692962 |
| 28               | 6                | 0              | 1.888654                | -0.606452 | -1.134768 |
| 29               | 6                | 0              | 1.582017                | 0.758217  | -1.148575 |
| 30               | 6                | 0              | 3.015438                | -1.039180 | -0.426577 |

|    |    |   |           |           |           |
|----|----|---|-----------|-----------|-----------|
| 31 | 6  | 0 | 2.382132  | 1.659445  | -0.454509 |
| 32 | 1  | 0 | 0.721068  | 1.124635  | -1.698848 |
| 33 | 6  | 0 | 3.809718  | -0.124370 | 0.254580  |
| 34 | 1  | 0 | 3.274484  | -2.092717 | -0.403863 |
| 35 | 6  | 0 | 3.513585  | 1.246944  | 0.263638  |
| 36 | 8  | 0 | 4.327993  | 2.092413  | 0.951835  |
| 37 | 1  | 0 | 4.014837  | 3.011697  | 0.861211  |
| 38 | 7  | 0 | 0.740251  | -4.179793 | 0.067920  |
| 39 | 1  | 0 | 1.163727  | -4.725132 | 0.811295  |
| 40 | 1  | 0 | 0.651970  | -4.598983 | -0.851033 |
| 41 | 17 | 0 | 1.977698  | 3.371958  | -0.474704 |
| 42 | 1  | 0 | -0.461073 | -0.565605 | 0.387065  |
| 43 | 17 | 0 | 5.221548  | -0.687575 | 1.129955  |

---

## Standard orientation of TS-N-Cl-Tyr-Am-N

Cartesian coordinates of the transition states optimized at the B3LYP(D3BJ)/6-31+G(d) level:

Standard orientation of transition state of TS-N-Cl-Tyr-Am-N

State=1-A

Charge = 0 Multiplicity = 1

Lowest Harmonic Vibrational Frequency (LHVF) = -383.17 cm<sup>-1</sup>

Standard orientation:

| Center<br>Number | Atomic<br>Number | Atomic<br>Type | Coordinates (Angstroms) |           |           |
|------------------|------------------|----------------|-------------------------|-----------|-----------|
|                  |                  |                | X                       | Y         | Z         |
| 1                | 8                | 0              | -4.162684               | 1.744889  | -0.481950 |
| 2                | 1                | 0              | -4.308808               | 2.659530  | -0.183598 |
| 3                | 8                | 0              | -4.256836               | 0.177770  | 1.446078  |
| 4                | 1                | 0              | -4.735273               | -0.583254 | 1.070504  |
| 5                | 1                | 0              | -4.245165               | 1.082820  | 0.406974  |
| 6                | 8                | 0              | -1.954309               | -0.868479 | 1.800481  |
| 7                | 1                | 0              | -2.904268               | -0.402423 | 1.686857  |
| 8                | 1                | 0              | -1.769811               | -0.936065 | 2.752006  |
| 9                | 6                | 0              | 1.726009                | 0.692206  | 1.660287  |
| 10               | 1                | 0              | 2.141187                | 1.484247  | 2.293932  |
| 11               | 6                | 0              | 0.614034                | 1.398809  | 0.844330  |
| 12               | 6                | 0              | 1.102615                | 2.448843  | -0.160134 |
| 13               | 8                | 0              | 1.138017                | 2.234636  | -1.378166 |
| 14               | 1                | 0              | -0.030131               | 1.895422  | 1.577220  |
| 15               | 7                | 0              | -0.337902               | 0.433080  | 0.215100  |
| 16               | 1                | 0              | -0.810969               | -0.179259 | 0.979643  |
| 17               | 17               | 0              | -1.889225               | 1.245324  | -0.381736 |
| 18               | 8                | 0              | -5.076178               | -2.278303 | -0.171865 |
| 19               | 1                | 0              | -4.160982               | -2.634076 | -0.029986 |
| 20               | 1                | 0              | -5.586371               | -3.020514 | -0.537385 |
| 21               | 8                | 0              | -2.486688               | -3.116911 | 0.318708  |
| 22               | 1                | 0              | -2.239017               | -2.366214 | 0.916723  |
| 23               | 1                | 0              | -2.571419               | -3.887957 | 0.904221  |
| 24               | 8                | 0              | -4.881659               | -0.360720 | -2.215866 |
| 25               | 1                | 0              | -4.681584               | 0.465316  | -1.725838 |
| 26               | 1                | 0              | -4.937441               | -1.047207 | -1.509328 |
| 27               | 1                | 0              | 1.223446                | -0.011375 | 2.331614  |
| 28               | 6                | 0              | 2.833698                | -0.008347 | 0.908328  |
| 29               | 6                | 0              | 2.937220                | -1.404405 | 0.946591  |
| 30               | 6                | 0              | 3.794308                | 0.706210  | 0.177452  |

|    |    |   |          |           |           |
|----|----|---|----------|-----------|-----------|
| 31 | 6  | 0 | 3.948822 | -2.077817 | 0.260924  |
| 32 | 1  | 0 | 2.207569 | -1.978717 | 1.511670  |
| 33 | 6  | 0 | 4.807365 | 0.050073  | -0.520521 |
| 34 | 1  | 0 | 3.762018 | 1.791451  | 0.150581  |
| 35 | 6  | 0 | 4.878193 | -1.345420 | -0.482784 |
| 36 | 8  | 0 | 5.896407 | -1.953694 | -1.192014 |
| 37 | 1  | 0 | 5.827562 | -2.919653 | -1.095027 |
| 38 | 7  | 0 | 1.484643 | 3.602734  | 0.405946  |
| 39 | 1  | 0 | 1.892636 | 4.330176  | -0.171413 |
| 40 | 1  | 0 | 1.448984 | 3.745261  | 1.409155  |
| 41 | 1  | 0 | 4.015908 | -3.162396 | 0.297378  |
| 42 | 1  | 0 | 5.544770 | 0.610161  | -1.087996 |
| 43 | 17 | 0 | 0.319098 | -0.691229 | -0.977400 |

---

## Standard orientation of TS-3,N-di-Cl-Tyr-Am-N

Cartesian coordinates of the transition states optimized at the B3LYP(D3BJ)/6-31+G(d) level:

Standard orientation of transition state of TS-3,N-di-Cl-Tyr-Am-N

State=1-A

Charge = 0 Multiplicity = 1

Lowest Harmonic Vibrational Frequency (LHVF) = -416.52 cm<sup>-1</sup>

Standard orientation:

| Center<br>Number | Atomic<br>Number | Atomic<br>Type | Coordinates (Angstroms) |           |           |
|------------------|------------------|----------------|-------------------------|-----------|-----------|
|                  |                  |                | X                       | Y         | Z         |
| 1                | 8                | 0              | -4.524351               | 1.913963  | -0.514871 |
| 2                | 1                | 0              | -4.632466               | 2.821624  | -0.181145 |
| 3                | 8                | 0              | -4.777939               | 0.281624  | 1.339684  |
| 4                | 1                | 0              | -5.296387               | -0.432254 | 0.926347  |
| 5                | 1                | 0              | -4.676451               | 1.218294  | 0.343279  |
| 6                | 8                | 0              | -2.564648               | -0.930595 | 1.713097  |
| 7                | 1                | 0              | -3.478774               | -0.396274 | 1.595305  |
| 8                | 1                | 0              | -2.418417               | -1.060038 | 2.664934  |
| 9                | 6                | 0              | 1.181106                | 0.443651  | 1.837114  |
| 10               | 1                | 0              | 1.592150                | 1.179494  | 2.537190  |
| 11               | 6                | 0              | 0.153120                | 1.244326  | 1.000673  |
| 12               | 6                | 0              | 0.754937                | 2.308084  | 0.075694  |
| 13               | 8                | 0              | 0.893115                | 2.126439  | -1.140409 |
| 14               | 1                | 0              | -0.501730               | 1.741927  | 1.723195  |
| 15               | 7                | 0              | -0.813308               | 0.361875  | 0.277858  |
| 16               | 1                | 0              | -1.358171               | -0.261010 | 0.987510  |
| 17               | 17               | 0              | -2.288184               | 1.286889  | -0.350043 |
| 18               | 8                | 0              | -5.729675               | -2.041857 | -0.384001 |
| 19               | 1                | 0              | -4.837915               | -2.458591 | -0.259199 |
| 20               | 1                | 0              | -6.287288               | -2.737894 | -0.770344 |
| 21               | 8                | 0              | -3.189247               | -3.036684 | 0.060815  |
| 22               | 1                | 0              | -2.916588               | -2.348711 | 0.719639  |
| 23               | 1                | 0              | -3.292953               | -3.853755 | 0.576639  |
| 24               | 8                | 0              | -5.361268               | -0.065303 | -2.344746 |
| 25               | 1                | 0              | -5.107207               | 0.721863  | -1.817139 |
| 26               | 1                | 0              | -5.485623               | -0.773409 | -1.668927 |
| 27               | 17               | 0              | -0.155113               | -0.738342 | -0.935135 |
| 28               | 1                | 0              | 0.613603                | -0.275248 | 2.436372  |
| 29               | 6                | 0              | 2.303555                | -0.263108 | 1.113051  |
| 30               | 6                | 0              | 2.341347                | -1.661776 | 1.056111  |



|    |    |   |          |           |           |
|----|----|---|----------|-----------|-----------|
| 31 | 6  | 0 | 3.344609 | 0.455109  | 0.513146  |
| 32 | 6  | 0 | 3.374738 | -2.329708 | 0.404313  |
| 33 | 1  | 0 | 1.546531 | -2.238340 | 1.520607  |
| 34 | 6  | 0 | 4.373823 | -0.212191 | -0.145171 |
| 35 | 1  | 0 | 3.368933 | 1.538623  | 0.560983  |
| 36 | 6  | 0 | 4.404206 | -1.610826 | -0.211272 |
| 37 | 1  | 0 | 3.394095 | -3.415822 | 0.364093  |
| 38 | 8  | 0 | 5.442597 | -2.221138 | -0.864926 |
| 39 | 1  | 0 | 5.334208 | -3.187177 | -0.807679 |
| 40 | 17 | 0 | 5.665795 | 0.716866  | -0.894353 |
| 41 | 7  | 0 | 1.122027 | 3.430343  | 0.710121  |
| 42 | 1  | 0 | 1.603607 | 4.160417  | 0.195885  |
| 43 | 1  | 0 | 0.996027 | 3.545778  | 1.709548  |

---

## Standard orientation of TS-5,N-di-Cl-Tyr-Am-N

Cartesian coordinates of the transition states optimized at the B3LYP(D3BJ)/6-31+G(d) level:

Standard orientation of transition state of TS-5,N-di-Cl-Tyr-Am-N

State=1-A

Charge = 0 Multiplicity = 1

Lowest Harmonic Vibrational Frequency (LHVF) = -440.15 cm<sup>-1</sup>

Standard orientation:

| Center<br>Number | Atomic<br>Number | Atomic<br>Type | Coordinates (Angstroms) |           |           |
|------------------|------------------|----------------|-------------------------|-----------|-----------|
|                  |                  |                | X                       | Y         | Z         |
| 1                | 8                | 0              | -4.762023               | 1.349426  | -0.380088 |
| 2                | 1                | 0              | -5.050532               | 2.214165  | -0.039619 |
| 3                | 8                | 0              | -4.533761               | -0.272678 | 1.483577  |
| 4                | 1                | 0              | -4.900792               | -1.091302 | 1.103816  |
| 5                | 1                | 0              | -4.702361               | 0.646231  | 0.486682  |
| 6                | 8                | 0              | -2.088587               | -0.946236 | 1.746840  |
| 7                | 1                | 0              | -3.105047               | -0.635202 | 1.671574  |
| 8                | 1                | 0              | -1.861007               | -0.990446 | 2.690504  |
| 9                | 6                | 0              | 1.237254                | 1.148115  | 1.638903  |
| 10               | 1                | 0              | 1.541746                | 1.963336  | 2.304412  |
| 11               | 6                | 0              | 0.044430                | 1.724806  | 0.836679  |
| 12               | 6                | 0              | 0.393482                | 2.864292  | -0.128012 |
| 13               | 8                | 0              | 0.442874                | 2.702145  | -1.353544 |
| 14               | 1                | 0              | -0.662451               | 2.105631  | 1.581457  |
| 15               | 7                | 0              | -0.762276               | 0.655509  | 0.173902  |
| 16               | 1                | 0              | -1.117292               | -0.056962 | 0.920060  |
| 17               | 17               | 0              | -2.437188               | 1.238251  | -0.358640 |
| 18               | 8                | 0              | -5.005066               | -2.799154 | -0.150958 |
| 19               | 1                | 0              | -4.035785               | -2.994754 | -0.071590 |
| 20               | 1                | 0              | -5.401315               | -3.606627 | -0.519199 |
| 21               | 8                | 0              | -2.283396               | -3.187022 | 0.172043  |
| 22               | 1                | 0              | -2.142885               | -2.442449 | 0.810381  |
| 23               | 1                | 0              | -2.195400               | -3.996431 | 0.702679  |
| 24               | 8                | 0              | -5.228403               | -0.816832 | -2.134155 |
| 25               | 1                | 0              | -5.134302               | 0.019154  | -1.629482 |
| 26               | 1                | 0              | -5.140174               | -1.520332 | -1.448200 |
| 27               | 17               | 0              | 0.033548                | -0.300020 | -1.079522 |
| 28               | 1                | 0              | 0.835409                | 0.356400  | 2.279271  |
| 29               | 6                | 0              | 2.434232                | 0.636520  | 0.872616  |
| 30               | 6                | 0              | 2.709380                | -0.733506 | 0.854369  |

|    |    |   |          |           |           |
|----|----|---|----------|-----------|-----------|
| 31 | 6  | 0 | 3.305784 | 1.502244  | 0.195332  |
| 32 | 6  | 0 | 3.814348 | -1.219798 | 0.161602  |
| 33 | 1  | 0 | 2.055101 | -1.428551 | 1.371396  |
| 34 | 6  | 0 | 4.408592 | 1.013500  | -0.498608 |
| 35 | 1  | 0 | 3.133164 | 2.573732  | 0.213905  |
| 36 | 6  | 0 | 4.677844 | -0.358389 | -0.526391 |
| 37 | 8  | 0 | 5.782274 | -0.783761 | -1.219615 |
| 38 | 1  | 0 | 5.877976 | -1.751316 | -1.146487 |
| 39 | 7  | 0 | 0.642999 | 4.032150  | 0.481239  |
| 40 | 1  | 0 | 0.952873 | 4.825588  | -0.069620 |
| 41 | 1  | 0 | 0.596969 | 4.131761  | 1.489268  |
| 42 | 17 | 0 | 4.136889 | -2.953250 | 0.142946  |
| 43 | 1  | 0 | 5.082467 | 1.686276  | -1.020261 |

---

## Standard orientation of TS-3,5,*N*-tri-Cl-Tyr-Am-N

Cartesian coordinates of the transition states optimized at the B3LYP(D3BJ)/6-31+G(d) level:

Standard orientation of transition state of TS-3,5,*N*-tri-Cl-Tyr-Am-N

State=1-A

Charge = 0 Multiplicity = 1

Lowest Harmonic Vibrational Frequency (LHVF) = -422.26 cm<sup>-1</sup>

Standard orientation:

| Center<br>Number | Atomic<br>Number | Atomic<br>Type | Coordinates (Angstroms) |           |           |
|------------------|------------------|----------------|-------------------------|-----------|-----------|
|                  |                  |                | X                       | Y         | Z         |
| 1                | 8                | 0              | 4.945916                | -1.763867 | -0.497749 |
| 2                | 1                | 0              | 5.124684                | -2.657878 | -0.157373 |
| 3                | 8                | 0              | 5.043783                | -0.106541 | 1.349862  |
| 4                | 1                | 0              | 5.513149                | 0.642704  | 0.940612  |
| 5                | 1                | 0              | 5.032154                | -1.054101 | 0.357980  |
| 6                | 8                | 0              | 2.738058                | 0.929217  | 1.684461  |
| 7                | 1                | 0              | 3.694076                | 0.468658  | 1.580718  |
| 8                | 1                | 0              | 2.563615                | 1.039675  | 2.633983  |
| 9                | 6                | 0              | -0.844150               | -0.735012 | 1.835805  |
| 10               | 1                | 0              | -1.166490               | -1.475100 | 2.576240  |
| 11               | 6                | 0              | 0.241105                | -1.463780 | 1.005441  |
| 12               | 6                | 0              | -0.278730               | -2.598056 | 0.113208  |
| 13               | 8                | 0              | -0.436840               | -2.458372 | -1.105844 |
| 14               | 1                | 0              | 0.947298                | -1.882779 | 1.730116  |
| 15               | 7                | 0              | 1.116883                | -0.517542 | 0.249600  |
| 16               | 1                | 0              | 1.606635                | 0.167098  | 0.945237  |
| 17               | 17               | 0              | 2.667467                | -1.322687 | -0.359589 |
| 18               | 8                | 0              | 5.825091                | 2.296353  | -0.354208 |
| 19               | 1                | 0              | 4.896105                | 2.629862  | -0.253746 |
| 20               | 1                | 0              | 6.321046                | 3.032399  | -0.750484 |
| 21               | 8                | 0              | 3.196074                | 3.066438  | 0.021353  |
| 22               | 1                | 0              | 2.972952                | 2.364294  | 0.683637  |
| 23               | 1                | 0              | 3.227491                | 3.893337  | 0.531013  |
| 24               | 8                | 0              | 5.668598                | 0.280812  | -2.307509 |
| 25               | 1                | 0              | 5.467515                | -0.525030 | -1.785392 |
| 26               | 1                | 0              | 5.715203                | 0.997362  | -1.630835 |
| 27               | 17               | 0              | 0.354512                | 0.487393  | -0.985000 |
| 28               | 1                | 0              | -0.344958               | 0.066372  | 2.388811  |
| 29               | 6                | 0              | -2.045931               | -0.189249 | 1.099819  |
| 30               | 6                | 0              | -2.217787               | 1.190877  | 0.966213  |

|    |    |   |           |           |           |
|----|----|---|-----------|-----------|-----------|
| 31 | 6  | 0 | -3.012005 | -1.043799 | 0.555616  |
| 32 | 6  | 0 | -3.314676 | 1.696225  | 0.277379  |
| 33 | 1  | 0 | -1.489387 | 1.875669  | 1.387689  |
| 34 | 6  | 0 | -4.098448 | -0.523595 | -0.137510 |
| 35 | 1  | 0 | -2.928728 | -2.118823 | 0.669986  |
| 36 | 6  | 0 | -4.276753 | 0.857347  | -0.303753 |
| 37 | 8  | 0 | -5.360378 | 1.301736  | -0.997282 |
| 38 | 1  | 0 | -5.346239 | 2.274635  | -1.062770 |
| 39 | 17 | 0 | -5.288758 | -1.615532 | -0.822043 |
| 40 | 7  | 0 | -0.557283 | -3.727986 | 0.778048  |
| 41 | 1  | 0 | -0.976958 | -4.507800 | 0.282901  |
| 42 | 1  | 0 | -0.409868 | -3.812838 | 1.777624  |
| 43 | 17 | 0 | -3.510553 | 3.438416  | 0.116194  |

---

## Standard orientation of TS-NacTyr-p-C3

Cartesian coordinates of the transition states optimized at the M06-2X(D3)/6-31+G(d) level:

Standard orientation of transition state of TS-NacTyr-p-C3

State=1-A

Charge = -2 Multiplicity = 1

Lowest Harmonic Vibrational Frequency (LHVF) = -349.11 cm<sup>-1</sup>

Standard orientation:

| Center<br>Number | Atomic<br>Number | Atomic<br>Type | Coordinates (Angstroms) |           |           |
|------------------|------------------|----------------|-------------------------|-----------|-----------|
|                  |                  |                | X                       | Y         | Z         |
| 1                | 1                | 0              | 0.983700                | -0.054765 | 1.812773  |
| 2                | 8                | 0              | 3.306739                | -2.213636 | -1.255971 |
| 3                | 1                | 0              | 2.917924                | -3.104379 | -1.301086 |
| 4                | 17               | 0              | 1.935999                | -1.185246 | -0.298536 |
| 5                | 8                | 0              | 3.390254                | 1.400940  | 2.277245  |
| 6                | 1                | 0              | 3.309329                | 0.447288  | 2.501286  |
| 7                | 1                | 0              | 2.687011                | 1.581684  | 1.605836  |
| 8                | 8                | 0              | 5.154897                | -1.660258 | 0.674715  |
| 9                | 1                | 0              | 4.541842                | -1.963325 | -0.037454 |
| 10               | 1                | 0              | 5.278992                | -0.699408 | 0.494367  |
| 11               | 8                | 0              | 3.455843                | -1.350971 | 2.820803  |
| 12               | 1                | 0              | 4.047766                | -1.535092 | 2.049317  |
| 13               | 1                | 0              | 2.585863                | -1.694143 | 2.561488  |
| 14               | 6                | 0              | 0.455676                | -0.004509 | 0.862667  |
| 15               | 6                | 0              | -0.260095               | 1.379470  | -1.031348 |
| 16               | 6                | 0              | -1.608827               | -0.552699 | -0.329717 |
| 17               | 6                | 0              | -1.330263               | 0.541813  | -1.209012 |
| 18               | 1                | 0              | -0.088797               | 2.223200  | -1.694820 |
| 19               | 1                | 0              | -2.008563               | 0.719584  | -2.042081 |
| 20               | 1                | 0              | -0.910083               | -1.607939 | 1.389306  |
| 21               | 8                | 0              | 1.600237                | 2.007377  | 0.299157  |
| 22               | 6                | 0              | 0.640631                | 1.191177  | 0.070731  |
| 23               | 6                | 0              | -0.731330               | -0.789048 | 0.694580  |
| 24               | 8                | 0              | 3.152018                | -0.433231 | -3.372800 |
| 25               | 1                | 0              | 3.214970                | -1.153889 | -2.707169 |
| 26               | 1                | 0              | 3.219503                | 0.386862  | -2.841295 |
| 27               | 8                | 0              | 3.463709                | 1.813845  | -1.698821 |
| 28               | 1                | 0              | 3.633425                | 2.681278  | -2.099149 |
| 29               | 1                | 0              | 2.750378                | 1.960824  | -1.030882 |
| 30               | 8                | 0              | 5.317265                | 1.096211  | 0.308403  |

|    |   |   |           |           |           |
|----|---|---|-----------|-----------|-----------|
| 31 | 1 | 0 | 4.781645  | 1.317964  | -0.483128 |
| 32 | 1 | 0 | 4.706166  | 1.275043  | 1.061741  |
| 33 | 6 | 0 | -2.889066 | -1.331670 | -0.474242 |
| 34 | 1 | 0 | -3.177934 | -1.392062 | -1.531271 |
| 35 | 1 | 0 | -2.760313 | -2.352221 | -0.100947 |
| 36 | 6 | 0 | -4.056300 | -0.684342 | 0.311192  |
| 37 | 1 | 0 | -3.826593 | -0.710528 | 1.379594  |
| 38 | 7 | 0 | -4.256698 | 0.699178  | -0.076942 |
| 39 | 1 | 0 | -4.846611 | 0.857662  | -0.887357 |
| 40 | 6 | 0 | -5.330479 | -1.505977 | 0.050577  |
| 41 | 8 | 0 | -6.189299 | -1.027896 | -0.737157 |
| 42 | 8 | 0 | -5.387962 | -2.630563 | 0.617050  |
| 43 | 6 | 0 | -3.690699 | 1.752312  | 0.533293  |
| 44 | 8 | 0 | -2.989457 | 1.643711  | 1.556740  |
| 45 | 6 | 0 | -3.936384 | 3.099806  | -0.093338 |
| 46 | 1 | 0 | -4.277388 | 3.795262  | 0.677760  |
| 47 | 1 | 0 | -2.983084 | 3.470627  | -0.485015 |
| 48 | 1 | 0 | -4.665382 | 3.063165  | -0.905326 |

---

## Standard orientation of TS-NacTyr-p-C5

Cartesian coordinates of the transition states optimized at the M06-2X(D3)/6-31+G(d) level:

Standard orientation of transition state of TS-NacTyr-p-C5

State=1-A

Charge = -2 Multiplicity = 1

Lowest Harmonic Vibrational Frequency (LHVF) = -339.72 cm<sup>-1</sup>

Standard orientation:

| Center<br>Number | Atomic<br>Number | Atomic<br>Type | Coordinates (Angstroms) |           |           |
|------------------|------------------|----------------|-------------------------|-----------|-----------|
|                  |                  |                | X                       | Y         | Z         |
| 1                | 1                | 0              | 1.359435                | -1.841179 | -1.468583 |
| 2                | 8                | 0              | 1.714079                | 2.381306  | -0.380096 |
| 3                | 1                | 0              | 1.070020                | 2.845147  | -0.943588 |
| 4                | 17               | 0              | 1.137207                | 0.522090  | -0.490249 |
| 5                | 8                | 0              | 4.119181                | -1.981077 | -0.932916 |
| 6                | 1                | 0              | 3.754144                | -1.472301 | -1.690455 |
| 7                | 1                | 0              | 3.374748                | -2.074003 | -0.287167 |
| 8                | 8                | 0              | 4.118288                | 1.822823  | -1.540861 |
| 9                | 1                | 0              | 3.259059                | 2.128061  | -1.161648 |
| 10               | 1                | 0              | 4.534811                | 1.310333  | -0.809241 |
| 11               | 8                | 0              | 3.294182                | -0.326142 | -3.048915 |
| 12               | 1                | 0              | 3.556295                | 0.488920  | -2.552148 |
| 13               | 1                | 0              | 2.323852                | -0.333412 | -3.030177 |
| 14               | 6                | 0              | 0.621477                | -1.642551 | -0.694375 |
| 15               | 6                | 0              | -0.080839               | -2.034930 | 1.621998  |
| 16               | 6                | 0              | -1.759935               | -1.646322 | -0.129965 |
| 17               | 6                | 0              | -1.385117               | -1.884277 | 1.230339  |
| 18               | 1                | 0              | -2.174034               | -1.950224 | 1.978789  |
| 19               | 1                | 0              | -1.004679               | -1.388263 | -2.108545 |
| 20               | 8                | 0              | 2.203257                | -2.186293 | 1.000234  |
| 21               | 6                | 0              | 0.983497                | -1.983787 | 0.660281  |
| 22               | 6                | 0              | -0.760374               | -1.563693 | -1.062485 |
| 23               | 8                | 0              | 1.421212                | 2.241174  | 2.385913  |
| 24               | 1                | 0              | 1.425453                | 2.427481  | 1.421968  |
| 25               | 1                | 0              | 1.959626                | 1.426262  | 2.464542  |
| 26               | 8                | 0              | 3.118925                | -0.018549 | 2.416339  |
| 27               | 1                | 0              | 3.451704                | -0.309440 | 3.280221  |
| 28               | 1                | 0              | 2.756144                | -0.829637 | 1.984474  |
| 29               | 8                | 0              | 5.144469                | 0.185083  | 0.460985  |
| 30               | 1                | 0              | 4.497194                | 0.230076  | 1.197391  |



|    |   |   |           |           |           |
|----|---|---|-----------|-----------|-----------|
| 31 | 1 | 0 | 4.885593  | -0.629922 | -0.030644 |
| 32 | 6 | 0 | -3.209242 | -1.471157 | -0.496389 |
| 33 | 1 | 0 | -3.310331 | -1.468554 | -1.588681 |
| 34 | 1 | 0 | -3.807142 | -2.303578 | -0.108287 |
| 35 | 6 | 0 | -3.822047 | -0.163854 | 0.056954  |
| 36 | 1 | 0 | -3.836308 | -0.204991 | 1.149080  |
| 37 | 7 | 0 | -3.059961 | 1.005914  | -0.335741 |
| 38 | 1 | 0 | -3.291552 | 1.419379  | -1.233441 |
| 39 | 6 | 0 | -5.271068 | -0.063347 | -0.453547 |
| 40 | 8 | 0 | -5.512112 | 0.743863  | -1.390474 |
| 41 | 8 | 0 | -6.102401 | -0.844465 | 0.083014  |
| 42 | 6 | 0 | -2.206506 | 1.657253  | 0.473086  |
| 43 | 8 | 0 | -1.944469 | 1.269930  | 1.625862  |
| 44 | 6 | 0 | -1.615024 | 2.928708  | -0.080748 |
| 45 | 1 | 0 | -2.344741 | 3.737489  | 0.037392  |
| 46 | 1 | 0 | -0.717843 | 3.183416  | 0.485486  |
| 47 | 1 | 0 | -1.375954 | 2.836229  | -1.144240 |
| 48 | 1 | 0 | 0.175882  | -2.237692 | 2.658342  |

---

## Standard orientation of TS-3-Cl-NacTyr-p-C5

Cartesian coordinates of the transition states optimized at the M06-2X(D3)/6-31+G(d) level:

Standard orientation of transition state of TS-3-Cl-NacTyr-p-C5

State=1-A

Charge = -2 Multiplicity = 1

Lowest Harmonic Vibrational Frequency (LHVF) = -350.71 cm<sup>-1</sup>

Standard orientation:

| Center<br>Number | Atomic<br>Number | Atomic<br>Type | Coordinates (Angstroms) |           |           |
|------------------|------------------|----------------|-------------------------|-----------|-----------|
|                  |                  |                | X                       | Y         | Z         |
| 1                | 1                | 0              | -1.317352               | 0.219476  | -2.378134 |
| 2                | 8                | 0              | -1.677844               | -2.386266 | 1.141471  |
| 3                | 1                | 0              | -1.022212               | -3.092008 | 1.005718  |
| 4                | 17               | 0              | -1.088771               | -0.990720 | -0.142851 |
| 5                | 8                | 0              | -4.091525               | 0.606561  | -2.109974 |
| 6                | 1                | 0              | -3.703345               | -0.260276 | -2.364954 |
| 7                | 1                | 0              | -3.369347               | 1.096405  | -1.652048 |
| 8                | 8                | 0              | -4.034534               | -2.725650 | -0.161197 |
| 9                | 1                | 0              | -3.184084               | -2.690005 | 0.343935  |
| 10               | 1                | 0              | -4.486954               | -1.880509 | 0.066131  |
| 11               | 8                | 0              | -3.206462               | -1.993294 | -2.677492 |
| 12               | 1                | 0              | -3.467095               | -2.320560 | -1.779843 |
| 13               | 1                | 0              | -2.236298               | -1.967515 | -2.664714 |
| 14               | 6                | 0              | -0.587477               | 0.533819  | -1.635323 |
| 15               | 6                | 0              | 0.098999                | 2.282064  | -0.075989 |
| 16               | 6                | 0              | 1.788681                | 0.931842  | -1.215170 |
| 17               | 6                | 0              | 1.406734                | 1.953561  | -0.288595 |
| 18               | 1                | 0              | 2.183382                | 2.478513  | 0.264703  |
| 19               | 1                | 0              | 1.052318                | -0.516997 | -2.594878 |
| 20               | 8                | 0              | -2.187497               | 2.010144  | -0.673737 |
| 21               | 6                | 0              | -0.978894               | 1.652140  | -0.802307 |
| 22               | 6                | 0              | 0.800191                | 0.268942  | -1.886381 |
| 23               | 8                | 0              | -1.416384               | -0.504135 | 3.160690  |
| 24               | 1                | 0              | -1.411235               | -1.257332 | 2.528534  |
| 25               | 1                | 0              | -1.984164               | 0.161263  | 2.720036  |
| 26               | 8                | 0              | -3.210573               | 1.193344  | 1.769522  |
| 27               | 1                | 0              | -3.573753               | 1.945880  | 2.263511  |
| 28               | 1                | 0              | -2.820099               | 1.578202  | 0.951702  |
| 29               | 8                | 0              | -5.171368               | -0.224193 | 0.310668  |
| 30               | 1                | 0              | -4.549942               | 0.220013  | 0.926460  |

|    |    |   |           |           |           |
|----|----|---|-----------|-----------|-----------|
| 31 | 1  | 0 | -4.898560 | 0.105616  | -0.577177 |
| 32 | 6  | 0 | 3.244411  | 0.592377  | -1.386820 |
| 33 | 1  | 0 | 3.355926  | -0.093380 | -2.235107 |
| 34 | 1  | 0 | 3.827581  | 1.493972  | -1.604999 |
| 35 | 6  | 0 | 3.857915  | -0.069176 | -0.131231 |
| 36 | 1  | 0 | 3.870584  | 0.652377  | 0.689512  |
| 37 | 7  | 0 | 3.098788  | -1.226101 | 0.302159  |
| 38 | 1  | 0 | 3.339111  | -2.113663 | -0.128398 |
| 39 | 6  | 0 | 5.307226  | -0.467144 | -0.463613 |
| 40 | 8  | 0 | 5.542928  | -1.681744 | -0.700170 |
| 41 | 8  | 0 | 6.143313  | 0.474635  | -0.518437 |
| 42 | 6  | 0 | 2.236201  | -1.216770 | 1.333852  |
| 43 | 8  | 0 | 1.966783  | -0.184936 | 1.973757  |
| 44 | 6  | 0 | 1.644899  | -2.551225 | 1.712053  |
| 45 | 1  | 0 | 0.741594  | -2.387372 | 2.301455  |
| 46 | 1  | 0 | 1.415601  | -3.158066 | 0.831117  |
| 47 | 1  | 0 | 2.370387  | -3.096970 | 2.325541  |
| 48 | 17 | 0 | -0.322497 | 3.539386  | 1.058327  |

---

## Standard orientation of TS-5-Cl-NacTyr-p-C3

Cartesian coordinates of the transition states optimized at the M06-2X(D3)/6-31+G(d) level:

Standard orientation of transition state of TS-5-Cl-NacTyr-p-C3

State=1-A

Charge = -2 Multiplicity = 1

Lowest Harmonic Vibrational Frequency (LHVF) = -355.37 cm<sup>-1</sup>

Standard orientation:

| Center<br>Number | Atomic<br>Number | Atomic<br>Type | Coordinates (Angstroms) |           |           |
|------------------|------------------|----------------|-------------------------|-----------|-----------|
|                  |                  |                | X                       | Y         | Z         |
| 1                | 1                | 0              | 0.979061                | -1.047496 | 1.679885  |
| 2                | 8                | 0              | 3.325663                | -1.701875 | -2.025234 |
| 3                | 1                | 0              | 2.954750                | -2.496996 | -2.444506 |
| 4                | 17               | 0              | 1.918113                | -1.202496 | -0.701914 |
| 5                | 8                | 0              | 3.360239                | 0.041819  | 2.724294  |
| 6                | 1                | 0              | 3.278333                | -0.913913 | 2.507007  |
| 7                | 1                | 0              | 2.674254                | 0.496962  | 2.183839  |
| 8                | 8                | 0              | 5.142059                | -2.020879 | -0.023557 |
| 9                | 1                | 0              | 4.534897                | -1.976029 | -0.802963 |
| 10               | 1                | 0              | 5.277554                | -1.080637 | 0.237656  |
| 11               | 8                | 0              | 3.418615                | -2.670205 | 2.022533  |
| 12               | 1                | 0              | 4.021679                | -2.501491 | 1.255779  |
| 13               | 1                | 0              | 2.555436                | -2.870153 | 1.626271  |
| 14               | 6                | 0              | 0.455928                | -0.638534 | 0.818143  |
| 15               | 6                | 0              | -0.285804               | 1.366790  | -0.358789 |
| 16               | 6                | 0              | -1.626134               | -0.677138 | -0.460615 |
| 17               | 6                | 0              | -1.354486               | 0.673644  | -0.851224 |
| 18               | 1                | 0              | -2.030542               | 1.165705  | -1.547591 |
| 19               | 1                | 0              | -0.910244               | -2.322824 | 0.693022  |
| 20               | 8                | 0              | 1.572753                | 1.441529  | 1.125911  |
| 21               | 6                | 0              | 0.632324                | 0.783701  | 0.592323  |
| 22               | 6                | 0              | -0.738325               | -1.297436 | 0.372586  |
| 23               | 8                | 0              | 3.044309                | 0.812630  | -3.154067 |
| 24               | 1                | 0              | 3.134462                | -0.124077 | -2.866843 |
| 25               | 1                | 0              | 3.176619                | 1.325413  | -2.329804 |
| 26               | 8                | 0              | 3.547948                | 2.105985  | -0.695361 |
| 27               | 1                | 0              | 3.699550                | 3.063770  | -0.736290 |
| 28               | 1                | 0              | 2.799208                | 1.981556  | -0.067944 |
| 29               | 8                | 0              | 5.351386                | 0.612024  | 0.870387  |
| 30               | 1                | 0              | 4.833450                | 1.158098  | 0.241157  |

|    |    |   |           |           |           |
|----|----|---|-----------|-----------|-----------|
| 31 | 1  | 0 | 4.721981  | 0.450451  | 1.611285  |
| 32 | 6  | 0 | -2.924412 | -1.317867 | -0.872278 |
| 33 | 1  | 0 | -3.214459 | -0.976113 | -1.873713 |
| 34 | 1  | 0 | -2.819022 | -2.406426 | -0.902012 |
| 35 | 6  | 0 | -4.071050 | -0.974303 | 0.112075  |
| 36 | 1  | 0 | -3.851076 | -1.416706 | 1.086586  |
| 37 | 7  | 0 | -4.211447 | 0.459716  | 0.284168  |
| 38 | 1  | 0 | -4.765736 | 0.944190  | -0.414440 |
| 39 | 6  | 0 | -5.374081 | -1.582239 | -0.434839 |
| 40 | 8  | 0 | -6.183764 | -0.811717 | -1.015657 |
| 41 | 8  | 0 | -5.502966 | -2.828661 | -0.298465 |
| 42 | 6  | 0 | -3.595574 | 1.175381  | 1.239575  |
| 43 | 8  | 0 | -2.914307 | 0.652716  | 2.141189  |
| 44 | 6  | 0 | -3.755440 | 2.671138  | 1.165397  |
| 45 | 1  | 0 | -4.095526 | 3.042270  | 2.135736  |
| 46 | 1  | 0 | -2.770602 | 3.107264  | 0.964884  |
| 47 | 1  | 0 | -4.451164 | 2.987174  | 0.385610  |
| 48 | 17 | 0 | -0.019636 | 3.027569  | -0.822892 |

---
